# Supplementary material for: The impact of neurological disorders on the risk for falls in the community dwelling elderly: a case-controlled study
Source: PubMed Central journal article supplement — BMJ Open. 2013 Nov 25;3(11):e003367. doi: 10.1136/bmjopen-2013-003367 (PMC3845038; doi:10.1136/bmjopen-2013-003367), 2013-11-25
Supplement: bmjopen-2013-003367.draft_revisions.pdf [file bmjopen-2013-003367.draft_revisions.pdf]

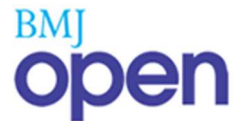

**The impact of various neurological disorders on the risk for falls in the community dwelling elderly: a case controlled study**

|                                 |                                                                                                                                                                                                                                                                                                                                                                                                                                                                                                                                           |
|---------------------------------|-------------------------------------------------------------------------------------------------------------------------------------------------------------------------------------------------------------------------------------------------------------------------------------------------------------------------------------------------------------------------------------------------------------------------------------------------------------------------------------------------------------------------------------------|
| Journal:                        | <i>BMJ Open</i>                                                                                                                                                                                                                                                                                                                                                                                                                                                                                                                           |
| Manuscript ID:                  | bmjopen-2013-003367                                                                                                                                                                                                                                                                                                                                                                                                                                                                                                                       |
| Article Type:                   | Research                                                                                                                                                                                                                                                                                                                                                                                                                                                                                                                                  |
| Date Submitted by the Author:   | 07-Jun-2013                                                                                                                                                                                                                                                                                                                                                                                                                                                                                                                               |
| Complete List of Authors:       | Homann, Barbara; Medical University Graz, Neurology<br>Plaschg, Annemarie; Medical University Graz, Neurology<br>Grundner, Marion; Medical University Graz, Neurology<br>Haubenhofner, Alice; Medical University Graz, Neurology<br>Griedl, Theresa; Medical University Graz, Neurology<br>Ivanic, Gerd; Private Paracelsus Medical University Salzburg, Orthopedic Surgery<br>Hofer, Edith; Medical University Graz, Neurology<br>Fazekas, Franz; Medical University Graz, Neurology<br>Homann, Carl; Medical University Graz, Neurology |
| <b>Primary Subject Heading</b>: | Neurology                                                                                                                                                                                                                                                                                                                                                                                                                                                                                                                                 |
| Secondary Subject Heading:      | Geriatric medicine, Public health, Neurology                                                                                                                                                                                                                                                                                                                                                                                                                                                                                              |
| Keywords:                       | Falls, fall risk, elderly, community dwelling, neurological disorders                                                                                                                                                                                                                                                                                                                                                                                                                                                                     |
|                                 |                                                                                                                                                                                                                                                                                                                                                                                                                                                                                                                                           |

SCHOLARONE™  
Manuscripts

only

1  
2  
3  
4 **The impact of various neurological disorders on the risk for falls in the**  
5 **community dwelling elderly: a case controlled study**  
6  
7  
8  
9

10 **Falls in the community dwelling elderly: the impact of neurological disorders**  
11

12  
13  
14 Homann, Barbara<sup>1</sup>; Plaschg, Annemarie<sup>1</sup>; Grundner, Marion<sup>1</sup>; Griedl, Theresa<sup>1</sup>; Ivanic, Gerd<sup>2</sup>;  
15 Hofer, Edith<sup>1</sup>; Fazekas, Franz<sup>1</sup>; Homann, Carl Nikolaus<sup>1</sup>  
16  
17

18  
19 <sup>1</sup>) Medical University Graz, Dept of Neurology, <sup>2</sup>) Paracelsus Medical University Salzburg, Dep. of  
20 Orthopaedic Surgery  
21  
22  
23  
24  
25  
26  
27  
28  
29  
30  
31  
32  
33  
34  
35  
36  
37  
38  
39  
40  
41  
42  
43  
44  
45  
46  
47  
48  
49  
50  
51  
52  
53  
54  
55  
56  
57  
58  
59  
60

## ABSTRACT

**Objectives:** Owing to a lack of data, our aim was to evaluate and compare the impact of various common neurological diseases on the risk for falls in independent community dwelling senior citizens.

**Design:** Prospective case controlled study

**Setting:** General Hospital

**Participants:** Out of 298 consecutive patients and 214 controls enrolled, 228 patients (aged 74.5±7.8; 61% women) and 193 controls (aged 71.4±6.8; 63% women) were included. Exclusion criteria for patients were severe disability, disabling general condition, or severe cognitive impairment, for controls any history of neurological disorders or disabling medical conditions, and for both age below 60 years. A matching process led to 171 age- and gender-matched pairs of neurological patients and healthy controls.

**Main outcome measures:** One-year incidence of falls, motor and non- motor function tests to detect additional risk factors.

**Results:** 46% of patients and 16% of controls fell at least once a year. Patients with stroke (89%), Parkinson's disease (77%), dementia (60%) or epilepsy (57%) had particularly high fall frequencies, but even patients with the least fall-associated neurological diseases like tinnitus (30%) and headache (28%) had a higher incidence of falls than controls. Neuropathies, peripheral nerve lesions and Parkinson's disease were predisposing to recurrent falls. A higher number of neurological comorbidities ( $p<0.001$ ), lower Barthel Index values ( $p<0.001$ ), lower Activities-Specific Balance Confidence scores ( $p<0.001$ ), and higher Center of Epidemiological Studies Depression scores ( $p<0.001$ ) as well as higher age ( $p<0.001$ ) and female gender ( $p=0.003$ ) proved to further increase the risk of falls.

**Conclusions:** Physicians should be aware that all elderly neurological patients seen in outpatient settings are potentially at high risk for falls; they should query them routinely about previous falls and fall risks and advise them on preventive strategies.

### Article summary

#### Article focus

- Previous studies have shown that falls in the elderly are common and limited data on single neurological impairments suggest that these conditions further increase the risk for falls.

- However, little is known on the influence of a broad range of neurological diseases and how they differ among each other. No data is available on independent community dwelling senior citizens.
- The aim of this study is to provide comparative data on the risk of falling in ambulatory elderly subjects afflicted with various common neurological diseases and to evaluate the role of additional risk factors.

### ***Key messages***

- The results of our study suggest that all elderly neurological patients even when still ambulatory carry a heightened risk for falls.
- The impact differs according to disease but those with impairments of the sensorimotor system are particularly endangered. However our findings revealed that even neurological disorders not directly connected with gait and balance carry an astonishingly high risk for falls.

### ***Strengths and limitations of this study***

- Strengths of this study include the prospective study design, the number of standardised outcome measures, the standardised assessment of neurological patients and the thorough examination and inclusion of healthy controls.
- The following limitations should be considered: the information on falls was self-reported and underreporting of cases is possible. Small sample sizes in some of the subgroups of neurological diseases. Participants were mostly of Caucasian origin, which may limit the generalisability of the results to other populations.

## INTRODUCTION

Due to budget cuts and austerity measures the costs of accidents and falls have come into the spotlight of health policy makers. The World Health Organisation too has recently made fall prevention in the elderly one of its top priorities. The WHO Global Report on Falls Prevention in Older Age states that due to the high percentage of elderly people worldwide the economic and societal burden of falls will increase by epidemic proportions in all parts of the world over the next few decades, unless concerted action is taken in a systematic and proactive fashion by policy makers, researchers and practitioners<sup>1</sup>.

It is known that falls in the elderly are common and have a great impact on life and wellbeing. Studies have shown that around 30% of subjects of 65 years plus had a fall during the last 12 months<sup>2</sup> with 10% sustaining severe injuries<sup>3</sup>. Injuries are the fifth most frequent cause of death in the elderly and up to 70% of these injuries were caused by falls<sup>4</sup>. Elderly persons surviving a fall experience significant morbidity: as many as one-third require assistance in their activities of daily living for as long as 6 months<sup>5</sup>. Lasting disabilities are also common as many do not reach pre-fall physical functional states, resulting in increased dependency and (in up to 50%) a transfer to a care facility<sup>4</sup>. Associated as they are with considerable mortality as well as psychological and physical morbidity, these falls lead to increased dependence upon social support and health care services, with high economic impact on the social and health care system<sup>6</sup>. But there is substantial evidence that falls can be prevented when subjects at risk are identified and enrolled in targeted prevention programs<sup>2</sup>.

Several risk factors like sociodemographic variables, physical activity, alcohol consumption, acute and chronic health problems, dizziness, mobility, and medications have been documented repeatedly<sup>7</sup>. Neurological impairments in the elderly are also thought to increase the risk for falls, though evidence for this is mostly derived indirectly from investigations into the causes of falls in the elderly<sup>8</sup>. These studies show that patients admitted to hospitals due to falls frequently also suffer from neurological disorders. Data derived from a multidisciplinary fall consultation survey suggest that in two out of three patients, potentially fall inducing neurological disorders were present, most of them (85%) previously undiagnosed<sup>9</sup>.

There is, however, substantially less known about the risk for falls in patients afflicted with various common neurological diseases. Several studies were conducted on the risk of falls in patients with a single neurological disease like stroke<sup>10</sup>, Parkinson's disease<sup>11</sup> or dementia<sup>12</sup>, but to our knowledge only one comparative study investigated falls in patients with different neurological diseases. This study by Stolze, however, was conducted on patients with neurological diseases severe enough to require hospital admission<sup>13</sup>. To date little is known about the risk of falling in

1 independent, community dwelling senior citizens afflicted with neurological diseases treatable in  
2 outpatient facilities. Studies targeting this issue so far either did not use a control group or, if they  
3 did, the absence of neurological signs and symptoms in this cohort was not guaranteed.  
4

5 Because falls in community dwelling elderly patients are assumed to be both prevalent and  
6 preventable, neurologists in outpatient settings need a sound base to identify patients with the  
7 highest risk, to reduce not only the number of falls and the suffering they entail, but also overall  
8 health care costs. Our study thus aimed to investigate the risk of falls in elderly patients with  
9 various neurological diseases that are commonly encountered in outpatient facilities. We  
10 hypothesized that even in community dwelling elderly patients, the impact one or more  
11 neurological diseases on top of an already increased propensity for falls is substantial; that patients  
12 with certain diseases like stroke or Parkinson's disease are particularly at risk; and that affliction  
13 with more than one of these high risk diseases increases the risk even further.  
14  
15  
16  
17  
18  
19  
20  
21  
22  
23  
24  
25  
26

## 27 **PARTICIPANTS AND METHODS**

### 28 **Epidemiological and environmental bases**

29 Data were collected at the Department of Neurology of the University Hospital in Graz, Austria.  
30 The Department of Neurology provides health care for about 500,000 people in Styria and southern  
31 Burgenland, though mostly to inhabitants of Graz and the surrounding area. The department focuses  
32 its basic and clinical research on cerebro-vascular disorders, dementia, epilepsy, movement  
33 disorders and multiple sclerosis. At this teaching hospital, out of a total of 1565 beds, there are 92  
34 neurological beds, including 8 in intensive care and 6 in the stroke unit. Out of approximately  
35 22,600 neurological outpatient contacts recorded each year 4,600 are from the general outpatient  
36 department, the rest in equal proportions from specialized outpatient clinics and the neurological  
37 emergency room. Two out of five neurologists are in rotation on duty at the Neurology Outpatient  
38 Clinic and they are attending to the patients on a random basis. As visits to the outpatient  
39 department do not require specialist referrals, the disease spectrum largely resembles that seen by  
40 community based neurologists.  
41  
42  
43  
44  
45  
46  
47  
48  
49  
50  
51  
52  
53  
54

### 55 **Selection of participants and baseline examination**

56 Physically independent community dwelling patients treated in our general neurological outpatient  
57 clinic aged 60 years and over were included in the study. Patients were all seen consecutively by  
58  
59  
60

1  
2  
3  
4  
5  
6  
7  
8  
9  
10  
11  
12  
one and the same consultant (CNH) in the period from July 2007 to May 2008, what also explains the study size. Severely disabled patients who were no longer able to walk unaided, were in poor general condition, or cognitively impaired to an extent that an interview would no longer yield reliable results, were excluded from the study. All neurological patients included underwent a full neurological workup with an extensive history to detect signs of past and present neurological disorders. For the sake of uniformity, both the workup and history were structured and followed the study protocol.

13  
14  
15  
16  
17  
18  
19  
20  
21  
22  
23  
24  
As healthy controls, individuals from the general public out of the same catchment area as cases were enrolled. They were recruited among friends and acquaintances of the author and his co-workers who were aged 60+ and without any history of neurological disorders or other disabling medical conditions. Examination and history were as per study protocol, whereby special emphasis was placed on identifying symptoms and signs of Parkinson's disease, peripheral neuropathy, stroke or epilepsy, as well as minor sensory-motor deficits and gait or balance impairments. Controls with even subtle pathologies were excluded.

25  
26  
27  
28  
29  
A telephone follow-up was scheduled 12 months after the baseline outpatient visit; it was carried out by one of two examiners (AP, MG) following a predefined format and only subjects who had given informed consent beforehand were interviewed.

30  
31  
32  
33  
34  
35  
36  
37  
38  
39  
The first section of the interview questionnaire covered demographic data like age and place of residence. The residence category had 5 subsections on size and traffic infrastructure, with group 1 being the state capital and group 5 a small town in the periphery. Next were specific questions on fall frequency, physical disability, depression and confidence in one's own sense of balance. The final section dealt with risk situations (like when using public transport) and general mobility issues, whereby the latter are not included in this publication.

40  
41  
42  
43  
44  
The survey, including all details concerning the selection process, was approved by the Ethics Committee of the Medical University Graz.

#### 45 46 **Frequency of falls**

47  
48  
49  
50  
51  
52  
53  
In the main section of the questionnaire patients and healthy controls were asked whether they had had a fall during the past 12 months and, if yes, how many times they had fallen. The yearly fall incidence was graded according to the fall frequency index into 5 categories. Category one means 1-2 falls, category two 3-5, three 6-10, four 11-20, and five more than 20 falls.

#### 54 55 **Analysis of Disability**

56  
57  
58  
59  
60  
The Barthel Index <sup>14</sup>, a disability scale with scores from 0 (completely dependent) to 100 (completely independent) was used to evaluate the functional status of all neurological patients.

1  
2  
3  
4  
5  
6  
7  
8  
9  
10  
11  
12  
13  
14  
15  
16  
17  
18  
19  
20  
21  
22  
23  
24  
25  
26  
27  
28  
29  
30  
31  
32  
33  
34  
35  
36  
37  
38  
39  
40  
41  
42  
43  
44  
45  
46  
47  
48  
49  
50  
51  
52  
53  
54  
55  
56  
57  
58  
59  
60

Parkinson patients were also rated according to the modified Hoehn and Yahr Scale, the Schwab and England Scale and the Unified Parkinson's Disease Rating Scale (UPDRS) <sup>15</sup>.

### **Analysis of Depression**

To determine the grade of depression, the Allgemeine Depressionsskala Kurzform (ADS-K) <sup>16</sup>, the German short form of the Center of Epidemiological Studies Depression Scale (CES-D) <sup>17</sup> was used. It is known to be particularly well suited for the use in the elderly and in patients with certain neurological disabilities <sup>18</sup>.

### **Analysis of the Confidence in one's own Sense of Balance**

We also rated the patients' confidence in their own sense of balance with the Activities-Specific Balance Confidence Scale (ABC -6 scale) <sup>19</sup>. Participants judged their confidence not to fall during specific activities on a scale ranging from 0% (no confidence at all) to 100% (completely confident). The total score was then computed as an average of the subscores.

### **Statistical analysis**

The one-year incidence of falls was calculated for both healthy elderly individuals and the whole sample of neurological patients. Further calculations were done for subsamples of 13 neurological disorders with the highest prevalence. The means and standard deviations were calculated for numerical values like the rating scale scores. For the identification of fall related risk factors, correlations (Kendall's  $\tau$ -B), and for the individual neurological disorders, risk odds ratios were computed ( $\alpha$ -level of significance  $p < 0.05$ ). Differences between neurological patients and healthy controls were tested with the Mann-Whitney U test or the chi-square test ( $\alpha$ -levels of significance  $p < 0.05$ ). To insure comparability of cohorts we formed age- and gender-matched pairs of patients and control subjects (allowing an age deviation of  $\pm 3$  years) according to a predefined algorithm. Only complete sets of data were included in the calculations and no approximates to replace missing values were computed. Calculations were performed with SPSS <sup>®</sup> statistical software PASW statistics 18. Potential bias and how it was addressed will be dealt with in the section on limitations.

## **RESULTS**

During a period of 10 months we recruited 298 mobile neurological outpatients and 214 healthy



controls aged 60 years and over. In the group of healthy controls 21 patients initially recruited could not be included in the study due to neurological symptoms and signs, or a history of a neurological disorder. In the group of neurological patients another 70 patients had to be excluded from the study because at the time of the interview they (15%) or their caregiver (9%) requested exclusion, the telephone number on record had been disconnected (34%), all attempts to contact them failed (16%), they had become so disabled that they could no longer participate in the survey (15%), they had died (5%), or for other reasons (8%).

The statistical analysis thus covered 228 neurological outpatients (aged  $74.5 \pm 7.8$ ; 61% women) and 193 healthy controls. The matching process led to 171 pairs of neurological patients and healthy controls, 101 women and 70 men in each group, aged 72.0 and 72.2 years, respectively. The details of these subjects are summarized in Table 1.

### **Incidence of falls in neurological patients and healthy controls**

One hundred and six (46.5%) neurological patients but only 31 (16.1%) healthy controls had fallen at least once ( $p < 0.001$ ) during this one-year period. Out of 126 neurological patients experiencing falls, 76 (71,7%) fell once or twice, 22 (20,8%) three to five times, three (2,8%) six to nine times, three (2,8%) 11-20 times and two (1,9%) more than 20 times. In the group of healthy controls, out of 76 individuals with a history of falls, 24 (77,4%) fell once or twice, and seven (22,6%) three to five times, but none more often than that. In the matched cohorts as well falls were more frequent in neurological patients (42,1%) than in healthy controls (16,9%) ( $\text{Chi}^2=26,3$ ;  $p < 0.001$ ). (Table 1)

The mean age of individuals with a history of falls as compared to those without was higher both in the neurologically affected (fallers:  $76,7 \pm 7,6$  vs. nonfallers:  $72,6 \pm 7,5$ ;  $p < 0.001$ ) and in healthy controls (fallers:  $73,3 \pm 6,5$  vs. nonfallers:  $71,0 \pm 6,9$ ;  $p = 0.040$ ). In the group of neurological patients, 75 of 106 fallers (71%) were female, but only 31 (29%) were male ( $\text{Chi}^2=8,675$ ;  $p = 0.003$ ). Similarly, in the group of healthy controls a higher percentage of fallers was female, with 23 out of 31 (74%), but this did not reach significance ( $\text{Chi}^2=1,915$ ;  $p = 0,166$ ).

The occurrence of falls in neurological patients was independent of where they lived. For healthy controls, however, their place of residence had an influence, in that subjects living in more rural environments were more prone to falls ( $p < 0.001$ ).

Repeated falls occurred particularly in patients with peripheral neuropathy (43%), peripheral nerve lesion (43%), dementia (33%), Parkinson's disease (30%), stroke (30%) and vertebral pain (30%).

1 The average fall frequency index in this group of patients with frequent falls ranged from 1,63  
2 (peripheral neuropathy) to 1,33 (dementia) (Fig. 1.).  
3  
4  
5  
6  
7  
8

### 9 **Risk factors for falls in neurological patients**

10 The type of neurological disease the patient was afflicted with influenced the frequency of falls in  
11 that patients post stroke (89%), with Parkinson's disease (77%), dementia (60%) and epilepsy (57%)  
12 had the highest frequency of falls. The lowest likelihood of falls was found in patients suffering  
13 from tinnitus (30%) and headache (28%), but was still higher than that of the average healthy  
14 control (16,1%). (Fig. 2)  
15  
16  
17  
18  
19

20 The respective odds ratios are shown in table 2 and range from 40,1 (stroke) to 2,1 (headache) and  
21 the relative risk of falling ranges between 5,5 for stroke patients and 1,8 for patients with headache.  
22  
23

24 No specific combination of two or three neurological diseases characterized by substantial gait or  
25 balance impairment but any accumulation of several neurological diseases regardless of their  
26 influence on gait or balance was able to cause a significant raise in falls ( $\Gamma$ -B=0,303;  $p<0.001$ ).  
27  
28

29 Other risk factors for falls in neurological patients were female gender ( $\Gamma$ -B=0,195;  $p=0.003$ ),  
30 higher age ( $\Gamma$ -B=0,217;  $p<0.001$ ), higher disability or disease severity as measured by the Barthel  
31 Index ( $\Gamma$ -B=-0,232;  $p<0.001$ ). Higher disability scores in Parkinson patients expressed by higher  
32 UPDRS II (activities of daily living) scores resulted in a trend toward more frequent falls ( $\Gamma$ -B=-  
33 0,238;  $p=0.062$ ). Severity of depression as reflected by a higher ADS score ( $\Gamma$ -B=0,329;  $p<0.001$ )  
34 and low balance confidence reflected by higher ABC scores ( $\Gamma$ -B=-0,384;  $p<0.001$ ) were also  
35 predictive (Fig. 3).  
36  
37  
38  
39  
40  
41  
42  
43  
44  
45  
46  
47

## 48 **DISCUSSION**

### 49 **Incidence of falling**

50 Our study suggests that even in patients mildly to moderately affected by neurological impairments  
51 the incidence of falls was three times higher than in subjects without any neurological symptoms or  
52 signs. To our knowledge this is the first survey conducted on elderly neurological outpatients and  
53 controls proven to be without neurological impairments, but the extent of this increased relative risk  
54  
55  
56  
57  
58  
59  
60

1 in neurological patients was unexpected, and resulted from low incidence figures in the group of  
2 controls and particularly high figures in the patient group.  
3

4  
5 In our group of healthy controls the 12-month incidence (16,1 %) was considerably lower than in  
6 previous population based data serving as a reference for previous studies <sup>20</sup>. Literature suggests  
7 that a third to one half of the community dwelling population of 60+ experience falls each year. For  
8 a group of 1762 subjects 60+ years of age, Lord reported a yearly incidence rate of falls of 28% <sup>21</sup>.  
9  
10 In individuals of 65 years and older Prudham found in his survey conducted on 2793 individuals  
11 that 28% experienced one or more falls in the last year <sup>22</sup>. In O'Loughlin's group of 409 it was 29%  
12  
13 <sup>7</sup>, in Campbell's group of 533, 33% <sup>23</sup>, and in Blake's group of 1042, 35%. <sup>24</sup> Luukinen's group of  
14  
15 833 individuals aged 70+ showed a 30% annual rate of falls <sup>3</sup> and Tinetti's group of 336 aged 75+  
16  
17 showed a rate of 32% <sup>25</sup>. For the very old, Campbell found in a community-based prospective study  
18  
19 based on 761 subjects that half of those age 80 years and over have a fall every year <sup>26</sup>. This inci-  
20  
21 dence rate, twice or three times that of our figures, did not surprise us. Population-based data of el-  
22  
23 derly individuals inevitably include a considerable number of patients suffering from neurological  
24  
25 diseases or other forms of gait or balance problems. Many of these neurological disorders like  
26  
27 stroke, Alzheimer's disease or Parkinson's disease are typical diseases of the elderly and others like  
28  
29 epilepsy or traumatic brain injury also have a second peak in higher age <sup>27</sup>. This shows how im-  
30  
31 portant it is, when studying groups of elderly patients, to have a truly healthy control group, as in  
32  
33 our survey.

34  
35 Our study also shows that half of all ambulatory neurological patients had had at least one fall with-  
36  
37 in the last 12 month. As to our knowledge this is the first survey of neurological outpatients, the  
38  
39 lack of comparative data gave us no choice but to relate our findings to Stolze's data on neurologi-  
40  
41 cal inpatients showing, much to our surprise, a falling incidence as low as 34% <sup>13</sup>. One would have  
42  
43 assumed that Stolze's patients, who required inpatient treatment for their neurological conditions,  
44  
45 would be more severely disabled and thus more prone to falls than outpatients. It also appears con-  
46  
47 tradictory our findings that indicators of disease severity like the Barthel index and the UPDRS cor-  
48  
49 related positively with the incidence of falls. Several studies further support this concept by stating  
50  
51 that the more severely affected patients are, the higher the falling risk <sup>28</sup>. However, we have reasons  
52  
53 to believe that the correlation is not linear throughout all grades of disability but rather resembles an  
54  
55 inverse U-shaped curve. We think that the initial propensity for falls increases with higher disability  
56  
57 only up to a certain point. Then, as patients become more cautious and use all kind of supports, it  
58  
59 plateaus and even decreases. When patients become so disabled that they are finally bedridden, the  
60  
61 risk approaches zero with the lack of opportunities to fall. Our values so would be located on the  
62  
63 inclining leg close to the peak and Stolze's further down on the declining leg. Since this concept is  
64  
65 not yet backed up by sound evidence, further studies directly comparing the risk of falling in neuro-

logical inpatients and outpatients of various grades of disability are needed to support this assumption.

Considering recurrent falls we found that in the group of neurological patients 13,2 % fell three or more times per year, compared to 3,6% in the group of healthy controls. This is in keeping with the results of studies investigating recurrent falls, where figures of 8% for three or more falls in randomly selected community dwelling elderly individuals are given<sup>29</sup> and 10% for community based seniors using home care services<sup>30</sup>. In Stolze's cohort of inpatients the value of 21% for recurrent falls was higher and can probably be explained by methodological differences. Stolze's category of recurrent falls already includes patients who had fallen twice, unlike our and other studies<sup>29,30</sup> that include patients only after more than three falls.

### **Risk factors contributing to falls**

We found out that the type of neurological disease afflicting a patient determines the potential risk factor for falls. Here, two diseases stood out: stroke patients were 6 times (89%) and Parkinson patients 5 times (71%) more likely to suffer falls than healthy controls (16%). This is in keeping with previous community based studies showing a high likelihood for falls in stroke patients with a range of 51-73%<sup>10,20,31</sup> and in Parkinson's patients with a range of 38 – 87%<sup>11,32-38</sup>. This was followed by a group of neurological diseases with an almost 4 times higher likelihood (55-60%) of falls, consisting of dementia, epilepsy, other movement disorders, other vascular diseases and peripheral neuropathy. These diseases are also known to carry a high risk for falls, with an annual fall rate of 60-80%<sup>12,39</sup> in Alzheimer patients and 55-65%<sup>40-42</sup> in patients with peripheral neuropathy. The only study conducted on falls in elderly patients suffering from epilepsy is one on care facility residents, providing a 5-year fall incidence of 83%<sup>43</sup>. In our sample peripheral neuropathy also proved to be a risk factor for recurrent falls, but most likely significance was not reached due to the small sample size (p=0.061). Confirmative data also obtained from small cohorts revealed that repetitive falls occurred in 10 out of 25 (40%) neuropathy patients<sup>42</sup> and another 13 out of 20 neuropathy patients (65%) had a propensity for recurrent falls for an average of 5,8 falls per year<sup>40</sup>. New and quite astonishing was the fact that even patients suffering from neurological diseases with no direct influence on gait or balance like headache (28%) had almost twice as many falls as the average healthy control (16,1%). Also new is that in contrast to all the above cited data derived from studies on patients with only one neurological disorder, our survey provides comparative values for several neurological diseases of elderly ambulatory neurological patients for the first time, allowing a direct comparison between these disorders and a ranking according to the risk of falling.

But our findings further suggest that not only the type of neurological conditions, but also the number of neurological diseases a patient was suffering from, no matter whether they had an influence

1 on gait or balance, correlated with the risk of falling. This came as a surprise as we assumed that  
2 only accumulations of neurological deficits relating to gait and balance would influence the risk for  
3 falls. Although there were no published studies on the influence of neurological diseases, it is  
4 known that persons with an impaired sense of balance have an disproportionately higher risk for  
5 falls when they acquire an additional new disease or condition, even if it is one that seems minor or  
6 not related to falling per se. Tinetti was able to demonstrate that the number of chronic diseases a  
7 patient was suffering from was highly predicative of a risk to fall, better even than a mobility score.  
8 She concluded that falling appears to result from an accumulated effect of multiple specific disabili-  
9 ties<sup>44</sup>. This would be in keeping with our other findings, that old age in combination with any neu-  
10 rological disease increases the risk of falling above that of healthy controls, even if it is a disease  
11 like headache. Also in accordance with this we found that a higher rate of depression, as reflected  
12 by a higher ADS-score, also increased the risk for falls. An alternative explanation for this could be  
13 that depressive thoughts are frequently combined with negative conceptions of one's own sense of  
14 balance, which was found to be a prominent risk factor for falls in our and previous other studies<sup>45</sup>.  
15 That higher age would be a predictive factor for falls in neurological patients replicates previous  
16 findings<sup>13</sup> and is easy to explain: old age is often associated with greater frailty and eventually  
17 frailty with less confidence in one's sense of balance and a higher incidence of falls<sup>45</sup>. That females  
18 are more prone to falls than males has often been stated before<sup>13</sup> and has previously been explained  
19 by a fear of falling and a loss of confidence – both independent risk factors for falls - being more  
20 prominent in women<sup>6</sup>.

## 37 38 39 40 41 42 43 44 45 46 47 48 49 50 51 52 53 54 55 56 57 58 59 60

We also faced several limitations in our study. First and most importantly, like most other surveys  
dealing with falls, we faced the problem that the number of falls is underreported. Elderly subjects  
often try to downplay problems regarding their mobility for fear of having their autonomy  
restricted. While this is in general typically found in the healthy elderly, it might be even more  
prominent in patients with disabilities. But even remembering these events might pose a problem in  
some of the patients with central degenerative diseases and this might have been a relevant factor in  
our study, even though we excluded patients with severe dementia. The risk for falls in neurological  
patients might therefore be greater than shown in any results.

Secondly, almost one quarter of neurological patients were lost for follow up, which could have  
lead to further underestimating the number of patients with falls. However, since these patients did  
not obviously differ in their baseline characteristics, we assume this problem to be minimal.

1  
2  
3  
4  
5  
6  
7  
8  
9  
10  
11  
12  
13  
14  
15  
16  
17  
18  
19  
20  
21  
22  
23  
24  
25  
26  
27  
28  
29  
30  
31  
32  
33  
34  
35  
36  
37  
38  
39  
40  
41  
42  
43  
44  
45  
46  
47  
48  
49  
50  
51  
52  
53  
54  
55  
56  
57  
58  
59  
60

Thirdly, elderly subjects without even the slightest neurological symptoms are hard to find and therefore the use of a cohort of this rare group of supranormal individuals as a reference group might not be representative. The patient cohort we examined was a group of neurological patients who were mobile and affected by only mild to moderate neurological symptoms. This group of elderly patients, of the kind typically seen in neurological practice, also accounts for only a part of neurological patients and generally performs much better than the large segment of more severely affected patients placed in institutions. But to highlight the impact of even mild impairment on falls, we nevertheless felt that it was of importance to use controls with no impairment, regardless of how many percent of the population they might represent.

Then, we would also like to address the issue of small sample sizes in subgroups of neurological diseases. Some of the groups like vascular diseases, movement disorders, vertebral pain and peripheral neuropathy are adequately sized, and even outnumber subjects of single disease studies like those on peripheral neuropathy<sup>40, 42</sup>. Others, particularly the dementia group with only seven patients, is, due to the exclusion of the more affected, quite small and allows only limited extrapolation. Nevertheless it is remarkable that even here the analysis of difference reached levels of significance.

Finally, this study was performed on participants of a mid-sized central European city and surrounding countryside with patients to a large percentage of Caucasian origin which raises the question as to what extent our study results can be generalized to other geographical locations. However, almost all other studies on falls were also performed in similar settings. Given the fact that incidence figures were all in the range of previous studies conducted in other western developed countries we believe that our findings should in general well reflect falling risks in similar settings of these regions. However, due to lack of data, we cannot make any suggestions as to whether comparable results could be expected in emerging South American, Asian or African countries. There technical and cultural barriers as well as support systems probably have constituted different mobility environments for elderly people. To investigate the impact of neurological impairment on risk for falls in the elderly in these regions would be an important topic for future projects.

## CONCLUSION

It can be said that we managed to show, apparently for the first time, that even among ambulatory neurological outpatients, falls are alarmingly frequent. The aetiology of falls is multi-factorial, but the connection between falls and disturbances of the sensorimotor system frequently found in neu-

1  
2  
3  
4  
5  
6  
7  
8  
9  
10  
11  
12  
13  
14  
15  
16  
17  
18  
19  
20  
21  
22  
23  
24  
25  
26  
27  
28  
29  
30  
31  
32  
33  
34  
35  
36  
37  
38  
39  
40  
41  
42  
43  
44  
45  
46  
47  
48  
49  
50  
51  
52  
53  
54  
55  
56  
57  
58  
59  
60

rological diseases in elderly patients is of great importance. Our findings revealed that even neurological diseases not directly connected with gait and balance carry an astonishingly high risk for falls. Neurologists should therefore be aware that their patients are at high risk for falls, as any neurological deficit increases this risk, even more so if a combination of factors is present. Of course the risk has to be evaluated individually, but patients with central diseases like stroke, Parkinson's disease, dementia and epilepsy, and for repeated falls also patients with peripheral neurological disorders, require special attention. Greater disability, higher age, female gender, depression and low confidence in the sense of balance are additional contributory factors that have to be taken into account in this process. For patients with several of these factors, targeted prevention programs should be implemented, because they have been shown to generally reduce falls and injuries<sup>46</sup>. Due to the prevalence of falls and the personal and social impact they have on the lives of many, it seems important that further larger scale multicenter neuro-geriatric surveys should be performed to acquire more extensive knowledge of the effectiveness of preventive measures in patient cohorts with various neurological conditions and different degrees of disability.

#### NOTES

Acknowledgements: We acknowledge the study participants for their help and participation.

Funding and Competing interests: All authors have completed the Unified Competing Interest form and declare: no support from any organisation for the submitted work; no financial relationships with any organisations that might have an interest in the submitted work in the previous three years; and no other relationships or activities that could appear to have influenced the submitted work. Thus, neither the study nor the salary of participants was funded by any third party.

Ethical approval: This study was approved by the Ethics Committee of the Medical University Graz

Patient consent: obtained

Contributorship: B. H.: drafting/revising the manuscript, study concept or design, analysis or interpretation of data; A. P.: analysis or interpretation of data, acquisition of data of patients and controls, study concept or design; M. G.: analysis or interpretation of data, acquisition of data of patients and controls, study concept or design; A.H. acquisition of data of patients and controls; T. G.: acquisition of data, study concept or design, G. I.: critical revision of the manuscript for important intellectual content; E. H.: statistical analysis , analysis or interpretation of data, study concept or design; G.I.: drafting/revising the manuscript, study concept or design, critical revision

1  
2  
3  
4  
5  
6  
7  
8  
9  
10  
11  
12  
13  
14  
15  
16  
17  
18  
19  
20  
21  
22  
23  
24  
25  
26  
27  
28  
29  
30  
31  
32  
33  
34  
35  
36  
37  
38  
39  
40  
41  
42  
43  
44  
45  
46  
47  
48  
49  
50  
51  
52  
53  
54  
55  
56  
57  
58  
59  
60

of the manuscript for important intellectual content; F. F.: drafting/revising the manuscript, study concept or design, critical revision of the manuscript for important intellectual content; C. N. H.: drafting/revising the manuscript, study concept or design, acquisition of data, study supervision.

For peer review only



## REFERENCES

1. WHO. WHO global report on falls prevention in older age. Geneva, Switzerland: World Health Organization, 2007.
2. Gillespie LD, Robertson MC, Gillespie WJ, et al. Interventions for preventing falls in older people living in the community. *Cochrane database of systematic reviews* 2009:CD007146.
3. Luukinen H, Koski K, Hiltunen L, Kivela SL. Incidence rate of falls in an aged population in northern Finland. *Journal of clinical epidemiology* 1994;47:843-850.
4. Sattin RW, Lambert Huber DA, DeVito CA, et al. The incidence of fall injury events among the elderly in a defined population. *American journal of epidemiology* 1990;131:1028-1037.
5. Sleet DA, Moffett DB, Stevens J. CDC's research portfolio in older adult fall prevention: a review of progress, 1985-2005, and future research directions. *Journal of safety research* 2008;39:259-267.
6. Collerton J, Kingston A, Bond J, et al. The personal and health service impact of falls in 85 year olds: cross-sectional findings from the Newcastle 85+ cohort study. *PloS one* 2012;7:e33078.
7. O'Loughlin JL, Robitaille Y, Boivin JF, Suissa S. Incidence of and risk factors for falls and injurious falls among the community-dwelling elderly. *American journal of epidemiology* 1993;137:342-354.
8. Deandrea S, Lucenteforte E, Bravi F, Foschi R, La Vecchia C, Negri E. Risk factors for falls in community-dwelling older people: a systematic review and meta-analysis. *Epidemiology* 2010;21:658-668.
9. Guillochon A, Crinquette C, Gaxatte C, et al. [Neurological diseases detected in the Lille Multidisciplinary Falls Consultation]. *Revue neurologique* 2010;166:235-241.
10. Lamb SE, Ferrucci L, Volapto S, et al. Risk factors for falling in home-dwelling older women with stroke: the Women's Health and Aging Study. *Stroke; a journal of cerebral circulation* 2003;34:494-501.
11. Contreras A, Grandas F. Risk of falls in Parkinson's disease: a cross-sectional study of 160 patients. *Parkinson's disease* 2012;2012:362572.
12. Horikawa E, Matsui T, Arai H, Seki T, Iwasaki K, Sasaki H. Risk of falls in Alzheimer's disease: a prospective study. *Internal medicine* 2005;44:717-721.
13. Stolze H, Klebe S, Zechlin C, Baecker C, Friege L, Deuschl G. Falls in frequent neurological diseases--prevalence, risk factors and aetiology. *J Neurol* 2004;251:79-84.
14. Mahoney FI, Barthel DW. Functional Evaluation: The Barthel Index. *Maryland state medical journal* 1965;14:61-65.
15. Fahn S ER, ed. Unified Parkinsons Disease Rating Scale. Florham Park: Macmillan Healthcare Information, 1987.
16. Hautzinger MB, Maya. Allgemeine Depressions Skala, Manual. Göttingen: Beltz Test GmbH, 1993.
17. Radloff LS. The CES-D Scale. *Applied Psychological Measurement* 1977;1:385-401.
18. Schrag A, Barone P, Brown RG, et al. Depression rating scales in Parkinson's disease: critique and recommendations. *Movement disorders : official journal of the Movement Disorder Society* 2007;22:1077-1092.
19. Peretz C, Herman T, Hausdorff JM, Giladi N. Assessing fear of falling: Can a short version of the Activities-specific Balance Confidence scale be useful? *Movement disorders : official journal of the Movement Disorder Society* 2006;21:2101-2105.
20. Forster A, Young J. Incidence and consequences of falls due to stroke: a systematic inquiry. *Bmj* 1995;311:83-86.
21. Lord SR, Sambrook PN, Gilbert C, et al. Postural stability, falls and fractures in the elderly: results from the Dubbo Osteoporosis Epidemiology Study. *The Medical journal of Australia* 1994;160:684-685, 688-691.

- 1 22. Prudham D, Evans JG. Factors associated with falls in the elderly: a community study. *Age and ageing* 1981;10:141-146.
- 2 23. Campbell AJ, Borrie MJ, Spears GF, Jackson SL, Brown JS, Fitzgerald JL. Circumstances and consequences of falls experienced by a community population 70 years and over during a prospective study. *Age and ageing* 1990;19:136-141.
- 3 24. Blake AJ, Morgan K, Bendall MJ, et al. Falls by elderly people at home: prevalence and associated factors. *Age and ageing* 1988;17:365-372.
- 4 25. Tinetti ME, Speechley M, Ginter SF. Risk factors for falls among elderly persons living in the community. *The New England journal of medicine* 1988;319:1701-1707.
- 5 26. Campbell AJ, Borrie MJ, Spears GF. Risk factors for falls in a community-based prospective study of people 70 years and older. *Journal of gerontology* 1989;44:M112-117.
- 6 27. Hirtz D, Thurman DJ, Gwinn-Hardy K, Mohamed M, Chaudhuri AR, Zalutsky R. How common are the "common" neurologic disorders? *Neurology* 2007;68:326-337.
- 7 28. Schmid AA, Kapoor JR, Dallas M, Bravata DM. Association between stroke severity and fall risk among stroke patients. *Neuroepidemiology*;34:158-162.
- 8 29. Soriano TA, DeCherrie LV, Thomas DC. Falls in the community-dwelling older adult: a review for primary-care providers. *Clinical interventions in aging* 2007;2:545-554.
- 9 30. Fletcher PC, Hirdes JP. Risk factors for falling among community-based seniors using home care services. *The journals of gerontology Series A, Biological sciences and medical sciences* 2002;57:M504-510.
- 10 31. Yates JS, Lai SM, Duncan PW, Studenski S. Falls in community-dwelling stroke survivors: an accumulated impairments model. *Journal of rehabilitation research and development* 2002;39:385-394.
- 11 32. Balash Y, Peretz C, Leibovich G, Herman T, Hausdorff JM, Giladi N. Falls in outpatients with Parkinson's disease: frequency, impact and identifying factors. *Journal of neurology* 2005;252:1310-1315.
- 12 33. Koller WC, Glatt S, Vetere-Overfield B, Hassanein R. Falls and Parkinson's disease. *Clinical neuropharmacology* 1989;12:98-105.
- 13 34. Ashburn A, Stack E, Pickering RM, Ward CD. Predicting fallers in a community-based sample of people with Parkinson's disease. *Gerontology* 2001;47:277-281.
- 14 35. Gray P, Hildebrand K. Fall risk factors in Parkinson's disease. *The Journal of neuroscience nursing : journal of the American Association of Neuroscience Nurses* 2000;32:222-228.
- 15 36. Wood BH, Bilclough JA, Bowron A, Walker RW. Incidence and prediction of falls in Parkinson's disease: a prospective multidisciplinary study. *Journal of neurology, neurosurgery, and psychiatry* 2002;72:721-725.
- 16 37. Pickering RM, Grimbergen YA, Rigney U, et al. A meta-analysis of six prospective studies of falling in Parkinson's disease. *Movement disorders : official journal of the Movement Disorder Society* 2007;22:1892-1900.
- 17 38. Hely MA, Reid WG, Adena MA, Halliday GM, Morris JG. The Sydney multicenter study of Parkinson's disease: the inevitability of dementia at 20 years. *Movement disorders : official journal of the Movement Disorder Society* 2008;23:837-844.
- 18 39. Ryan JJ, McCloy C, Rundquist P, Srinivasan V, Laird R. Fall risk assessment among older adults with mild Alzheimer disease. *J Geriatr Phys Ther*;34:19-27.
- 19 40. DeMott TK, Richardson JK, Thies SB, Ashton-Miller JA. Falls and gait characteristics among older persons with peripheral neuropathy. *American journal of physical medicine & rehabilitation / Association of Academic Physiatrists* 2007;86:125-132.
- 20 41. Richardson JK, Ching C, Hurvitz EA. The relationship between electromyographically documented peripheral neuropathy and falls. *Journal of the American Geriatrics Society* 1992;40:1008-1012.
- 21 42. Richardson JK, Hurvitz EA. Peripheral neuropathy: a true risk factor for falls. *The journals of gerontology Series A, Biological sciences and medical sciences* 1995;50:M211-215.

- 1  
2  
3  
4  
5  
6  
7  
8  
9  
10  
11  
12  
13  
14  
15  
16  
17  
18  
19  
20  
21  
22  
23  
24  
25  
26  
27  
28  
29  
30  
31  
32  
33  
34  
35  
36  
37  
38  
39  
40  
41  
42  
43  
44  
45  
46  
47  
48  
49  
50  
51  
52  
53  
54  
55  
56  
57  
58  
59  
60
43. Flierl-Hecht A, Pfafflin M, May TW, Kohlschutter S, Hensel B, Stefan H. [Is epilepsy in the elderly overlooked? An investigation in a home for the aged]. *Der Nervenarzt* 2003;74:691-698.
44. Tinetti ME, Williams TF, Mayewski R. Fall risk index for elderly patients based on number of chronic disabilities. *The American journal of medicine* 1986;80:429-434.
45. Kose N, Cuvalci S, Ekici G, Otman AS, Karakaya MG. The risk factors of fall and their correlation with balance, depression, cognitive impairment and mobility skills in elderly nursing home residents. *Saudi medical journal* 2005;26:978-981.
46. Oliver D, Connelly JB, Victor CR, et al. Strategies to prevent falls and fractures in hospitals and care homes and effect of cognitive impairment: systematic review and meta-analyses. *Bmj* 2007;334:82.

For peer review only

## TABLES AND FIGURES

**Table 1: Neurological patients and healthy controls: General demographics and fall frequency**

|                                   | Total               |                    |         | Matched pairs       |                    |         |
|-----------------------------------|---------------------|--------------------|---------|---------------------|--------------------|---------|
|                                   | Patients<br>(n=228) | Healthy<br>(n=193) | p-value | Patients<br>(n=171) | Healthy<br>(n=171) | p-value |
| <b>Total</b>                      |                     |                    |         |                     |                    |         |
| Age                               | 74.5±7.8            | 71.4±6.8           | 0.000   | 72.2±7.0            | 72.0±6.9           | 0.839   |
| Gender (f in %)                   | 61%                 | 63%                | 0.572   | 59%                 | 59%                | 1.000   |
|                                   |                     |                    |         |                     |                    |         |
| <b>Fallers</b>                    |                     |                    |         |                     |                    |         |
| Falls (n (%))                     | 46.5%               | 16.1%              | 0.000   | 42.1%               | 16.9%              | 0.000   |
| Multiple Falls (>2 falls) (n (%)) | 28.3%               | 22.6%              | 0.528   | 26.4%               | 24.1%              | 0.815   |
| Fall frequency Index (in fallers) | 1.42±0.8            | 1.23±0.4           | 0.078   | 1.44±0.9            | 1.24±0.4           | 0.14    |

**Fall Frequency Index in neurological patients**

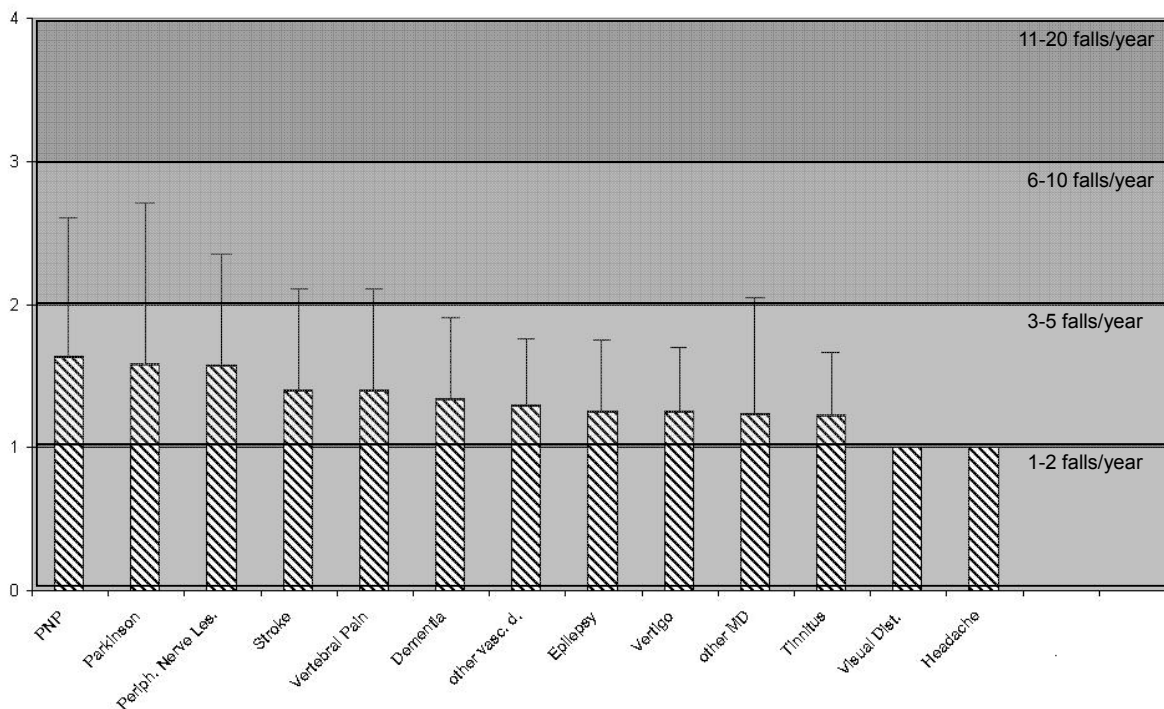

**Fig.1** Frequency of falls in neurological patients according to their neurological disorder. 1=1-2 falls in the last twelve months, 2 = 3-5, 3 = 6-10, 4 = 11-20, and 5 = more than 20.

**Abbreviations:** PNP = peripheral neuropathy, Periph. nerve les. = peripheral nerve lesion, other MD = other movement disorders, other vasc. d. = other vascular disease, Visual.Dist. = visual disturbances

### One year fall incidence in common neurological disorders

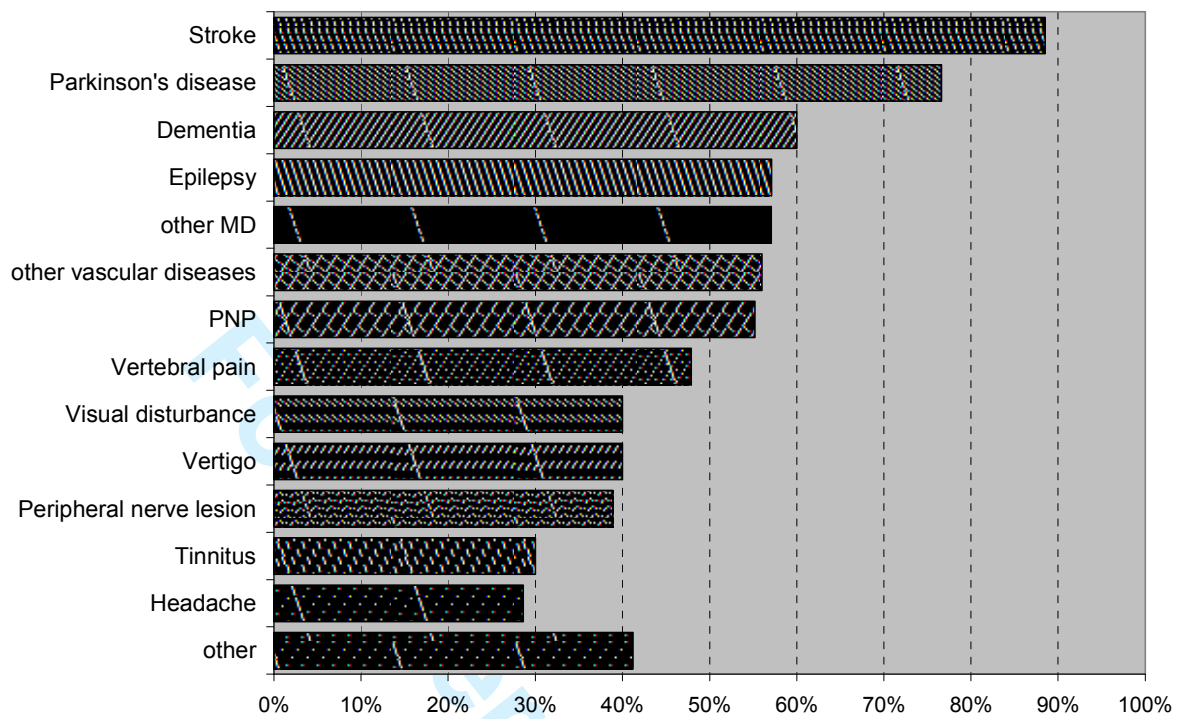

**Fig.2** Difference in frequency of having at least one fall within the twelve-month period for patients suffering from the 13 most commonly encountered neurological disorders.

**Table 2: Neurological Patient groups: General demographics and fall risk**

| Diagnosis       | Age      | Bartel | Total<br>(n) | Falls<br>(n (%)) | Multiple<br>Falls<br>(n (%)) | Fall fre-<br>quency* (in<br>fallers) | Risk of falling |              |         |
|-----------------|----------|--------|--------------|------------------|------------------------------|--------------------------------------|-----------------|--------------|---------|
|                 |          |        |              |                  |                              |                                      | OR              | CI           | p-value |
| Stroke          | 82,7±2,3 | 99,76  | 26           | 23 (89%)         | 7 (30%)                      | 1,39±0,72                            | 40,1            | (11,3-141,7) | 0.000   |
| Parkinson D     | 74,8±8,1 | 99,79  | 47           | 36 (77%)         | 11 (31%)                     | 1,58±1,13                            | 17,1            | (7,9-37,2)   | 0.000   |
| Dementia        | 77,5±9,2 | 99,77  | 7            | 3 (60%)          | 1 (33%)                      | 1,33±0,58                            | 7,8             | (1,3-48,9)   | 0.01    |
| Epilepsy        | 71,0±8,2 | 99,78  | 7            | 4 (57%)          | 1 (25%)                      | 1,25±0,5                             | 7,0             | (1,5-32,7)   | 0.005   |
| other MD        | 74,3±7,9 | 100    | 14           | 8 (57%)          | 1 (13%)                      | 1,23±0,82                            | 7,0             | (2,3-21,5)   | 0.000   |
| other vasc. D   | 74,8±8,1 | 99,79  | 25           | 14 (56%)         | 4 (29%)                      | 1,29±0,47                            | 6,7             | (2,8-16,0)   | 0.000   |
| PNP             | 71,0±8,1 | 99,78  | 58           | 32 (55%)         | 13 (43%)                     | 1,63±0,98                            | 6,4             | (3,4-12,3)   | 0.000   |
| Vertebral Pain  | 76,8±9,1 | 99,75  | 48           | 23 (48%)         | 7 (30%)                      | 1,39±0,72                            | 4,8             | (2,4-9,5)    | 0.000   |
| Visual Disturb. | 69,5±0,7 | 99,77  | 10           | 4 (40%)          | 0 (0%)                       | 1±0                                  | 3,5             | (0,9-13,1)   | 0.051   |
| Vertigo         | 72,0±8,1 | 99,75  | 30           | 12 (40%)         | 3 (25%)                      | 1,25±0,45                            | 3,5             | (1,5-8,0)    | 0.002   |
| P. Nerve Les.   | 66,0±8,1 | 99,79  | 18           | 7 (39%)          | 3 (43%)                      | 1,57±0,79                            | 3,3             | (1,2-9,2)    | 0.016   |
| Tinnitus        | 74,3±8,4 | 99,76  | 30           | 9 (30%)          | 2 (22%)                      | 1,22±0,44                            | 2,2             | (0,9 - 5,3)  | 0.064   |
| Headache        | 74,8±8,1 | 99,79  | 14           | 4 (29%)          | 0 (0%)                       | 1,0±0.0                              | 2,1             | (0,6-7,1)    | 0,228   |
| Other           | 79,4±7,1 | 99,74  | 34           | 14 (41%)         | 4 (29%)                      | 1,29±0,47                            | 3,7             | (1,7 - 8,0)  | 0.001   |

\*) Fall frequency index: 1=1-2 falls in the last twelve months, 2 = 3-5 falls in the last twelve months, 3 = 6-10 falls in the last twelve months, 4 = 11-20 falls in the last twelve months, and 5 = more than 20 falls in the last twelve months.

1  
2  
3  
4  
5  
6  
7  
8  
9  
10  
11  
12  
13  
14  
15  
16  
17  
18  
19  
20  
21  
22  
23  
24  
25  
26  
27  
28  
29  
30  
31  
32  
33  
34  
35  
36  
37  
38  
39  
40  
41  
42  
43  
44  
45  
46  
47  
48  
49  
50  
51  
52  
53  
54  
55  
56  
57  
58  
59  
60

For peer review only



a) Balance confidence and occurrence of falls

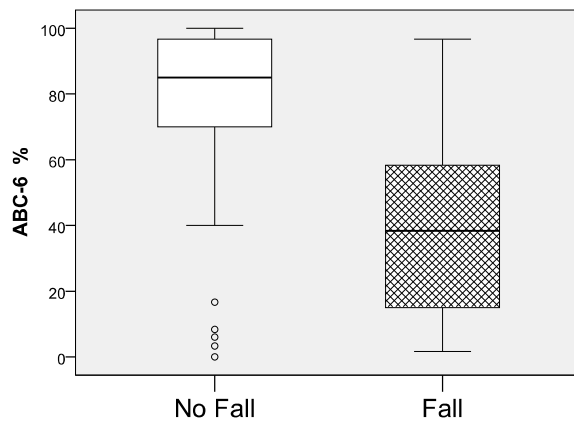

b) Neurological comorbidities and falls

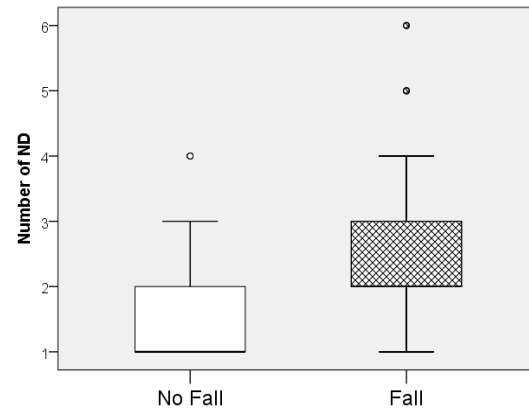

**Fig.3a,b** Differences in Activities-Specific Balance Confidence (ABC) scores (a) and number of neurological diseases (ND) (b) indicate that neurological patients with falls as compared to those without have lower confidence in their balance and a higher number of concomitant neurological diseases.

## STROBE checklist - observational studies

|                           | Item No | Recommendation                                                                                                                                                                                                                                                                                                                                                                                                                                                            |   |
|---------------------------|---------|---------------------------------------------------------------------------------------------------------------------------------------------------------------------------------------------------------------------------------------------------------------------------------------------------------------------------------------------------------------------------------------------------------------------------------------------------------------------------|---|
| <b>Title and abstract</b> |         |                                                                                                                                                                                                                                                                                                                                                                                                                                                                           |   |
|                           | 1       | (a) Indicate the study's design with a commonly used term in the title or the abstract                                                                                                                                                                                                                                                                                                                                                                                    | √ |
|                           |         | (b) Provide in the abstract an informative and balanced summary of what was done and what was found                                                                                                                                                                                                                                                                                                                                                                       | √ |
| <b>Introduction</b>       |         |                                                                                                                                                                                                                                                                                                                                                                                                                                                                           |   |
| Background/rationale      | 2       | Explain the scientific background and rationale for the investigation being reported                                                                                                                                                                                                                                                                                                                                                                                      | √ |
| Objectives                | 3       | State specific objectives, including any prespecified hypotheses                                                                                                                                                                                                                                                                                                                                                                                                          | √ |
| <b>Methods</b>            |         |                                                                                                                                                                                                                                                                                                                                                                                                                                                                           |   |
| Study design              | 4       | Present key elements of study design early in the paper                                                                                                                                                                                                                                                                                                                                                                                                                   | √ |
| Setting                   | 5       | Describe the setting, locations, and relevant dates, including periods of recruitment, exposure, follow-up, and data collection                                                                                                                                                                                                                                                                                                                                           | √ |
| Participants              | 6       | (a) <i>Cohort study</i> ? Give the eligibility criteria, and the sources and methods of selection of participants. Describe methods of follow-up<br><i>Case-control study</i> ? Give the eligibility criteria, and the sources and methods of case ascertainment and control selection. Give the rationale for the choice of cases and controls<br><i>Cross sectional study</i> ? Give the eligibility criteria, and the sources and methods of selection of participants | √ |
|                           |         | (b) <i>Cohort study</i> ? For matched studies, give matching criteria and number of exposed and unexposed<br><i>Case-control study</i> ? For matched studies, give matching criteria and the number of controls per case                                                                                                                                                                                                                                                  | √ |
| Variables                 | 7       | Clearly define all outcomes, exposures, predictors, potential confounders, and effect modifiers. Give diagnostic criteria, if applicable                                                                                                                                                                                                                                                                                                                                  | √ |
| Data sources/measurement  | 8*      | For each variable of interest, give sources of data and details of methods of assessment (measurement). Describe comparability of assessment methods if there is more than one group                                                                                                                                                                                                                                                                                      | √ |
| Bias                      | 9       | Describe any efforts to address potential sources of bias                                                                                                                                                                                                                                                                                                                                                                                                                 | √ |
| Study size                | 10      | Explain how the study size was arrived at                                                                                                                                                                                                                                                                                                                                                                                                                                 | √ |
| Quantitative variables    | 11      | Explain how quantitative variables were handled in the analyses. If applicable, describe which groupings were chosen and why                                                                                                                                                                                                                                                                                                                                              | √ |
| Statistical methods       | 12      | (a) Describe all statistical methods, including those used to control for confounding                                                                                                                                                                                                                                                                                                                                                                                     | √ |
|                           |         | (b) Describe any methods used to examine subgroups and interactions                                                                                                                                                                                                                                                                                                                                                                                                       | √ |
|                           |         | (c) Explain how missing data were addressed                                                                                                                                                                                                                                                                                                                                                                                                                               | √ |
|                           |         | (d) <i>Cohort study</i> ? If applicable, explain how loss to follow-up was addressed<br><i>Case-control study</i> ? If applicable, explain how matching of cases and controls was addressed<br><i>Cross sectional study</i> ? If applicable, describe analytical methods taking account of sampling strategy                                                                                                                                                              | √ |
|                           |         | (e) Describe any sensitivity analyses                                                                                                                                                                                                                                                                                                                                                                                                                                     | √ |
| <b>Results</b>            |         |                                                                                                                                                                                                                                                                                                                                                                                                                                                                           |   |
| Participants              | 13*     | (a) Report numbers of individuals at each stage of study? eg numbers potentially eligible, examined for eligibility, confirmed eligible, included in the study, completing follow-up, and analysed                                                                                                                                                                                                                                                                        | √ |
|                           |         | (b) Give reasons for non-participation at each stage                                                                                                                                                                                                                                                                                                                                                                                                                      | √ |
|                           |         | (c) Consider use of a flow diagram                                                                                                                                                                                                                                                                                                                                                                                                                                        | - |
| Descriptive data          | 14*     | (a) Give characteristics of study participants (eg demographic, clinical, social) and information on exposures and potential confounders                                                                                                                                                                                                                                                                                                                                  | √ |
|                           |         | (b) Indicate number of participants with missing data for each variable of interest                                                                                                                                                                                                                                                                                                                                                                                       | √ |

|                          | Item No | Recommendation                                                                                                                                                                                             |             |
|--------------------------|---------|------------------------------------------------------------------------------------------------------------------------------------------------------------------------------------------------------------|-------------|
|                          |         | (c) <i>Cohort study</i> ? Summarise follow-up time (eg average and total amount)                                                                                                                           | √           |
| Outcome data             | 15*     | <i>Cohort study</i> ? Report numbers of outcome events or summary measures over time                                                                                                                       | <i>n.a.</i> |
|                          |         | <i>Case-control study</i> ? Report numbers in each exposure category, or summary measures of exposure                                                                                                      | √           |
|                          |         | <i>Cross sectional study</i> ? Report numbers of outcome events or summary measures                                                                                                                        | <i>n.a.</i> |
| Main results             | 16      | (a) Report the numbers of individuals at each stage of the study? eg numbers potentially eligible, examined for eligibility, confirmed eligible, included in the study, completing follow-up, and analysed | √           |
|                          |         | (b) Give reasons for non-participation at each stage                                                                                                                                                       | √           |
|                          |         | (c) Consider use of a flow diagram                                                                                                                                                                         | -           |
| Other analyses           | 17      | Report other analyses done? eg analyses of subgroups and interactions, and sensitivity analyses                                                                                                            | √           |
| <b>Discussion</b>        |         |                                                                                                                                                                                                            |             |
| Key results              | 18      | Summarise key results with reference to study objectives                                                                                                                                                   | √           |
| Limitations              | 19      | Discuss limitations of the study, taking into account sources of potential bias or imprecision. Discuss both direction and magnitude of any potential bias                                                 | √           |
| Interpretation           | 20      | Give a cautious overall interpretation of results considering objectives, limitations, multiplicity of analyses, results from similar studies, and other relevant evidence                                 | √           |
| Generalisability         | 21      | Discuss the generalisability (external validity) of the study results                                                                                                                                      | √           |
| <b>Other information</b> |         |                                                                                                                                                                                                            |             |
| Funding                  | 22      | Give the source of funding and the role of the funders for the present study and, if applicable, for the original study on which the present article is based                                              | √           |



**The impact of various neurological disorders on the risk for falls in the community dwelling elderly: a case controlled study**

|                                 |                                                                                                                                                                                                                                                                                                                                                                                                                                                                                                                                           |
|---------------------------------|-------------------------------------------------------------------------------------------------------------------------------------------------------------------------------------------------------------------------------------------------------------------------------------------------------------------------------------------------------------------------------------------------------------------------------------------------------------------------------------------------------------------------------------------|
| Journal:                        | <i>BMJ Open</i>                                                                                                                                                                                                                                                                                                                                                                                                                                                                                                                           |
| Manuscript ID:                  | bmjopen-2013-003367.R1                                                                                                                                                                                                                                                                                                                                                                                                                                                                                                                    |
| Article Type:                   | Research                                                                                                                                                                                                                                                                                                                                                                                                                                                                                                                                  |
| Date Submitted by the Author:   | 20-Sep-2013                                                                                                                                                                                                                                                                                                                                                                                                                                                                                                                               |
| Complete List of Authors:       | Homann, Barbara; Medical University Graz, Neurology<br>Plaschg, Annemarie; Medical University Graz, Neurology<br>Grundner, Marion; Medical University Graz, Neurology<br>Haubenhofner, Alice; Medical University Graz, Neurology<br>Griedl, Theresa; Medical University Graz, Neurology<br>Ivanic, Gerd; Private Paracelsus Medical University Salzburg, Orthopedic Surgery<br>Hofer, Edith; Medical University Graz, Neurology<br>Fazekas, Franz; Medical University Graz, Neurology<br>Homann, Carl; Medical University Graz, Neurology |
| <b>Primary Subject Heading</b>: | Neurology                                                                                                                                                                                                                                                                                                                                                                                                                                                                                                                                 |
| Secondary Subject Heading:      | Geriatric medicine, Public health, Neurology                                                                                                                                                                                                                                                                                                                                                                                                                                                                                              |
| Keywords:                       | Falls, fall risk, elderly, community dwelling, neurological disorders                                                                                                                                                                                                                                                                                                                                                                                                                                                                     |
|                                 |                                                                                                                                                                                                                                                                                                                                                                                                                                                                                                                                           |

SCHOLARONE™  
Manuscripts

only

1  
2  
3  
4 **The impact of neurological disorders on the risk for falls in the community**  
5  
6 **dwelling elderly: a case controlled study**  
7  
8  
9

10  
11  
12 Homann, Barbara<sup>1</sup>; Plaschg, Annemarie<sup>1</sup>; Grundner, Marion<sup>1</sup>; Griedl, Theresa<sup>1</sup>; Ivanic, Gerd<sup>2</sup>;  
13  
14 Hofer, Edith<sup>1</sup>; Fazekas, Franz<sup>1</sup>; Homann, Carl Nikolaus<sup>1</sup>  
15

16  
17 <sup>1</sup>) Medical University Graz, Dept of Neurology, <sup>2</sup>) Paracelsus Medical University Salzburg, Dep. of  
18  
19 Orthopaedic Surgery  
20  
21  
22  
23  
24  
25  
26  
27  
28  
29  
30  
31  
32  
33  
34  
35  
36  
37  
38  
39  
40  
41  
42  
43  
44  
45  
46  
47  
48  
49  
50  
51  
52  
53  
54  
55  
56  
57  
58  
59  
60

**ABSTRACT**

**Objectives:** Owing to a lack of data, our aim was to evaluate and compare the impact of various common neurological diseases on the risk for falls in independent community dwelling senior citizens.

**Design:** Prospective case controlled study

**Setting:** General Hospital

**Participants:** Out of 298 consecutive patients and 214 controls enrolled, 228 patients (aged 74.5±7.8; 61% women) and 193 controls (aged 71.4±6.8; 63% women) were included. Exclusion criteria for patients were severe disability, disabling general condition, or severe cognitive impairment, for controls any history of neurological disorders or disabling medical conditions, and for both age below 60 years. A matching process led to 171 age- and gender-matched pairs of neurological patients and healthy controls.

**Main outcome measures:** One-year incidence of falls based on patients' 12 month recall; motor and non- motor function tests to detect additional risk factors.

**Results:** 46% of patients and 16% of controls fell at least once a year. Patients with stroke (89%), Parkinson's disease (77%), dementia (60%) or epilepsy (57%) had a particularly high **proportion of fallers**, but even **subgroups of** patients with the least fall-associated neurological diseases like tinnitus (30%) and headache (28%) had a higher **proportion of fallers** than the control group. Neuropathies, peripheral nerve lesions and Parkinson's disease were predisposing to recurrent falls. A higher number of neurological comorbidities ( $p<0.001$ ), lower Barthel Index values ( $p<0.001$ ), lower Activities-Specific Balance Confidence scores ( $p<0.001$ ), and higher Center of Epidemiological Studies Depression scores ( $p<0.001$ ) as well as higher age ( $p<0.001$ ) and female gender ( $p=0.003$ ) proved to further increase the risk of falls.

**Conclusions:** Physicians should be aware that all elderly neurological patients seen in outpatient settings are potentially at high risk for falls; they should query them routinely about previous falls and fall risks and advise them on preventive strategies.

## Article summary

### *Article focus*

- Previous studies have shown that falls in the elderly are common and substantial amount of data on single neurological conditions like stroke and Parkinson's disease suggest that neurological impairments further increase the risk for falls.
- However, little is known on the influence of a broad range of neurological diseases and how they differ among each other.
- The aim of this study is to provide comparative data on the risk of falling in ambulatory elderly subjects afflicted with various common neurological diseases and to evaluate the role of additional risk factors.

### *Key messages*

- The results of our study suggest that all elderly neurological patients even when still ambulatory carry a heightened risk for falls.
- The impact differs according to disease but those with impairments of the sensorimotor system are particularly endangered. However our findings investigating yet unstudied populations, eg, such as headache revealed that even neurological disorders not directly connected with gait and balance carry an unexpected high risk for falls and that there is a cumulative effect of more than one neurological condition on the risk of falls.

### *Strengths and limitations of this study*

- Strengths of this study include the prospective study design, the number of standardised outcome measures, the standardised assessment of neurological patients and the thorough examination and inclusion of healthy controls.
- The following limitations should be considered: although the design is prospective, the falls history is retrospective, based on patients' recall over 12 months, therefore underreporting of cases is possible. Small sample sizes in some of the subgroups of neurological diseases. Participants were mostly of Caucasian origin and there was a high drop-out rate, which may limit the generalisability of the results to other populations.

## INTRODUCTION

Due to budget cuts and austerity measures the costs of accidents and falls have come into the spotlight of health policy makers. The World Health Organisation too has recently made fall prevention in the elderly one of its top priorities. The WHO Global Report on Falls Prevention in Older Age states that due to the high percentage of elderly people worldwide the economic and societal burden of falls will increase by epidemic proportions in all parts of the world over the next few decades, unless concerted action is taken in a systematic and proactive fashion by policy makers, researchers and practitioners<sup>1</sup>.

It is known that falls in the elderly are common and have a great impact on life and wellbeing. Studies have shown that around 30% of subjects of 65 years plus had a fall during the last 12 months<sup>2</sup> with 10% sustaining severe injuries<sup>3</sup>. Injuries are the fifth most frequent cause of death in the elderly and up to 70% of these injuries were caused by falls<sup>4</sup>. Elderly persons surviving a fall experience significant morbidity: as many as one-third require assistance in their activities of daily living for as long as 6 months<sup>5</sup>. Lasting disabilities are also common as many do not reach pre-fall physical functional states, resulting in increased dependency and (in up to 50%) a transfer to a care facility<sup>4</sup>. Associated as they are with considerable mortality as well as psychological and physical morbidity, these falls lead to increased dependence upon social support and health care services, with high economic impact on the social and health care system<sup>6</sup>. But there is substantial evidence that falls can be prevented when subjects at risk are identified and enrolled in targeted prevention programs.

Several risk factors like sociodemographic variables, physical activity, alcohol consumption, acute and chronic health problems, dizziness, mobility, and medications have been documented repeatedly<sup>7</sup>. Neurological impairments in the elderly are also thought to increase the risk for falls, though evidence for this is mostly derived indirectly from investigations into the causes of falls in the elderly<sup>8</sup>. These studies show that patients admitted to hospitals due to falls frequently also suffer from neurological disorders. Data derived from a multidisciplinary fall consultation survey suggest that in two out of three patients, potentially fall inducing neurological disorders were present, most of them (85%) previously undiagnosed<sup>9</sup>.

There is, however, substantially less known about the risk for falls in patients afflicted with various common neurological diseases. While there is already a substantial amount known about increased risk of falls in the stroke<sup>10</sup>, Parkinson's disease<sup>11</sup> or dementia<sup>12</sup> population, to our knowledge there is only one comparative study investigating falls in patients with of a broad range of neurological diseases. This study by Stolze, however, was conducted on patients with neurological diseases severe enough to require hospital admission<sup>13</sup>. To date little is known about the risk of falling in



1 independent, community dwelling senior citizens afflicted with neurological diseases treatable in  
2 outpatient facilities. Studies targeting this issue so far either did not use a control group or, if they  
3 did, the absence of neurological signs and symptoms in this cohort was not guaranteed.  
4

5 Because falls in community dwelling elderly patients are assumed to be both prevalent and  
6 preventable, neurologists in outpatient settings need a sound base to identify patients with the  
7 highest risk, to reduce not only the number of falls and the suffering they entail, but also overall  
8 health care costs. Our study thus aimed to investigate the risk of falls in elderly patients with  
9 various neurological diseases that are commonly encountered in outpatient facilities. We  
10 hypothesized that even in community dwelling elderly patients, the impact one or more  
11 neurological diseases on top of an already increased propensity for falls is substantial; that patients  
12 with certain diseases like stroke or Parkinson's disease are particularly at risk; and that affliction  
13 with more than one of these high risk diseases increases the risk even further.  
14  
15  
16  
17  
18  
19  
20  
21  
22  
23  
24  
25  
26

## 27 **PARTICIPANTS AND METHODS**

### 28 **Setting**

29 Data were collected at the general outpatient department of the Department of Neurology of the  
30 University Hospital in Graz, Austria. As visits to the outpatient department do not require specialist  
31 referrals, the disease spectrum largely resembles that seen by community based neurologists.  
32  
33  
34  
35  
36  
37  
38  
39

### 40 **Selection of participants and baseline examination**

41 Physically independent community dwelling patients treated in our general neurological outpatient  
42 clinic aged 60 years and over were included in the study. Patients were all seen consecutively by  
43 one and the same consultant (CNH) in the period from July 2007 to May 2008, what also explains  
44 the study size. Severely disabled patients who were no longer able to walk unaided or were in poor  
45 general condition, be it for reasons of neurological or other medical disease, were excluded from the  
46 study. Cognitive impairment to an extent that an interview would no longer yield reliable results  
47 (MMSE $\leq$ 12), was also a cause for exclusion. All neurological patients included underwent a full  
48 neurological workup with an extensive history to detect signs of past and present neurological  
49 disorders. For the sake of uniformity, both the workup and history were structured and followed the  
50 study protocol.  
51  
52  
53  
54  
55  
56  
57

58 As healthy controls, individuals from the general public out of the same catchment area as cases  
59  
60

1 were enrolled. They were recruited among friends and acquaintances of the author and his co-  
2 workers who were aged 60+ and without any history of neurological disorders or other disabling  
3 medical conditions like heart failure, chronic obstructive pulmonary disease or rheumatoid arthritis  
4 severe enough to cause limitation of ordinary physical activity. Examination and history were as per  
5 study protocol, whereby special emphasis was placed on identifying symptoms and signs of  
6 Parkinson's disease, peripheral neuropathy, stroke or epilepsy, as well as minor sensory-motor  
7 deficits and gait or balance impairments. Controls with even subtle neurological pathologies were  
8 excluded. Although not routinely screened for cognitive deficits, obvious signs of or a known  
9 diagnosis of dementia or even of mild cognitive impairment was a reason for exclusion.

10 A telephone follow-up was scheduled 12 months after the baseline outpatient visit; it was carried  
11 out by one of two examiners (AP, MG) following a predefined format and only subjects who had  
12 given verbal informed consent at the start of the telephone contact were interviewed.

13 The first section of the interview questionnaire covered demographic data like age and place of  
14 residence. The residence category had 5 subsections on size and traffic infrastructure, with group 1  
15 being the state capital and group 5 a small town in the periphery. Next were specific questions on  
16 fall frequency, physical disability, depression and confidence in one's own sense of balance. The  
17 final section dealt with risk situations (like when using public transport) and general mobility  
18 issues, whereby the latter are not included in this publication.

19 The survey, including all details concerning the selection process, was approved by the Ethics  
20 Committee of the Medical University Graz.

### 21 **Frequency of falls**

22 In the main section of the questionnaire patients and healthy controls were asked whether they had  
23 had a fall during the past 12 months and, if yes, how many times they had fallen. The yearly fall  
24 incidence was graded according to the fall frequency index into 5 categories. Category one means  
25 1-2 falls, category two 3-5, three 6-10, four 11-20, and five more than 20 falls.

### 26 **Disability**

27 The Barthel Index <sup>14</sup>, a disability scale with scores from 0 (completely dependent) to 100  
28 (completely independent) was used to evaluate the functional status of all neurological patients.

29 Parkinson patients were also rated according to the the Schwab and England Scale and Part II of the  
30 Unified Parkinson's Disease Rating Scale (UPDRS) <sup>15</sup>.

### 31 **Depression**

32 To determine the grade of depression, the Allgemeine Depressionsskala Kurzform (ADS-K) <sup>16</sup>, the  
33 German short form of the Center of Epidemiological Studies Depression Scale (CES-D) <sup>17</sup> was  
34

1 used. It is known to be particularly well suited for the use in the elderly and in patients with certain  
2 neurological disabilities<sup>18</sup>.  
3  
4

### 5 6 7 **Balance Confidence**

8  
9 We also rated the patients' confidence in their own sense of balance with the Activities-Specific  
10 Balance Confidence Scale (ABC -6 scale)<sup>19</sup>. Participants judged their confidence in performing  
11 specific activities without loss of balance or being unsteady on a scale ranging from 0% (no  
12 confidence at all) to 100% (completely confident). The total score was then computed as an average  
13 of the subscores.  
14  
15  
16  
17

### 18 19 **Statistical analysis**

20  
21 The primary outcomes was falls, based on participant recall over the prior 12 months. Falls were  
22 defined according to the WHO definition<sup>1</sup> as an event which results in a person coming to rest  
23 inadvertently on the ground or floor or other lower level irrespective of cause, thus including e.g.  
24 falls from epileptic seizures. The one-year incidence of falls was calculated for both healthy elderly  
25 individuals and the whole sample of neurological patients. Further calculations were done for  
26 subsamples of 13 neurological disorders with the highest prevalence ( $n \geq 7$ ). The diagnoses were  
27 based on the ICD-10 system for classification of diseases. The means and standard deviations were  
28 calculated for numerical values like the rating scale scores. For the identification of fall related risk  
29 factors, correlations (Kendall's  $\tau$ -B), and for the individual neurological disorders, odds ratios were  
30 computed ( $\alpha$ -level of significance  $p < 0.05$ ). Differences between neurological patients and healthy  
31 controls were tested with the Mann-Whitney U test or the chi-square test ( $\alpha$ -levels of significance  $p$   
32  $< 0.05$ ). To insure comparability of cohorts we formed age- and gender-matched pairs of patients  
33 and control subjects. For the matching process we used alphabetical lists of names of male and  
34 female neurological patients and likewise of healthy controls, sorted by age. Then working down  
35 the list we searched manually to find for each neurological patient one control subject of the same  
36 age. If no match was found then we looked for a control that was one year younger, then one year  
37 older, then two years and finally three years younger respectively older. Only complete sets of data  
38 were included in the calculations and no approximates to replace missing values were computed.  
39 Calculations were performed with SPSS® statistical software PASW statistics 18. Potential bias  
40 and how it was addressed will be dealt with in the section on limitations.  
41  
42  
43  
44  
45  
46  
47  
48  
49  
50  
51  
52  
53  
54  
55  
56  
57

## 58 **RESULTS**

1  
2  
3 During a period of 10 months we recruited 298 mobile neurological outpatients and 214 healthy  
4 controls aged 60 years and over. In the group of healthy controls 21 patients initially recruited could  
5 not be included in the study due to neurological symptoms and signs, or a history of a neurological  
6 disorder. In the group of neurological patients another 70 patients had to be excluded from the study  
7 because at the time of the interview they (n=10) or their caregiver (n=6) requested exclusion, the  
8 telephone number on record had been disconnected (n=24), all attempts to contact them failed  
9 (n=11), they had become so disabled that they could no longer participate in the survey (n=10), they  
10 had died (n=4), or for other reasons (n=5).

11  
12 Prior to recruitment, twenty patients were excluded because of inability to walk unaided and one  
13 due to severe dementia. Of those that met inclusion criteria five rejected enrolment and six other  
14 patients could not be enrolled due to inadequate language skills (n=1), severe aphasia (n=1), or  
15 severe presbycusis (n=4).

16  
17 The statistical analysis thus covered 228 neurological outpatients (aged  $74.5 \pm 7.8$ ; 61% women)  
18 and 193 healthy controls. The matching process led to 171 pairs of neurological patients and  
19 healthy controls, 101 women and 70 men in each group, aged 72.0 and 72.2 years, respectively. The  
20 details of these subjects are summarized in Table 1.

### 21 22 23 24 25 26 27 28 29 30 31 32 33 34 35 **Incidence of falls in neurological patients and healthy controls**

36 One hundred and six (46.5%) neurological patients but only 31 (16.1%) healthy controls had fallen  
37 at least once ( $\text{Chi}^2=43.4$ ;  $p < 0.001$ ) during this one-year period. Out of 126 neurological patients  
38 experiencing falls, 76 (71.7%) fell once or twice, 22 (20.8%) three to five times, three (2.8%) six to  
39 nine times, three (2.8%) 11-20 times and two (1.9%) more than 20 times. In the group of healthy  
40 controls, out of 76 individuals with a history of falls, 24 (77.4%) fell once or twice, and seven  
41 (22.6%) three to five times, but none more often than that. In the matched cohorts as well falls were  
42 more frequent in neurological patients (42.1%) than in healthy controls (16.9%) ( $\text{Chi}^2=26.3$ ;  
43  $p < 0.001$ ). (Table 1)

44  
45  
46  
47  
48  
49  
50  
51  
52  
53 The mean age of individuals with a history of falls as compared to those without was higher both in  
54 the neurologically affected (fallers:  $76.7 \pm 7.6$  vs. nonfallers:  $72.6 \pm 7.5$ ;  $p < 0.001$ ) and in healthy  
55 controls (fallers:  $73.3 \pm 6.5$  vs. nonfallers:  $71.0 \pm 6.9$ ;  $p = 0.040$ ). In the group of neurological  
56 patients, 75 of 106 fallers (71%) were female, but only 31 (29%) were male ( $\text{Chi}^2=8.675$ ;  $p = 0.003$ ).

1 Similarly, in the group of healthy controls a higher percentage of fallers was female, with 23 out of  
2 31 (74%), but this did not reach significance ( $\text{Chi}^2=1.915$ ;  $p=0.166$ ).

3  
4  
5 The occurrence of falls in neurological patients was independent of where they lived. For healthy  
6 controls, however, their place of residence had an influence, in that subjects living in more rural  
7 environments were more prone to falls ( $\Gamma\text{-B}=0.217$ ;  $p<0.001$ ).

8  
9  
10 Multiple falls occurred particularly in patients with peripheral neuropathy (43%), peripheral nerve  
11 lesion (43%), dementia (33%), Parkinson's disease (30%), stroke (30%) and vertebral pain (30%).  
12 The average fall frequency index in this group of five diseases ranged from 1.63 (peripheral  
13 neuropathy) to 1.33 (dementia). The proportion of fallers in each index category is shown for all  
14 these diseases in Fig. 1.  
15  
16  
17  
18  
19  
20  
21  
22

### 23 **Risk factors for falls in neurological patients**

24 The type of neurological disease the patient was afflicted with influenced the proportion of fallers in  
25 that patients post stroke (89%), with Parkinson's disease (77%), dementia (60%) and epilepsy (57%)  
26 had the highest frequency of falls. The lowest likelihood of falls was found in patients suffering  
27 from tinnitus (30%) and headache (28%), but was still higher than that of the average healthy  
28 control (16.1%). (Fig. 2)  
29  
30  
31  
32  
33  
34  
35

36 The respective odds ratios are shown in table 2 and range from 40.1 (stroke) to 2.1 (headache) and  
37 the relative risk of falling ranges between 5.5 for stroke patients and 1.8 for patients with headache.

38 No specific combination of two or three neurological diseases characterized by substantial gait or  
39 balance impairment but any accumulation of several neurological diseases regardless of their  
40 influence on gait or balance was able to cause a significant raise in falls ( $\Gamma\text{-B}=0.303$ ;  $p<0.001$ ).

41 Other risk factors for falls in neurological patients were female gender ( $\Gamma\text{-B}=0.195$ ;  $p=0.003$ ),  
42 higher age ( $\Gamma\text{-B}=0.217$ ;  $p<0.001$ ), higher disability or disease severity as measured by the Barthel  
43 Index ( $\Gamma\text{-B}=-0.232$ ;  $p<0.001$ ). Higher disability scores in Parkinson patients expressed by higher  
44 UPDRS II (activities of daily living) scores ( $\Gamma\text{-B}=-0.238$ ;  $p=0.062$ ) and higher Schwab & England  
45 scores ( $\Gamma\text{-B}=-0.235$ ;  $p=0.070$ ) resulted in a trend toward more frequent falls. Severity of depression  
46 as reflected by a higher ADS score ( $\Gamma\text{-B}=0.329$ ;  $p<0.001$ ) and low balance confidence reflected by  
47 higher ABC scores ( $\Gamma\text{-B}=-0.384$ ;  $p<0.001$ ) were also identified as risk factors (Fig. 3).  
48  
49  
50  
51  
52  
53  
54  
55  
56  
57  
58  
59  
60

## DISCUSSION

### Incidence of falling

Our study suggests that even in patients mildly to moderately affected by neurological impairments the incidence of falls was three times higher than in subjects without any neurological symptoms or signs. To our knowledge this is the first survey conducted on elderly neurological outpatients and controls proven to be without neurological impairments, but the extent of this increased relative risk in neurological patients was unexpected, and resulted from low incidence figures in the group of controls and particularly high figures in the patient group.

In our group of healthy controls the 12-month incidence (16.1 %) was considerably lower than in previous population based data serving as a reference for previous studies<sup>20</sup>. Literature suggests that a third to one half of the community dwelling population of 60+ experience falls each year. For a group of 1762 subjects 60+ years of age, Lord reported a yearly incidence rate of falls of 28%<sup>21</sup>. In individuals of 65 years and older Prudham found in his survey conducted on 2793 individuals that 28% experienced one or more falls in the last year<sup>22</sup>. In O'Loughlin's group of 409 it was 29%<sup>7</sup>, in Campbell's group of 533, 33%<sup>23</sup>, and in Blake's group of 1042, 35%.<sup>24</sup> Luukinen's group of 833 individuals aged 70+ showed a 30% annual rate of falls<sup>3</sup> and Tinetti's group of 336 aged 75+ showed a rate of 32%<sup>25</sup>. For the very old, Campbell found in a community-based prospective study based on 761 subjects that half of those age 80 years and over have a fall every year<sup>26</sup>. This incidence rate, twice or three times that of our figures, did not surprise us. Population-based data of elderly individuals inevitably include a considerable number of patients suffering from neurological diseases or other forms of gait or balance problems. Many of these neurological disorders like stroke, Alzheimer's disease or Parkinson's disease are typical diseases of the elderly and others like epilepsy or traumatic brain injury also have a second peak in higher age<sup>27</sup>. This shows that it can be of advantage, when studying groups of elderly patients, to have a truly healthy control group, as in our survey.

Our study also shows that half of all ambulatory neurological patients had had at least one fall within the last 12 month. As to our knowledge this is the first survey of neurological outpatients, the lack of comparative data gave us no choice but to relate our findings to Stolze's data on neurological inpatients showing, much to our surprise, a falling incidence as low as 34%<sup>13</sup>. One would have assumed that Stolze's patients, who required inpatient treatment for their neurological conditions, would be more severely disabled and thus more prone to falls than outpatients. It also appears contradictory our findings that indicators of disease severity like the Barthel index and the UPDRS II correlated positively with the incidence of falls. Several studies further support this concept by stat-

1 ing that the more severely affected patients are, the higher the falling risk<sup>28</sup>. However, we have rea-  
2 sons to believe that the correlation is not linear throughout all grades of disability but rather resem-  
3 bles an inverse U-shaped curve. We think that the initial propensity for falls increases with higher  
4 disability only up to a certain point. Then, as patients become more cautious and use all kind of  
5 supports, it plateaus and even decreases. When patients become so disabled that they are finally  
6 bedridden, the risk approaches zero with the lack of opportunities to fall. Our values so would be  
7 located on the inclining leg close to the peak and Stolze's further down on the declining leg. Since  
8 this concept is not yet backed up by sound evidence, further studies directly comparing the risk of  
9 falling in neurological inpatients and outpatients of various grades of disability are needed to sup-  
10 port this assumption.

11 Considering recurrent falls we found that in the group of neurological patients 13.2 % fell three or  
12 more times per year, compared to 3.6% in the group of healthy controls. This is in keeping with the  
13 results of studies investigating recurrent falls, where figures of 8% for three or more falls in ran-  
14 domly selected community dwelling elderly individuals are given<sup>29</sup> and 10% for community based  
15 seniors using home care services<sup>30</sup>. In Stolze's cohort of inpatients the value of 21% for recurrent  
16 falls was higher and can probably be explained by methodological differences. Stolze's category of  
17 recurrent falls already includes patients who had fallen twice, unlike our and other studies<sup>29,30</sup> that  
18 include patients only after more than three falls.

### 33 **Risk factors contributing to falls**

34 We found out that the type of neurological disease afflicting a patient determines the potential risk  
35 factor for falls. Here, two diseases stood out: stroke patients were 6 times (89%) and Parkinson pa-  
36 tients 5 times (71%) more likely to suffer falls than healthy controls (16%). This is in keeping with  
37 previous community based studies showing a high likelihood for falls in stroke patients with a range  
38 of 51-73%<sup>10,20,31</sup> and in Parkinson's patients with a range of 38 – 87%<sup>32-38</sup>. This was followed by  
39 a group of neurological diseases with an almost 4 times higher likelihood (55-60%) of falls, consist-  
40 ing of dementia, epilepsy, other movement disorders, other vascular diseases and peripheral neu-  
41 ropathy. These diseases are also known to carry a high risk for falls, with an annual fall rate of 60-  
42 80%<sup>12,39</sup> in Alzheimer patients and 55-65%<sup>40-42</sup> in patients with peripheral neuropathy. The only  
43 study conducted on falls in elderly patients suffering from epilepsy is one on care facility residents,  
44 providing a 5-year fall incidence of 83%<sup>43</sup>. In our sample peripheral neuropathy also proved to be a  
45 risk factor for recurrent falls, but most likely significance was not reached due to the small sample  
46 size (p=0.061). Confirmative data also obtained from small cohorts revealed that repetitive falls oc-  
47 curred in 10 out of 25 (40%) neuropathy patients<sup>42</sup> and another 13 out of 20 neuropathy patients  
48 (65%) had a propensity for recurrent falls for an average of 5.8 falls per year<sup>40</sup>. New and quite  
49  
50  
51  
52  
53  
54  
55  
56  
57  
58  
59  
60

1  
2  
3  
4  
5  
6  
7  
8  
9  
10  
11  
12  
13  
14  
15  
16  
17  
18  
19  
20  
21  
22  
23  
24  
25  
26  
27  
28  
29  
30  
31  
32  
33  
34  
35  
36  
37  
38  
39  
40  
41  
42  
43  
44  
45  
46  
47  
48  
49  
50  
51  
52  
53  
54  
55  
56  
57  
58  
59  
60

astonishing was the fact that even patients suffering from neurological diseases with no direct influence on gait or balance like headache (28%) had almost twice as many falls as the average healthy control (16.1%). Also new is that in contrast to all the above cited data derived from studies on patients with only one neurological disorder, our survey provides comparative values for several neurological diseases of elderly ambulatory neurological patients for the first time, allowing a direct comparison between these disorders and a ranking according to the risk of falling.

But our findings further suggest that not only the type of neurological conditions, but also the number of neurological diseases a patient was suffering from, no matter whether they had an influence on gait or balance, correlated with the risk of falling. This came as a surprise as we assumed that only accumulations of neurological deficits relating to gait and balance would influence the risk for falls. Although there were no published studies on the influence of neurological diseases, it is known that persons with an impaired sense of balance have an disproportionately higher risk for falls when they acquire an additional new disease or condition, even if it is one that seems minor or not related to falling per se. Tinetti was able to demonstrate that the number of chronic diseases a patient was suffering from was highly predicative of a risk to fall, better even than a mobility score. She concluded that falling appears to result from an accumulated effect of multiple specific disabilities<sup>44</sup>. This would be in keeping with our other findings, that old age in combination with any neurological disease increases the risk of falling above that of healthy controls, even if it is a disease like headache. Also in accordance with this we found that a higher rate of depression, as reflected by a higher ADS-score, also increased the risk for falls. An alternative explanation for this could be that depressive thoughts are frequently combined with negative conceptions of one's own sense of balance, which was found to be a prominent risk factor for falls in our and previous other studies<sup>45</sup>. That higher age would be a predictive factor for falls in neurological patients replicates previous findings<sup>13</sup> and is easy to explain: old age is often associated with greater frailty and eventually frailty with less confidence in one's sense of balance and a higher incidence of falls<sup>45</sup>. That females are more prone to falls than males has often been stated before<sup>13</sup> and has previously been explained by a fear of falling and a loss of confidence – both independent risk factors for falls - being more prominent in women<sup>6</sup>.

## LIMITATIONS

We also faced several limitations in our study. First and most importantly, like most other surveys dealing with falls, we faced the problem that the number of falls is underreported. Elderly subjects often try to downplay problems regarding their mobility for fear of having their autonomy



1 restricted. While this is in general typically found in the healthy elderly, it might be even more  
2 prominent in patients with disabilities. But even remembering these events might pose a problem in  
3 some of the patients with central degenerative diseases and this might have been a relevant factor in  
4 our study, even though we excluded patients with severe dementia. The risk for falls in neurological  
5 patients might therefore be greater than shown in any results. Future prospective studies could  
6 minimize this problem by using patients diaries according to established guidelines for reporting  
7 falls <sup>46</sup> possibly even in combination with wearable miniaturized electronic devices apt to  
8 objectively detect and monitor falls <sup>47</sup>.

9 Secondly, the large drop out rate of 23% from neurological assessment to interview, not containing  
10 the 3,6% that had to be excluded prior to recruitment due to inability or unwillingness to participate  
11 could have lead to further underestimating the number of patients with falls. However, since these  
12 patients did not obviously differ in their baseline characteristics, we assume this problem to be  
13 minimal.  
14

15 Then, we would also like to address the issue of small sample sizes in subgroups of neurological  
16 diseases. Some of the groups like vascular diseases, movement disorders, vertebral pain and  
17 peripheral neuropathy are adequately sized, and even outnumber subjects of single disease studies  
18 like those on peripheral neuropathy <sup>40, 42</sup>. Others, particularly the dementia group with only seven  
19 patients, is, due to the exclusion of the more affected, quite small and allows only limited  
20 extrapolation. Nevertheless it is remarkable that even here the analysis of difference reached levels  
21 of significance.  
22  
23  
24

## 25 CONCLUSION

26 It can be said that we managed to show, apparently for the first time, that even among  
27 ambulatory neurological outpatients, falls are alarmingly frequent. The aetiology of falls is  
28 multi-factorial, but the connection between falls and disturbances of the sensorimotor  
29 system frequently found in neurological diseases in elderly patients is of great importance.  
30 Our findings revealed that even neurological diseases not directly connected with gait and  
31 balance carry an astonishingly high risk for falls. Neurologists should therefore be aware  
32 that their patients are at high risk for falls, as any neurological deficit increases this risk,  
33 even more so if a combination of factors is present. Of course the risk has to be evaluated  
34 individually, but patients with central diseases like stroke, Parkinson's disease, dementia and  
35  
36  
37  
38  
39  
40  
41  
42  
43  
44  
45  
46  
47  
48  
49  
50  
51  
52  
53  
54  
55  
56  
57  
58  
59  
60

1  
2 epilepsy, and for repeated falls also patients with peripheral neurological disorders, require  
3 special attention. Greater disability, higher age, female gender, depression and low  
4 confidence in the sense of balance are additional contributory factors that have to be taken  
5 into account in this process. For patients with several of these factors, targeted prevention  
6 programs should be implemented. However, although they have been shown to generally  
7 reduce falls and injuries in the community dwelling elderly<sup>48</sup>, there is but inconclusive  
8 evidence for patients following stroke<sup>49</sup> and with PD<sup>50,51</sup> and even more scanty information  
9 for patients with other neurological diseases. Therefore further larger scale multicenter  
10 neuro-geriatric surveys with larger sample sizes for neurological subgroups should be  
11 performed not only to confirm our observations but to acquire more extensive knowledge of  
12 the effectiveness of preventive measures in patient cohorts with various neurological  
13 conditions and different degrees of disability. These studies should also include more  
14 objective monitoring systems and include further potential risk factors like medication and  
15 fear of falling.  
16  
17  
18  
19  
20  
21  
22  
23  
24  
25  
26  
27  
28  
29  
30  
31

## NOTES

32 Acknowledgements: We acknowledge the study participants for their help and participation.

33  
34 Funding and Competing interests: All authors have completed the Unified Competing Interest form  
35 and declare: no support from any organisation for the submitted work; no financial relationships  
36 with any organisations that might have an interest in the submitted work in the previous three years;  
37 and no other relationships or activities that could appear to have influenced the submitted work.  
38 Thus, neither the study nor the salary of participants was funded by any third party.  
39  
40  
41  
42

43 Ethical approval: This study was approved by the Ethics Committee of the Medical University Graz  
44  
45

46 Patient consent: obtained  
47  
48

49 Contributorship: B. H.: drafting/revising the manuscript, study concept or design, analysis or  
50 interpretation of data; A. P.: analysis or interpretation of data, acquisition of data of patients and  
51 controls, study concept or design; M. G.: analysis or interpretation of data, acquisition of data of  
52 patients and controls, study concept or design; A.H. acquisition of data of patients and controls; T.  
53 G.: acquisition of data, study concept or design, G. I.: critical revision of the manuscript for  
54 important intellectual content; E. H.: statistical analysis , analysis or interpretation of data, study  
55  
56  
57  
58  
59  
60

1  
2 concept or design; G.I.: drafting/revising the manuscript, study concept or design, critical revision  
3 of the manuscript for important intellectual content; F. F.: drafting/revising the manuscript, study  
4 concept or design, critical revision of the manuscript for important intellectual content; C. N. H.:  
5 drafting/revising the manuscript, study concept or design, acquisition of data, study supervision.  
6  
7  
8  
9

10 **Data sharing:** An additional section of the questionnaire dealt with specific risk situations when  
11 using public transport, fear of falling in these situations, and general mobility issues. These issues  
12 are not directly related to the present investigation and are planned, once the analysis is completed,  
13 to be included in a separate publication.  
14  
15  
16  
17  
18  
19  
20  
21  
22  
23  
24  
25  
26  
27  
28  
29  
30  
31  
32  
33  
34  
35  
36  
37  
38  
39  
40  
41  
42  
43  
44  
45  
46  
47  
48  
49  
50  
51  
52  
53  
54  
55  
56  
57  
58  
59  
60

## REFERENCES

1. WHO. WHO global report on falls prevention in older age. Geneva, Switzerland: World Health Organization, 2007.
2. Gillespie LD. Preventing falls in older people: the story of a Cochrane review. *Cochrane database of systematic reviews* 2013;2:ED000053.
3. Luukinen H, Koski K, Hiltunen L, Kivela SL. Incidence rate of falls in an aged population in northern Finland. *Journal of clinical epidemiology* 1994;47:843-850.
4. Sattin RW, Lambert Huber DA, DeVito CA, et al. The incidence of fall injury events among the elderly in a defined population. *American journal of epidemiology* 1990;131:1028-1037.
5. Sleet DA, Moffett DB, Stevens J. CDC's research portfolio in older adult fall prevention: a review of progress, 1985-2005, and future research directions. *Journal of safety research* 2008;39:259-267.
6. Collerton J, Kingston A, Bond J, et al. The personal and health service impact of falls in 85 year olds: cross-sectional findings from the Newcastle 85+ cohort study. *PloS one* 2012;7:e33078.
7. O'Loughlin JL, Robitaille Y, Boivin JF, Suissa S. Incidence of and risk factors for falls and injurious falls among the community-dwelling elderly. *American journal of epidemiology* 1993;137:342-354.
8. Deandrea S, Lucenteforte E, Bravi F, Foschi R, La Vecchia C, Negri E. Risk factors for falls in community-dwelling older people: a systematic review and meta-analysis. *Epidemiology* 2010;21:658-668.
9. Guillochon A, Crinquette C, Gaxatte C, et al. [Neurological diseases detected in the Lille Multidisciplinary Falls Consultation]. *Revue neurologique* 2010;166:235-241.
10. Lamb SE, Ferrucci L, Volapto S, et al. Risk factors for falling in home-dwelling older women with stroke: the Women's Health and Aging Study. *Stroke; a journal of cerebral circulation* 2003;34:494-501.
11. Paul SS, Canning CG, Sherrington C, Lord SR, Close JC, Fung VS. Three simple clinical tests to accurately predict falls in people with Parkinson's disease. *Movement disorders : official journal of the Movement Disorder Society* 2013;28:655-662.
12. Horikawa E, Matsui T, Arai H, Seki T, Iwasaki K, Sasaki H. Risk of falls in Alzheimer's disease: a prospective study. *Internal medicine* 2005;44:717-721.
13. Stolze H, Klebe S, Zechlin C, Baecker C, Friege L, Deuschl G. Falls in frequent neurological diseases--prevalence, risk factors and aetiology. *J Neurol* 2004;251:79-84.
14. Mahoney FI, Barthel DW. Functional Evaluation: The Barthel Index. *Maryland state medical journal* 1965;14:61-65.
15. Fahn S ER, ed. Unified Parkinsons Disease Rating Scale. Florham Park: Macmillan Healthcare Information, 1987.
16. Hautzinger MB, Maya. Allgemeine Depressions Skala, Manual. Göttingen: Beltz Test GmbH, 1993.
17. Radloff LS. The CES-D Scale. *Applied Psychological Measurement* 1977;1:385-401.
18. Schrag A, Barone P, Brown RG, et al. Depression rating scales in Parkinson's disease: critique and recommendations. *Movement disorders : official journal of the Movement Disorder Society* 2007;22:1077-1092.
19. Peretz C, Herman T, Hausdorff JM, Giladi N. Assessing fear of falling: Can a short version of the Activities-specific Balance Confidence scale be useful? *Movement disorders : official journal of the Movement Disorder Society* 2006;21:2101-2105.
20. Forster A, Young J. Incidence and consequences of falls due to stroke: a systematic inquiry. *Bmj* 1995;311:83-86.

- 1 21. Lord SR, Sambrook PN, Gilbert C, et al. Postural stability, falls and fractures in the elderly:  
2 results from the Dubbo Osteoporosis Epidemiology Study. *The Medical journal of Australia*  
3 1994;160:684-685, 688-691.
- 4 22. Prudham D, Evans JG. Factors associated with falls in the elderly: a community study. *Age*  
5 and ageing 1981;10:141-146.
- 6 23. Campbell AJ, Borrie MJ, Spears GF, Jackson SL, Brown JS, Fitzgerald JL. Circumstances  
7 and consequences of falls experienced by a community population 70 years and over during a  
8 prospective study. *Age and ageing* 1990;19:136-141.
- 9 24. Blake AJ, Morgan K, Bendall MJ, et al. Falls by elderly people at home: prevalence and  
10 associated factors. *Age and ageing* 1988;17:365-372.
- 11 25. Tinetti ME, Speechley M, Ginter SF. Risk factors for falls among elderly persons living in  
12 the community. *The New England journal of medicine* 1988;319:1701-1707.
- 13 26. Campbell AJ, Borrie MJ, Spears GF. Risk factors for falls in a community-based  
14 prospective study of people 70 years and older. *Journal of gerontology* 1989;44:M112-117.
- 15 27. Hirtz D, Thurman DJ, Gwinn-Hardy K, Mohamed M, Chaudhuri AR, Zalutsky R. How  
16 common are the "common" neurologic disorders? *Neurology* 2007;68:326-337.
- 17 28. Schmid AA, Kapoor JR, Dallas M, Bravata DM. Association between stroke severity and  
18 fall risk among stroke patients. *Neuroepidemiology*;34:158-162.
- 19 29. Soriano TA, DeCherrie LV, Thomas DC. Falls in the community-dwelling older adult: a  
20 review for primary-care providers. *Clinical interventions in aging* 2007;2:545-554.
- 21 30. Fletcher PC, Hirdes JP. Risk factors for falling among community-based seniors using home  
22 care services. *The journals of gerontology Series A, Biological sciences and medical sciences*  
23 2002;57:M504-510.
- 24 31. Yates JS, Lai SM, Duncan PW, Studenski S. Falls in community-dwelling stroke survivors:  
25 an accumulated impairments model. *Journal of rehabilitation research and development*  
26 2002;39:385-394.
- 27 32. Balash Y, Peretz C, Leibovich G, Herman T, Hausdorff JM, Giladi N. Falls in outpatients  
28 with Parkinson's disease: frequency, impact and identifying factors. *Journal of neurology*  
29 2005;252:1310-1315.
- 30 33. Koller WC, Glatt S, Vetere-Overfield B, Hassanein R. Falls and Parkinson's disease.  
31 *Clinical neuropharmacology* 1989;12:98-105.
- 32 34. Ashburn A, Stack E, Pickering RM, Ward CD. Predicting fallers in a community-based  
33 sample of people with Parkinson's disease. *Gerontology* 2001;47:277-281.
- 34 35. Gray P, Hildebrand K. Fall risk factors in Parkinson's disease. *The Journal of neuroscience*  
35 nursing : journal of the American Association of Neuroscience Nurses 2000;32:222-228.
- 36 36. Wood BH, Bilclough JA, Bowron A, Walker RW. Incidence and prediction of falls in  
37 Parkinson's disease: a prospective multidisciplinary study. *Journal of neurology, neurosurgery, and*  
38 *psychiatry* 2002;72:721-725.
- 39 37. Pickering RM, Grimbergen YA, Rigney U, et al. A meta-analysis of six prospective studies  
40 of falling in Parkinson's disease. *Movement disorders : official journal of the Movement Disorder*  
41 *Society* 2007;22:1892-1900.
- 42 38. Hely MA, Reid WG, Adena MA, Halliday GM, Morris JG. The Sydney multicenter study of  
43 Parkinson's disease: the inevitability of dementia at 20 years. *Movement disorders : official journal*  
44 *of the Movement Disorder Society* 2008;23:837-844.
- 45 39. Ryan JJ, McCloy C, Rundquist P, Srinivasan V, Laird R. Fall risk assessment among older  
46 adults with mild Alzheimer disease. *J Geriatr Phys Ther*;34:19-27.
- 47 40. DeMott TK, Richardson JK, Thies SB, Ashton-Miller JA. Falls and gait characteristics  
48 among older persons with peripheral neuropathy. *American journal of physical medicine &*  
49 *rehabilitation / Association of Academic Physiatrists* 2007;86:125-132.
- 50 41. Richardson JK, Ching C, Hurvitz EA. The relationship between electromyographically  
51 documented peripheral neuropathy and falls. *Journal of the American Geriatrics Society*  
52 1992;40:1008-1012.

- 1  
2  
3  
4  
5  
6  
7  
8  
9  
10  
11  
12  
13  
14  
15  
16  
17  
18  
19  
20  
21  
22  
23  
24  
25  
26  
27  
28  
29  
30  
31  
32  
33  
34  
35  
36  
37  
38  
39  
40  
41  
42  
43  
44  
45  
46  
47  
48  
49  
50  
51  
52  
53  
54  
55  
56  
57  
58  
59  
60
42. Richardson JK, Hurvitz EA. Peripheral neuropathy: a true risk factor for falls. *The journals of gerontology Series A, Biological sciences and medical sciences* 1995;50:M211-215.
43. Flierl-Hecht A, Pfafflin M, May TW, Kohlschutter S, Hensel B, Stefan H. [Is epilepsy in the elderly overlooked? An investigation in a home for the aged]. *Der Nervenarzt* 2003;74:691-698.
44. Tinetti ME, Williams TF, Mayewski R. Fall risk index for elderly patients based on number of chronic disabilities. *The American journal of medicine* 1986;80:429-434.
45. Kose N, Cuvalci S, Ekici G, Otman AS, Karakaya MG. The risk factors of fall and their correlation with balance, depression, cognitive impairment and mobility skills in elderly nursing home residents. *Saudi medical journal* 2005;26:978-981.
46. Lamb SE, Jorstad-Stein EC, Hauer K, Becker C, Prevention of Falls Network E, Outcomes Consensus G. Development of a common outcome data set for fall injury prevention trials: the Prevention of Falls Network Europe consensus. *Journal of the American Geriatrics Society* 2005;53:1618-1622.
47. Howcroft J, Kofman J, Lemaire ED. Review of fall risk assessment in geriatric populations using inertial sensors. *Journal of neuroengineering and rehabilitation* 2013;10:91.
48. Oliver D, Connelly JB, Victor CR, et al. Strategies to prevent falls and fractures in hospitals and care homes and effect of cognitive impairment: systematic review and meta-analyses. *Bmj* 2007;334:82.
49. Verheyden GS, Weerdesteyn V, Pickering RM, et al. Interventions for preventing falls in people after stroke. *Cochrane database of systematic reviews* 2013;5:CD008728.
50. Goodwin VA, Richards SH, Henley W, Ewings P, Taylor AH, Campbell JL. An exercise intervention to prevent falls in people with Parkinson's disease: a pragmatic randomised controlled trial. *Journal of neurology, neurosurgery, and psychiatry* 2011;82:1232-1238.
51. Li F, Harmer P, Fitzgerald K, et al. Tai chi and postural stability in patients with Parkinson's disease. *The New England journal of medicine* 2012;366:511-519.

## TABLES AND FIGURES

**Table 1: Neurological patients and healthy controls: General demographics and fall frequency**

|                                   | Total               |                    |         | Matched pairs       |                    |         |
|-----------------------------------|---------------------|--------------------|---------|---------------------|--------------------|---------|
|                                   | Patients<br>(n=228) | Healthy<br>(n=193) | p-value | Patients<br>(n=171) | Healthy<br>(n=171) | p-value |
| <b>Total</b>                      |                     |                    |         |                     |                    |         |
| Age                               | 74.5±7.8            | 71.4±6.8           | 0.000   | 72.2±7.0            | 72.0±6.9           | 0.839   |
| Gender (f in %)                   | 61%                 | 63%                | 0.572   | 59%                 | 59%                | 1.000   |
| Region (Residential Index: mean)  | 2.53                | 2.21               | 0.021   | 2.66                | 2.22               | 0.004   |
| Disability (Bartelindex: mean)    | 98.20               | n.d.               |         | 98.24               | n.d.               |         |
| Balance (ABC-score: mean)         | 73.19               | n.d.               |         | 83.39               | n.d.               |         |
| Depression (ADS-K-score: mean)    | 7.2                 | n.d.               |         | 6.9                 | n.d.               |         |
|                                   |                     |                    |         |                     |                    |         |
| <b>Fallers</b>                    |                     |                    |         |                     |                    |         |
| Falls (n (%))                     | 46.5%               | 16.1%              | 0.000   | 42.1%               | 16.9%              | 0.000   |
| Multiple Falls (>2 falls) (n (%)) | 28.3%               | 22.6%              | 0.528   | 26.4%               | 24.1%              | 0.815   |
| Fall frequency Index (in fallers) | 1.42±0.8            | 1.23±0.4           | 0.078   | 1.44±0.9            | 1.24±0.4           | 0.14    |

Percentage of multifallers in various Neurological Diseases according to FFI categories

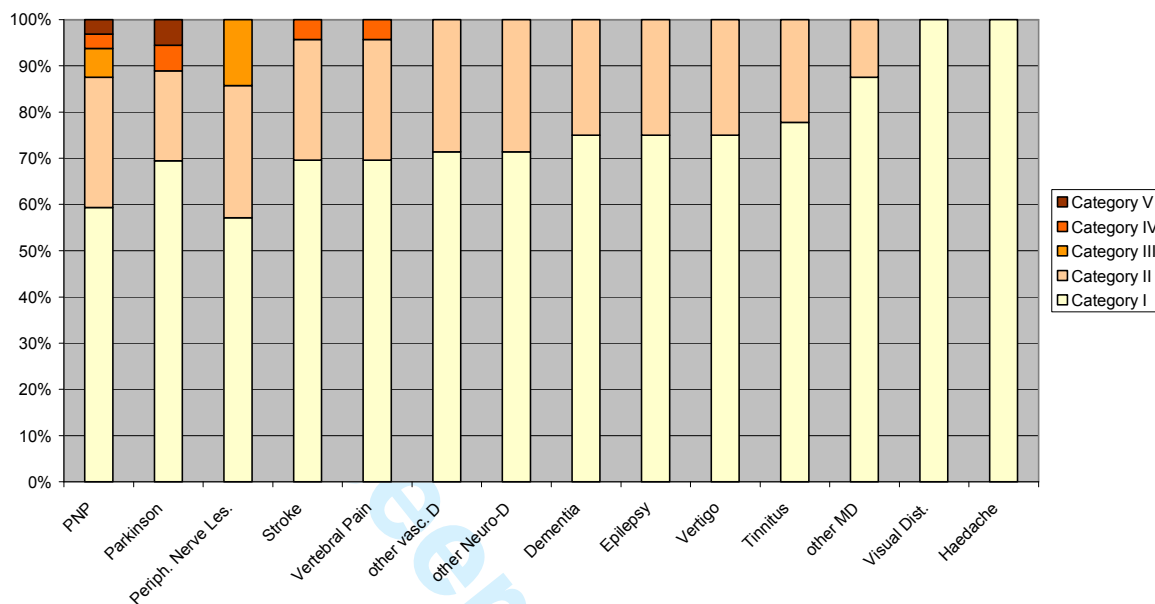

| Cate-gories  | PNP (n)   | PD (n)    | PNL (n)   | Strok e (n) | Vert P (n) | other vasc (n) | Other n. D. (n) | Dem (n)  | Epi (n)  | Vertig (n) | Tinni-tus (n) | other MD (n) | Visual Dist (n) | Haed-ache (n) |
|--------------|-----------|-----------|-----------|-------------|------------|----------------|-----------------|----------|----------|------------|---------------|--------------|-----------------|---------------|
| V            | 1         | 2         | 0         | 0           | 0          | 0              | 0               | 0        | 0        | 0          | 0             | 0            | 0               | 0             |
| IV           | 1         | 2         | 0         | 1           | 1          | 0              | 0               | 0        | 0        | 0          | 0             | 0            | 0               | 0             |
| III          | 2         | 0         | 1         | 0           | 0          | 0              | 0               | 0        | 0        | 0          | 0             | 0            | 0               | 0             |
| II           | 9         | 7         | 2         | 6           | 6          | 4              | 4               | 1        | 1        | 3          | 2             | 1            | 0               | 0             |
| I            | 19        | 25        | 4         | 16          | 16         | 10             | 10              | 3        | 3        | 9          | 7             | 7            | 4               | 4             |
| 0            | 27        | 11        | 11        | 3           | 15         | 11             | 20              | 3        | 3        | 18         | 21            | 6            | 6               | 10            |
| <b>Total</b> | <b>59</b> | <b>47</b> | <b>18</b> | <b>26</b>   | <b>48</b>  | <b>25</b>      | <b>34</b>       | <b>7</b> | <b>7</b> | <b>30</b>  | <b>30</b>     | <b>14</b>    | <b>10</b>       | <b>14</b>     |

**Fig.1** Frequency of falls in neurological patients according to their neurological disorder. Fall Frequency Index (FFI) Category I = 1-2 falls in the last twelve months, Category II = 3-5, Category III = 6-10, Category IV = 11-20, and Category V = more than 20.

**Abbreviations:** PNP = peripheral neuropathy, Periph. nerve les. = peripheral nerve lesion, other MD = other movement disorders, other vasc. d. = other vascular disease, Visual.Dist. = visual disturbances



## One year fall incidence in common neurological disorders

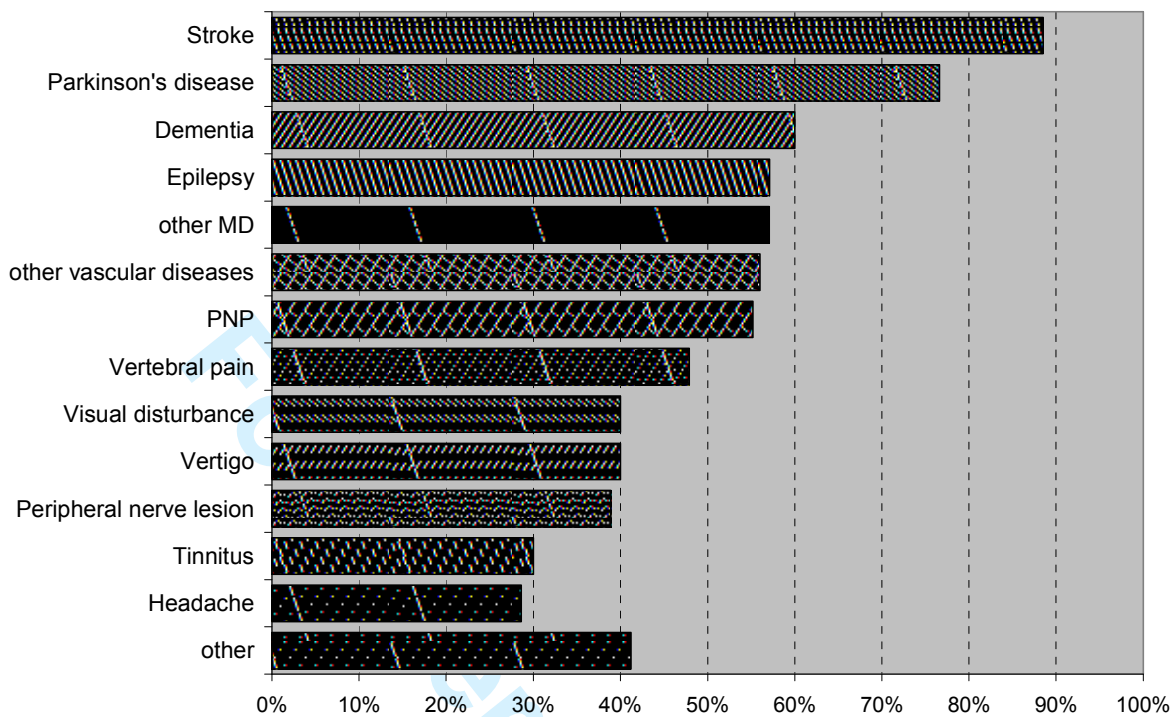

**Fig.2** Difference in frequency of having at least one fall within the twelve-month period for patients suffering from the 13 most commonly encountered neurological disorders.

**Table 2: Neurological Patient groups: General demographics and fall risk**

| Diagnosis       | Age      | Bartel | Total<br>(n) | Falls<br>(n (%)) | Multiple<br>Falls*<br>(n (%)) | Fall fre-<br>quency**<br>(in fallers) | Risk of falling |              |         |
|-----------------|----------|--------|--------------|------------------|-------------------------------|---------------------------------------|-----------------|--------------|---------|
|                 |          |        |              |                  |                               |                                       | OR              | CI           | p-value |
| Stroke          | 82,7±2,3 | 99,76  | 26           | 23 (89%)         | 7 (30%)                       | 1,39±0,72                             | 40,1            | (11,3-141,7) | 0.000   |
| Parkinson D     | 74,8±8,1 | 99,79  | 47           | 36 (77%)         | 11 (31%)                      | 1,58±1,13                             | 17,1            | (7,9-37,2)   | 0.000   |
| Dementia        | 77,5±9,2 | 99,77  | 7            | 3 (60%)          | 1 (33%)                       | 1,33±0,58                             | 7,8             | (1,3-48,9)   | 0.01    |
| Epilepsy        | 71,0±8,2 | 99,78  | 7            | 4 (57%)          | 1 (25%)                       | 1,25±0,5                              | 7,0             | (1,5-32,7)   | 0.005   |
| other MD        | 74,3±7,9 | 100    | 14           | 8 (57%)          | 1 (13%)                       | 1,23±0,82                             | 7,0             | (2,3-21,5)   | 0.000   |
| other vasc. D   | 74,8±8,1 | 99,79  | 25           | 14 (56%)         | 4 (29%)                       | 1,29±0,47                             | 6,7             | (2,8-16,0)   | 0.000   |
| PNP             | 71,0±8,1 | 99,78  | 58           | 32 (55%)         | 13 (43%)                      | 1,63±0,98                             | 6,4             | (3,4-12,3)   | 0.000   |
| Vertebral Pain  | 76,8±9,1 | 99,75  | 48           | 23 (48%)         | 7 (30%)                       | 1,39±0,72                             | 4,8             | (2,4-9,5)    | 0.000   |
| Visual Disturb. | 69,5±0,7 | 99,77  | 10           | 4 (40%)          | 0 (0%)                        | 1±0                                   | 3,5             | (0,9-13,1)   | 0.051   |
| Vertigo         | 72,0±8,1 | 99,75  | 30           | 12 (40%)         | 3 (25%)                       | 1,25±0,45                             | 3,5             | (1,5-8,0)    | 0.002   |
| P. Nerve Les.   | 66,0±8,1 | 99,79  | 18           | 7 (39%)          | 3 (43%)                       | 1,57±0,79                             | 3,3             | (1,2-9,2)    | 0.016   |
| Tinnitus        | 74,3±8,4 | 99,76  | 30           | 9 (30%)          | 2 (22%)                       | 1,22±0,44                             | 2,2             | (0,9 - 5,3)  | 0.064   |
| Headache        | 74,8±8,1 | 99,79  | 14           | 4 (29%)          | 0 (0%)                        | 1,0±0.0                               | 2,1             | (0,6-7,1)    | 0,228   |
| Other           | 79,4±7,1 | 99,74  | 34           | 14 (41%)         | 4 (29%)                       | 1,29±0,47                             | 3,7             | (1,7 - 8,0)  | 0.001   |

\*) Multiple falls were defined as more than two falls per year (i.e. a fall frequency index  $\geq 2$ )

\*\*) Fall frequency index: Category I = 1-2 falls in the last twelve months, Category II = 3-5 falls in the last twelve months, Category III = 6-10 falls in the last twelve months, Category IV = 11-20 falls in the last twelve months, and Category V = more than 20 falls in the last twelve months.

a) Balance confidence and occurrence of falls

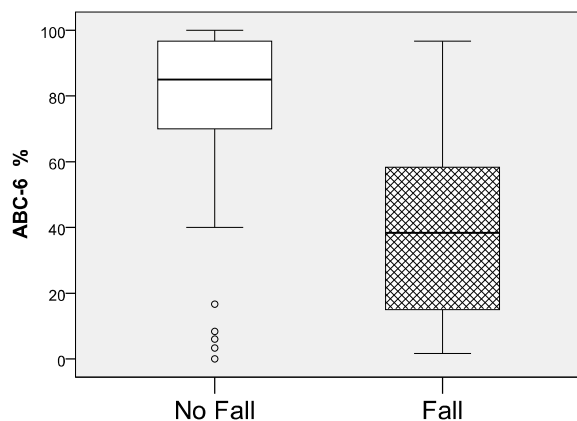

b) Neurological comorbidities and falls

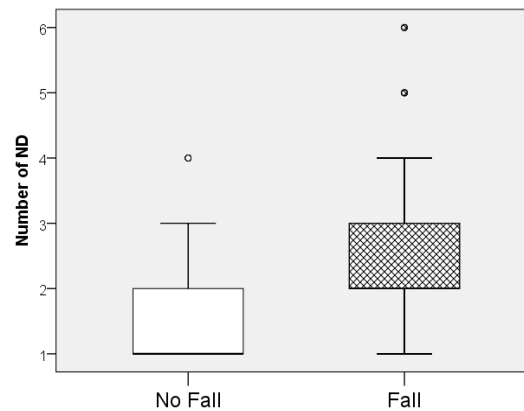

**Fig.3a,b** Differences in ABC-6 scores (3a) and number of neurological diseases (ND) (3b) of neurological patients with and without falls indicate that fallers as compared to non-fallers have lower confidence in their balance and a higher number of concomitant neurological diseases.

(ABC-6% meaning percentage scores of the 6-item version of the Activities-Specific Balance Confidence scale, number of ND meaning number of neurological diseases a patient is afflicted with)

## STROBE checklist - observational studies

|                           | Item No | Recommendation                                                                                                                                                                                                                                                                                                                                                                                                                                                            |                                            |
|---------------------------|---------|---------------------------------------------------------------------------------------------------------------------------------------------------------------------------------------------------------------------------------------------------------------------------------------------------------------------------------------------------------------------------------------------------------------------------------------------------------------------------|--------------------------------------------|
| <b>Title and abstract</b> |         |                                                                                                                                                                                                                                                                                                                                                                                                                                                                           |                                            |
|                           | 1       | (a) Indicate the study's design with a commonly used term in the title or the abstract<br>(b) Provide in the abstract an informative and balanced summary of what was done and what was found                                                                                                                                                                                                                                                                             | p1, p2 I12<br>p2                           |
| <b>Introduction</b>       |         |                                                                                                                                                                                                                                                                                                                                                                                                                                                                           |                                            |
| Background/rationale      | 2       | Explain the scientific background and rationale for the investigation being reported                                                                                                                                                                                                                                                                                                                                                                                      | P4-5                                       |
| Objectives                | 3       | State specific objectives, including any prespecified hypotheses                                                                                                                                                                                                                                                                                                                                                                                                          | P5 I12-20                                  |
| <b>Methods</b>            |         |                                                                                                                                                                                                                                                                                                                                                                                                                                                                           |                                            |
| Study design              | 4       | Present key elements of study design early in the paper                                                                                                                                                                                                                                                                                                                                                                                                                   | P5 I40 – p6 I27                            |
| Setting                   | 5       | Describe the setting, locations, and relevant dates, including periods of recruitment, exposure, follow-up, and data collection                                                                                                                                                                                                                                                                                                                                           | P5 I32-37, p5 I42-47, p6 I17-21, p6 I22-26 |
| Participants              | 6       | (a) <i>Cohort study</i> ? Give the eligibility criteria, and the sources and methods of selection of participants. Describe methods of follow-up<br><i>Case-control study</i> ? Give the eligibility criteria, and the sources and methods of case ascertainment and control selection. Give the rationale for the choice of cases and controls<br><i>Cross sectional study</i> ? Give the eligibility criteria, and the sources and methods of selection of participants | P5 I42- p6 I15                             |
|                           |         | (b) <i>Cohort study</i> ? For matched studies, give matching criteria and number of exposed and unexposed<br><i>Case-control study</i> ? For matched studies, give matching criteria and the number of controls per case                                                                                                                                                                                                                                                  | P7 I4 I48                                  |
| Variables                 | 7       | Clearly define all outcomes, exposures, predictors, potential confounders, and effect modifiers. Give diagnostic criteria, if applicable                                                                                                                                                                                                                                                                                                                                  | P6 I37-p7 I16                              |
| Data sources/measurement  | 8*      | For each variable of interest, give sources of data and details of methods of assessment (measurement). Describe comparability of assessment methods if there is more than one group                                                                                                                                                                                                                                                                                      | P6 I37-p7 I16                              |
| Bias                      | 9       | Describe any efforts to address potential sources of bias                                                                                                                                                                                                                                                                                                                                                                                                                 | P13 I18-21, p7 I40-48                      |
| Study size                | 10      | Explain how the study size was arrived at                                                                                                                                                                                                                                                                                                                                                                                                                                 | P5 I46-47                                  |
| Quantitative variables    | 11      | Explain how quantitative variables were handled in the analyses. If applicable, describe which groupings were chosen and why                                                                                                                                                                                                                                                                                                                                              | P7 I28-30                                  |
| Statistical methods       | 12      | (a) Describe all statistical methods, including those used to control for confounding                                                                                                                                                                                                                                                                                                                                                                                     | P7 I31-53                                  |
|                           |         | (b) Describe any methods used to examine subgroups and interactions                                                                                                                                                                                                                                                                                                                                                                                                       | P7 I37-39                                  |
|                           |         | (c) Explain how missing data were addressed                                                                                                                                                                                                                                                                                                                                                                                                                               | P7 I48-49                                  |
|                           |         | (d) <i>Cohort study</i> ? If applicable, explain how loss to follow-up was addressed<br><i>Case-control study</i> ? If applicable, explain how matching of cases and controls was addressed<br><i>Cross sectional study</i> ? If applicable, describe analytical methods taking account of sampling strategy                                                                                                                                                              | P13 I15-22                                 |
|                           |         | (e) Describe any sensitivity analyses                                                                                                                                                                                                                                                                                                                                                                                                                                     | P7 I35                                     |
| <b>Results</b>            |         |                                                                                                                                                                                                                                                                                                                                                                                                                                                                           |                                            |
| Participants              | 13*     | (a) Report numbers of individuals at each stage of study? eg numbers potentially eligible, examined for eligibility, confirmed eligible, included in the study, completing follow-up, and analysed                                                                                                                                                                                                                                                                        | P8 I4-29                                   |
|                           |         | (b) Give reasons for non-participation at each stage                                                                                                                                                                                                                                                                                                                                                                                                                      | √p8 I4-29                                  |
|                           |         | (c) Consider use of a flow diagram                                                                                                                                                                                                                                                                                                                                                                                                                                        | -                                          |
| Descriptive data          | 14*     | (a) Give characteristics of study participants (eg demographic, clinical, social) and information on exposures and potential confounders                                                                                                                                                                                                                                                                                                                                  | P18                                        |
|                           |         | (b) Indicate number of participants with missing data for each variable of interest                                                                                                                                                                                                                                                                                                                                                                                       | P8 I36-p9 I55                              |
|                           |         | (c) <i>Cohort study</i> ? Summarise follow-up time (eg average and total amount)                                                                                                                                                                                                                                                                                                                                                                                          | P8 I38                                     |
| Outcome data              | 15*     | <i>Cohort study</i> ? Report numbers of outcome events or summary measures over time                                                                                                                                                                                                                                                                                                                                                                                      | n.a.                                       |
|                           |         | <i>Case-control study</i> ? Report numbers in each exposure category, or summary measures of exposure                                                                                                                                                                                                                                                                                                                                                                     | P8 I35 – p9 I55                            |
|                           |         | <i>Cross sectional study</i> ? Report numbers of outcome events or summary measures                                                                                                                                                                                                                                                                                                                                                                                       | n.a.                                       |
| Main results              | 16      | (a) Report the numbers of individuals at each stage of the study? eg numbers                                                                                                                                                                                                                                                                                                                                                                                              | P8 I3-29                                   |

|                          | Item No | Recommendation                                                                                                                                                             |                   |
|--------------------------|---------|----------------------------------------------------------------------------------------------------------------------------------------------------------------------------|-------------------|
|                          |         | potentially eligible, examined for eligibility, confirmed eligible, included in the study, completing follow-up, and analysed                                              |                   |
|                          |         | (b) Give reasons for non-participation at each stage                                                                                                                       | P8 I3-29          |
|                          |         | (c) Consider use of a flow diagram                                                                                                                                         | -                 |
| Other analyses           | 17      | Report other analyses done?eg analyses of subgroups and interactions, and sensitivity analyses                                                                             | P9 I23-55         |
| <b>Discussion</b>        |         |                                                                                                                                                                            |                   |
| Key results              | 18      | Summarise key results with reference to study objectives                                                                                                                   | P3 I25-37         |
| Limitations              | 19      | Discuss limitations of the study, taking into account sources of potential bias or imprecision. Discuss both direction and magnitude of any potential bias                 | P12 I52 – p13 I36 |
| Interpretation           | 20      | Give a cautious overall interpretation of results considering objectives, limitations, multiplicity of analyses, results from similar studies, and other relevant evidence | P13 I43- p14 I24  |
| Generalisability         | 21      | Discuss the generalisability (external validity) of the study results                                                                                                      | P3 I50-53         |
| <b>Other information</b> |         |                                                                                                                                                                            |                   |
| Funding                  | 22      | Give the source of funding and the role of the funders for the present study and, if applicable, for the original study on which the present article is based              | P14 I35-41        |

1  
2  
3  
4  
5  
6  
7  
8  
9  
10  
11  
12  
13  
14  
15  
16  
17  
18  
19  
20  
21  
22  
23  
24  
25  
26  
27  
28  
29  
30  
31  
32  
33  
34  
35  
36  
37  
38  
39  
40  
41  
42  
43  
44  
45  
46  
47  
48  
49  
50  
51  
52  
53  
54  
55  
56  
57  
58  
59  
60

**The impact of ~~various~~ neurological disorders on the risk for falls in the  
community dwelling elderly: a case controlled study**

Homann, Barbara<sup>1</sup>; Plaschg, Annemarie<sup>1</sup>; Grundner, Marion<sup>1</sup>; Griedl, Theresa<sup>1</sup>; Ivanic, Gerd<sup>2</sup>;  
Hofer, Edith<sup>1</sup>; Fazekas, Franz<sup>1</sup>; Homann, Carl Nikolaus<sup>1</sup>

<sup>1</sup>) Medical University Graz, Dept of Neurology, <sup>2</sup>) Paracelsus Medical University Salzburg, Dep. of  
Orthopaedic Surgery

## ABSTRACT

**Objectives:** Owing to a lack of data, our aim was to evaluate and compare the impact of various common neurological diseases on the risk for falls in independent community dwelling senior citizens.

**Design:** Prospective case controlled study

**Setting:** General Hospital

**Participants:** Out of 298 consecutive patients and 214 controls enrolled, 228 patients (aged 74.5±7.8; 61% women) and 193 controls (aged 71.4±6.8; 63% women) were included. Exclusion criteria for patients were severe disability, disabling general condition, or severe cognitive impairment, for controls any history of neurological disorders or disabling medical conditions, and for both age below 60 years. A matching process led to 171 age- and gender-matched pairs of neurological patients and healthy controls.

**Main outcome measures:** One-year incidence of falls based on patients' 12 month recall; motor and non- motor function tests to detect additional risk factors.

**Results:** 46% of patients and 16% of controls fell at least once a year. Patients with stroke (89%), Parkinson's disease (77%), dementia (60%) or epilepsy (57%) had a particularly high proportion of fallers/fall frequencies, but even subgroups of patients with the least fall-associated neurological diseases like tinnitus (30%) and headache (28%) had a higher proportion of fallers incidence of falls than the control groups. Neuropathies, peripheral nerve lesions and Parkinson's disease were predisposing to recurrent falls. A higher number of neurological comorbidities (p<0.001), lower Barthel Index values (p<0.001), lower Activities-Specific Balance Confidence scores (, p<0.001), and higher Center of Epidemiological Studies Depression scores (p<0.001) as well as higher age (p<0.001) and female gender (p=0.003) proved to further increase the risk of falls.

**Conclusions:** Physicians should be aware that all elderly neurological patients seen in outpatient settings are potentially at high risk for falls; they should query them routinely about previous falls and fall risks and advise them on preventive strategies.

#### Article summary

##### Article focus

- Previous studies have shown that falls in the elderly are common and substantial amount of limited data on single neurological conditions like stroke and Parkinson's disease in

Formatted: Font: (Default) Liberation Serif, 12 pt

Formatted: Font: (Default) Liberation Serif, 12 pt

Formatted

1  
2  
3  
4  
5  
6 | ~~pairments~~ suggest that neurological impairments ~~these conditions~~ further increase the risk  
7 for falls.

- 8  
9 • However, little is known on the influence of a broad range of neurological diseases and how  
10 they differ among each other. ~~No data is available on independent community dwelling senior~~  
11 ~~citizens.~~  
12  
13 • The aim of this study is to provide comparative data on the risk of falling in ambulatory el-  
14 derly subjects afflicted with various common neurological diseases and to evaluate the role  
15 of additional risk factors.  
16  
17

### 18 19 *Key messages*

- 20 • The results of our study suggest that all elderly neurological patients even when still ambu-  
21 latory carry a heightened risk for falls.  
22  
23 • The impact differs according to disease but those with impairments of the sensorimotor sys-  
24 tem are particularly endangered. However our findings investigating yet unstudied popu-  
25 lations, eg, such as headache revealed that even neurological disorders not directly connect-  
26 ed with gait and balance carry an astonishingly unexpected high risk for falls and that there  
27 is a cumulative effect of more than one neurological condition on the risk of falls.  
28  
29  
30

Formatted: Font: (Default) Liberation Serif, 12 pt

### 31 32 *Strengths and limitations of this study*

- 33 • Strengths of this study include the prospective study design, the number of standardised out-  
34 come measures, the standardised assessment of neurological patients and the thorough ex-  
35 amination and inclusion of healthy controls.  
36  
37 • The following limitations should be considered: although the design is prospective, the  
38 falls history is retrospective, based on patients' recall over 12 months, therefore the infor-  
39 mation on falls was self reported and underreporting of cases is possible. Small sample sizes  
40 in some of the subgroups of neurological diseases. Participants were mostly of Caucasian  
41 origin and there was a high drop-out rate, which may limit the generalisability of the results  
42 to other populations.  
43  
44  
45  
46  
47  
48  
49  
50  
51  
52  
53  
54  
55  
56  
57  
58  
59  
60



## INTRODUCTION

Due to budget cuts and austerity measures the costs of accidents and falls have come into the spotlight of health policy makers. The World Health Organisation too has recently made fall prevention in the elderly one of its top priorities. The WHO Global Report on Falls Prevention in Older Age states that due to the high percentage of elderly people worldwide the economic and societal burden of falls will increase by epidemic proportions in all parts of the world over the next few decades, unless concerted action is taken in a systematic and proactive fashion by policy makers, researchers and practitioners<sup>1</sup>.

It is known that falls in the elderly are common and have a great impact on life and wellbeing. Studies have shown that around 30% of subjects of 65 years plus had a fall during the last 12 months<sup>2-3</sup> with 10% sustaining severe injuries<sup>3</sup>. Injuries are the fifth most frequent cause of death in the elderly and up to 70% of these injuries were caused by falls<sup>4</sup>. Elderly persons surviving a fall experience significant morbidity: as many as one-third require assistance in their activities of daily living for as long as 6 months<sup>5</sup>. Lasting disabilities are also common as many do not reach pre-fall physical functional states, resulting in increased dependency and (in up to 50%) a transfer to a care facility<sup>4</sup>. Associated as they are with considerable mortality as well as psychological and physical morbidity, these falls lead to increased dependence upon social support and health care services, with high economic impact on the social and health care system<sup>6</sup>. But there is substantial evidence that falls can be prevented when subjects at risk are identified and enrolled in targeted prevention programs<sup>7</sup>.

Several risk factors like sociodemographic variables, physical activity, alcohol consumption, acute and chronic health problems, dizziness, mobility, and medications have been documented repeatedly<sup>7</sup>. Neurological impairments in the elderly are also thought to increase the risk for falls, though evidence for this is mostly derived indirectly from investigations into the causes of falls in the elderly<sup>8</sup>. These studies show that patients admitted to hospitals due to falls frequently also suffer from neurological disorders. Data derived from a multidisciplinary fall consultation survey suggest that in two out of three patients, potentially fall inducing neurological disorders were present, most of them (85%) previously undiagnosed<sup>9</sup>.

There is, however, substantially less known about the risk for falls in patients afflicted with various common neurological diseases. While there is already a substantial amount known about increased risk of falls in the ~~Several studies were conducted on the risk of falls in patients with a single neurological disease like~~ stroke<sup>10</sup>, Parkinson's disease<sup>11</sup> or dementia<sup>12</sup> population, but to our knowledge there is only one comparative study investigating falls in patients with of a broad range of different neurological diseases. This study by Stolze, however, was conducted on patients

1  
2  
3  
4  
5  
6 with neurological diseases severe enough to require hospital admission<sup>13</sup>. To date little is known  
7 about the risk of falling in independent, community dwelling senior citizens afflicted with  
8 neurological diseases treatable in outpatient facilities. Studies targeting this issue so far either did  
9 not use a control group or, if they did, the absence of neurological signs and symptoms in this  
10 cohort was not guaranteed.

11  
12  
13 Because falls in community dwelling elderly patients are assumed to be both prevalent and  
14 preventable, neurologists in outpatient settings need a sound base to identify patients with the  
15 highest risk, to reduce not only the number of falls and the suffering they entail, but also overall  
16 health care costs. Our study thus aimed to investigate the risk of falls in elderly patients with  
17 various neurological diseases that are commonly encountered in outpatient facilities. We  
18 hypothesized that even in community dwelling elderly patients, the impact one or more  
19 neurological diseases on top of an already increased propensity for falls is substantial; that patients  
20 with certain diseases like stroke or Parkinson's disease are particularly at risk; and that affliction  
21 with more than one of these high risk diseases increases the risk even further.  
22  
23  
24  
25  
26  
27  
28  
29

## 30 PARTICIPANTS AND METHODS

### 31 Epidemiological and environmental basesSetting

32  
33  
34  
35 Data were collected at the general outpatient department of the Department of Neurology of the  
36 University Hospital in Graz, Austria. ~~The Department of Neurology provides health care for about~~  
37 ~~500,000 people in Styria and southern Burgenland, though mostly to inhabitants of Graz and the~~  
38 ~~surrounding area. The department focuses its basic and clinical research on cerebrovascular~~  
39 ~~disorders, dementia, epilepsy, movement disorders and multiple sclerosis. At this teaching hospital,~~  
40 ~~out of a total of 1565 beds, there are 92 neurological beds, including 8 in intensive care and 6 in the~~  
41 ~~stroke unit. Out of approximately 22,600 neurological outpatient contacts recorded each year 4,600~~  
42 ~~are from the general outpatient department, the rest in equal proportions from specialized outpatient~~  
43 ~~clinics and the neurological emergency room. Two out of five neurologists are in rotation on duty~~  
44 ~~at the Neurology Outpatient Clinic and they are attending to the patients on a random basis. As~~  
45 visits to the outpatient department do not require specialist referrals, the disease spectrum largely  
46 resembles that seen by community based neurologists.  
47  
48  
49  
50  
51  
52

### 53 Selection of participants and baseline examination

1  
2  
3  
4  
5  
6 Physically independent community dwelling patients treated in our general neurological outpatient  
7 clinic aged 60 years and over were included in the study. Patients were all seen consecutively by  
8 one and the same consultant (CNH) in the period from July 2007 to May 2008, what also explains  
9 the study size. Severely disabled patients who were no longer able to walk unaided, or were in  
10 poor general condition, be it for reasons of neurological or other medical disease, were excluded  
11 from the study. or Cognitively impairment to an extent that an interview would no longer yield  
12 reliable results (MMSE<12), was also a cause for exclusion. were excluded from the study. All  
13 neurological patients included underwent a full neurological workup with an extensive history to  
14 detect signs of past and present neurological disorders. For the sake of uniformity, both the workup  
15 and history were structured and followed the study protocol.

16  
17 As healthy controls, individuals from the general public out of the same catchment area as cases  
18 were enrolled. They were recruited among friends and acquaintances of the author and his co-  
19 workers who were aged 60+ and without any history of neurological disorders or other disabling  
20 medical conditions like heart failure, chronic obstructive pulmonary disease or rheumatoid arthritis  
21 severe enough to cause limitation of ordinary physical activity. Examination and history were as per  
22 study protocol, whereby special emphasis was placed on identifying symptoms and signs of  
23 Parkinson's disease, peripheral neuropathy, stroke or epilepsy, as well as minor sensory-motor  
24 deficits and gait or balance impairments. Controls with even subtle neurological pathologies were  
25 excluded. Although not routinely screened for cognitive deficits, obvious signs of or a known  
26 diagnosis of dementia or even of mild cognitive impairment was a reason for exclusion.

27  
28 A telephone follow-up was scheduled 12 months after the baseline outpatient visit; it was carried  
29 out by one of two examiners (AP, MG) following a predefined format and only subjects who had  
30 given oral verbal informed consent beforehand at the timestart of the telephone contact were  
31 interviewed.

32  
33 The first section of the interview questionnaire covered demographic data like age and place of  
34 residence. The residence category had 5 subsections on size and traffic infrastructure, with group 1  
35 being the state capital and group 5 a small town in the periphery. Next were specific questions on  
36 fall frequency, physical disability, depression and confidence in one's own sense of balance. The  
37 final section dealt with risk situations (like when using public transport) and general mobility  
38 issues, whereby the latter are not included in this publication.

39  
40 The survey, including all details concerning the selection process, was approved by the Ethics  
41 Committee of the Medical University Graz.

### 52 53 **Frequency of falls**

54 In the main section of the questionnaire patients and healthy controls were asked whether they had

1  
2  
3  
4  
5  
6 had a fall during the past 12 months and, if yes, how many times they had fallen. The yearly fall  
7 incidence was graded according to the fall frequency index into 5 categories. Category one means  
8 1-2 falls, category two 3-5, three 6-10, four 11-20, and five more than 20 falls.

#### 11 **Analysis of Disability**

12 The Barthel Index <sup>14</sup>, a disability scale with scores from 0 (completely dependent) to 100  
13 (completely independent) was used to evaluate the functional status of all neurological patients.

14 Parkinson patients were also rated according to the ~~modified Hoehn and Yahr Scale~~, the Schwab  
15 and England Scale and Part II of the Unified Parkinson's Disease Rating Scale (UPDRS) <sup>15</sup>.

#### 19 **Analysis of Depression**

20 To determine the grade of depression, the Allgemeine Depressionsskala Kurzform (ADS-K) <sup>16</sup>, the  
21 German short form of the Center of Epidemiological Studies Depression Scale (CES-D) <sup>17</sup> was  
22 used. It is known to be particularly well suited for the use in the elderly and in patients with certain  
23 neurological disabilities <sup>18</sup>.

#### 28 **Analysis of the Confidence in one's own Sense of Balance Confidence**

29 We also rated the patients' confidence in their own sense of balance with the Activities-Specific  
30 Balance Confidence Scale (ABC -6 scale) <sup>19</sup>. Participants judged their confidence in performing  
31 specific activities without loss of balance or being unsteady~~not to fall during specific activities~~ on a  
32 scale ranging from 0% (no confidence at all) to 100% (completely confident). The total score was  
33 then computed as an average of the subscores.

#### 38 **Statistical analysis**

39 The primary outcomes was falls, based on participant recall over the prior 12 months. Falls were  
40 defined according to the WHO definition <sup>1</sup> as an event which results in a person coming to rest  
41 inadvertently on the ground or floor or other lower level irrespective of cause, thus including e.g.  
42 falls from epileptic seizures. The one-year incidence of falls was calculated for both healthy elderly  
43 individuals and the whole sample of neurological patients. Further calculations were done for  
44 subsamples of 13 neurological disorders with the highest prevalence ( $n \geq 7$ ). The diagnoses were  
45 based on the ICD-10 system for classification of diseases. The means and standard deviations were  
46 calculated for numerical values like the rating scale scores. For the identification of fall related risk  
47 factors, correlations (Kendall's  $\tau$ -B), and for the individual neurological disorders, ~~risk~~ odds ratios  
48 were computed ( $\alpha$ -level of significance  $p < 0.05$ ). Differences between neurological patients and  
49 healthy controls were tested with the Mann-Whitney U test or the chi-square test ( $\alpha$ -levels of  
50  
51  
52  
53  
54  
55

Formatted: Font: Not Bold

significance  $p < 0.05$ ). To insure comparability of cohorts we formed age- and gender-matched pairs of patients and control subjects (allowing an age deviation of  $\pm 3$  years) according to a predefined algorithm. For the matching process we used alphabetical lists of names of male and female neurological patients and likewise of healthy controls, sorted by age. Then working down the list we searched manually to find for each neurological patient one control subject of the same age. If no match was found then we looked for a control that was one year younger, then one year older, then two years and finally three years younger respectively older. Only complete sets of data were included in the calculations and no approximates to replace missing values were computed. Calculations were performed with SPSS® statistical software PASW statistics 18. Potential bias and how it was addressed will be dealt with in the section on limitations.

Formatted: Font: Not Bold

## RESULTS

During a period of 10 months we recruited 298 mobile neurological outpatients and 214 healthy controls aged 60 years and over. In the group of healthy controls 21 patients initially recruited could not be included in the study due to neurological symptoms and signs, or a history of a neurological disorder. In the group of neurological patients another 70 patients had to be excluded from the study because at the time of the interview they ( $n=1045\%$ ) or their caregiver ( $n=69\%$ ) requested exclusion, the telephone number on record had been disconnected ( $n=2434\%$ ), all attempts to contact them failed ( $n=1146\%$ ), they had become so disabled that they could no longer participate in the survey ( $n=1045\%$ ), they had died ( $n=45\%$ ), or for other reasons ( $n=58\%$ ).

Prior to recruitment, twenty patients were excluded because of inability to walk unaided and one due to severe dementia. Of those that met inclusion criteria five rejected enrolment and six other patients could not be enrolled due to inadequate language skills ( $n=1$ ), severe aphasia ( $n=1$ ), or severe presbycusis ( $n=4$ ).

Formatted: Left

Formatted: Font: (Default) Liberation Serif, English (U.K.)

The statistical analysis thus covered 228 neurological outpatients (aged  $74.5 \pm 7.8$ ; 61% women) and 193 healthy controls. The matching process led to 171 pairs of neurological patients and healthy controls, 101 women and 70 men in each group, aged 72.0 and 72.2 years, respectively. The details of these subjects are summarized in Table 1.

### Incidence of falls in neurological patients and healthy controls

One hundred and six (46.5%) neurological patients but only 31 (16.1%) healthy controls had fallen

at least once ( $\text{Chi}^2=43.4$ ;  $p < 0.001$ ) during this one-year period. Out of 126 neurological patients experiencing falls, 76 (71.7%) fell once or twice, 22 (20.8%) three to five times, three (2.8%) six to nine times, three (2.8%) 11-20 times and two (1.9%) more than 20 times. In the group of healthy controls, out of 76 individuals with a history of falls, 24 (77.4%) fell once or twice, and seven (22.6%) three to five times, but none more often than that. In the matched cohorts as well falls were more frequent in neurological patients (42.1%) than in healthy controls (16.9%) ( $\text{Chi}^2=26.3$ ;  $p < 0.001$ ). (Table 1)

The mean age of individuals with a history of falls as compared to those without was higher both in the neurologically affected (fallers:  $76.7 \pm 7.6$  vs. nonfallers:  $72.6 \pm 7.5$ ;  $p < 0.001$ ) and in healthy controls (fallers:  $73.3 \pm 6.5$  vs. nonfallers:  $71.0 \pm 6.9$ ;  $p = 0.040$ ). In the group of neurological patients, 75 of 106 fallers (71%) were female, but only 31 (29%) were male ( $\text{Chi}^2=8.675$ ;  $p = 0.003$ ). Similarly, in the group of healthy controls a higher percentage of fallers was female, with 23 out of 31 (74%), but this did not reach significance ( $\text{Chi}^2=1.915$ ;  $p = 0.166$ ).

The occurrence of falls in neurological patients was independent of where they lived. For healthy controls, however, their place of residence had an influence, in that subjects living in more rural environments were more prone to falls ( $\Gamma\text{-B}=0.217$ ;  $p < 0.001$ ).

~~Repeated-Multiple~~ falls occurred particularly in patients with peripheral neuropathy (43%), peripheral nerve lesion (43%), dementia (33%), Parkinson's disease (30%), stroke (30%) and vertebral pain (30%). The average fall frequency index in this group of ~~five diseases patients with frequent falls~~ ranged from 1.63 (peripheral neuropathy) to 1.33 (dementia). ~~The proportion of fallers in each index category is shown for all these diseases in~~ (Fig. 1.)

### Risk factors for falls in neurological patients

The type of neurological disease the patient was afflicted with influenced the ~~proportion of fallers frequency of falls~~ in that patients post stroke (89%), with Parkinson's disease (77%), dementia (60%) and epilepsy (57%) had the highest frequency of falls. The lowest likelihood of falls was found in patients suffering from tinnitus (30%) and headache (28%), but was still higher than that of the average healthy control (16.1%). (Fig. 2)

The respective odds ratios are shown in table 2 and range from 40.1 (stroke) to 2.1 (headache) and

the relative risk of falling ranges between 5.5 for stroke patients and 1.8 for patients with headache.

No specific combination of two or three neurological diseases characterized by substantial gait or balance impairment but any accumulation of several neurological diseases regardless of their influence on gait or balance was able to cause a significant raise in falls ( $\Gamma$ -B=0.303;  $p<0.001$ ).

Other risk factors for falls in neurological patients were female gender ( $\Gamma$ -B=0.195;  $p=0.003$ ), higher age ( $\Gamma$ -B=0.217;  $p<0.001$ ), higher disability or disease severity as measured by the Barthel Index ( $\Gamma$ -B=-0.232;  $p<0.001$ ). Higher disability scores in Parkinson patients expressed by higher UPDRS II (activities of daily living) scores ( $\Gamma$ -B=-0.238;  $p=0.062$ ) and higher Schwab & England scores ( $\Gamma$ -B=-0.235;  $p=0.070$ ) resulted in a trend toward more frequent falls ( ~~$\Gamma$ -B=-0.238;  $p=0.062$~~ ). Severity of depression as reflected by a higher ADS score ( $\Gamma$ -B=0.329;  $p<0.001$ ) and low balance confidence reflected by higher ABC scores ( $\Gamma$ -B=-0.384;  $p<0.001$ ) were also identified as risk factors predictive (Fig. 3).

## DISCUSSION

### Incidence of falling

Our study suggests that even in patients mildly to moderately affected by neurological impairments the incidence of falls was three times higher than in subjects without any neurological symptoms or signs. To our knowledge this is the first survey conducted on elderly neurological outpatients and controls proven to be without neurological impairments, but the extent of this increased relative risk in neurological patients was unexpected, and resulted from low incidence figures in the group of controls and particularly high figures in the patient group.

In our group of healthy controls the 12-month incidence (16.1 %) was considerably lower than in previous population based data serving as a reference for previous studies<sup>20</sup>. Literature suggests that a third to one half of the community dwelling population of 60+ experience falls each year. For a group of 1762 subjects 60+ years of age, Lord reported a yearly incidence rate of falls of 28%<sup>21</sup>. In individuals of 65 years and older Prudham found in his survey conducted on 2793 individuals that 28% experienced one or more falls in the last year<sup>22</sup>. In O'Loughlin's group of 409 it was 29%<sup>7</sup>, in Campbell's group of 533, 33%<sup>23</sup>, and in Blake's group of 1042, 35%.<sup>24</sup> Luukinen's group of 833 individuals aged 70+ showed a 30% annual rate of falls<sup>3</sup> and Tinetti's group of 336 aged 75+ showed a rate of 32%<sup>25</sup>. For the very old, Campbell found in a community-based prospective study based on 761 subjects that half of those age 80 years and over have a fall every year<sup>26</sup>. This inci-

Field Code Changed

1  
2  
3  
4  
5  
6  
7  
8  
9  
10  
11  
12  
13  
14  
15  
16  
17  
18  
19  
20  
21  
22  
23  
24  
25  
26  
27  
28  
29  
30  
31  
32  
33  
34  
35  
36  
37  
38  
39  
40  
41  
42  
43  
44  
45  
46  
47  
48  
49  
50  
51  
52  
53  
54  
55  
56  
57  
58  
59  
60

dence rate, twice or three times that of our figures, did not surprise us. Population-based data of elderly individuals inevitably include a considerable number of patients suffering from neurological diseases or other forms of gait or balance problems. Many of these neurological disorders like stroke, Alzheimer's disease or Parkinson's disease are typical diseases of the elderly and others like epilepsy or traumatic brain injury also have a second peak in higher age<sup>27</sup>. This shows ~~how important it is~~ that it can be of advantage, when studying groups of elderly patients, to have a truly healthy control group, as in our survey.

Our study also shows that half of all ambulatory neurological patients had had at least one fall within the last 12 month. As to our knowledge this is the first survey of neurological outpatients, the lack of comparative data gave us no choice but to relate our findings to Stolze's data on neurological inpatients showing, much to our surprise, a falling incidence as low as 34%<sup>13</sup>. One would have assumed that Stolze's patients, who required inpatient treatment for their neurological conditions, would be more severely disabled and thus more prone to falls than outpatients. It also appears contradictory our findings that indicators of disease severity like the Barthel index and the UPDRS II correlated positively with the incidence of falls. Several studies further support this concept by stating that the more severely affected patients are, the higher the falling risk<sup>28</sup>. However, we have reasons to believe that the correlation is not linear throughout all grades of disability but rather resembles an inverse U-shaped curve. We think that the initial propensity for falls increases with higher disability only up to a certain point. Then, as patients become more cautious and use all kind of supports, it plateaus and even decreases. When patients become so disabled that they are finally bedridden, the risk approaches zero with the lack of opportunities to fall. Our values so would be located on the inclining leg close to the peak and Stolze's further down on the declining leg. Since this concept is not yet backed up by sound evidence, further studies directly comparing the risk of falling in neurological inpatients and outpatients of various grades of disability are needed to support this assumption.

Considering recurrent falls we found that in the group of neurological patients 13.2% fell three or more times per year, compared to 3.6% in the group of healthy controls. This is in keeping with the results of studies investigating recurrent falls, where figures of 8% for three or more falls in randomly selected community dwelling elderly individuals are given<sup>29</sup> and 10% for community based seniors using home care services<sup>30</sup>. In Stolze's cohort of inpatients the value of 21% for recurrent falls was higher and can probably be explained by methodological differences. Stolze's category of recurrent falls already includes patients who had fallen twice, unlike our and other studies<sup>29,30</sup> that include patients only after more than three falls.

#### **Risk factors contributing to falls**



1  
2  
3  
4  
5  
6 We found out that the type of neurological disease afflicting a patient determines the potential risk  
7 factor for falls. Here, two diseases stood out: stroke patients were 6 times (89%) and Parkinson pa-  
8 tients 5 times (71%) more likely to suffer falls than healthy controls (16%). This is in keeping with  
9 previous community based studies showing a high likelihood for falls in stroke patients with a range  
10 of 51-73%<sup>10, 20, 31</sup> and in Parkinson's patients with a range of 38 – 87%<sup>32-38</sup>. This was followed by  
11 a group of neurological diseases with an almost 4 times higher likelihood (55-60%) of falls, consist-  
12 ing of dementia, epilepsy, other movement disorders, other vascular diseases and peripheral neu-  
13 ropathy. These diseases are also known to carry a high risk for falls, with an annual fall rate of 60-  
14 80%<sup>12, 39</sup> in Alzheimer patients and 55-65%<sup>40-42</sup> in patients with peripheral neuropathy. The only  
15 study conducted on falls in elderly patients suffering from epilepsy is one on care facility residents,  
16 providing a 5-year fall incidence of 83%<sup>43</sup>. In our sample peripheral neuropathy also proved to be a  
17 risk factor for recurrent falls, but most likely significance was not reached due to the small sample  
18 size (p=0.061). Confirmative data also obtained from small cohorts revealed that repetitive falls oc-  
19 curred in 10 out of 25 (40%) neuropathy patients<sup>42</sup> and another 13 out of 20 neuropathy patients  
20 (65%) had a propensity for recurrent falls for an average of 5.8 falls per year<sup>40</sup>. New and quite  
21 astonishing was the fact that even patients suffering from neurological diseases with no direct influ-  
22 ence on gait or balance like headache (28%) had almost twice as many falls as the average healthy  
23 control (16.1%). Also new is that in contrast to all the above cited data derived from studies on pa-  
24 tients with only one neurological disorder, our survey provides comparative values for several neu-  
25 rological diseases of elderly ambulatory neurological patients for the first time, allowing a direct  
26 comparison between these disorders and a ranking according to the risk of falling.

27  
28  
29  
30  
31  
32  
33  
34  
35  
36 But our findings further suggest that not only the type of neurological conditions, but also the num-  
37 ber of neurological diseases a patient was suffering from, no matter whether they had an influence  
38 on gait or balance, correlated with the risk of falling. This came as a surprise as we assumed that  
39 only accumulations of neurological deficits relating to gait and balance would influence the risk for  
40 falls. Although there were no published studies on the influence of neurological diseases, it is  
41 known that persons with an impaired sense of balance have an disproportionately higher risk for  
42 falls when they acquire an additional new disease or condition, even if it is one that seems minor or  
43 not related to falling per se. Tinetti was able to demonstrate that the number of chronic diseases a  
44 patient was suffering from was highly predicative of a risk to fall, better even than a mobility score.  
45 She concluded that falling appears to result from an accumulated effect of multiple specific disabili-  
46 ties<sup>44</sup>. This would be in keeping with our other findings, that old age in combination with any neu-  
47 rological disease increases the risk of falling above that of healthy controls, even if it is a disease  
48 like headache. Also in accordance with this we found that a higher rate of depression, as reflected  
49 by a higher ADS-score, also increased the risk for falls. An alternative explanation for this could be

1  
2  
3  
4  
5  
6 that depressive thoughts are frequently combined with negative conceptions of one's own sense of  
7 balance, which was found to be a prominent risk factor for falls in our and previous other studies <sup>45</sup>.  
8 That higher age would be a predictive factor for falls in neurological patients replicates previous  
9 findings <sup>13</sup> and is easy to explain: old age is often associated with greater frailty and eventually  
10 frailty with less confidence in one's sense of balance and a higher incidence of falls <sup>45</sup>. That females  
11 are more prone to falls than males has often been stated before <sup>13</sup> and has previously been explained  
12 by a fear of falling and a loss of confidence – both independent risk factors for falls - being more  
13 prominent in women <sup>6</sup>.  
14  
15  
16  
17  
18  
19

## 20 LIMITATIONS

21  
22  
23 We also faced several limitations in our study. First and most importantly, like most other surveys  
24 dealing with falls, we faced the problem that the number of falls is underreported. Elderly subjects  
25 often try to downplay problems regarding their mobility for fear of having their autonomy  
26 restricted. While this is in general typically found in the healthy elderly, it might be even more  
27 prominent in patients with disabilities. But even remembering these events might pose a problem in  
28 some of the patients with central degenerative diseases and this might have been a relevant factor in  
29 our study, even though we excluded patients with severe dementia. The risk for falls in neurological  
30 patients might therefore be greater than shown in any results. Future prospective studies could  
31 minimize this problem by using patients diaries according to established guidelines for reporting  
32 falls <sup>46</sup> possibly even in combination with wearable miniaturized electronic devices apt to  
33 objectively detect and monitor falls <sup>47</sup>.  
34  
35  
36  
37  
38

39 Secondly, the large drop out rate of 23% from neurological assessment to interview, not containing  
40 the 3.6% that had to be excluded prior to recruitment due to inability or unwillingness to participate  
41 almost one quarter of neurological patients were lost for follow up, which could have lead to further  
42 underestimating the number of patients with falls. However, since these patients did not obviously  
43 differ in their baseline characteristics, we assume this problem to be minimal.  
44  
45

46 ~~Thirdly, elderly subjects without even the slightest neurological symptoms are hard to find and~~  
47 ~~therefore the use of a cohort of this rare group of supranormal individuals as a reference group~~  
48 ~~might not be representative. The patient cohort we examined was a group of neurological patients~~  
49 ~~who were mobile and affected by only mild to moderate neurological symptoms. This group of~~  
50 ~~elderly patients, of the kind typically seen in neurological practice, also accounts for only a part of~~  
51 ~~neurological patients and generally performs much better than the large segment of more severely~~  
52 ~~affected patients placed in institutions. But to highlight the impact of even mild impairment on falls,~~  
53  
54  
55

~~we nevertheless felt that it was of importance to use controls with no impairment, regardless of how many percent of the population they might represent.~~

Then, we would also like to address the issue of small sample sizes in subgroups of neurological diseases. Some of the groups like vascular diseases, movement disorders, vertebral pain and peripheral neuropathy are adequately sized, and even outnumber subjects of single disease studies like those on peripheral neuropathy<sup>40, 42</sup>. Others, particularly the dementia group with only seven patients, is, due to the exclusion of the more affected, quite small and allows only limited extrapolation. Nevertheless it is remarkable that even here the analysis of difference reached levels of significance.

~~Finally, this study was performed on participants of a mid-sized central European city and surrounding countryside with patients to a large percentage of Caucasian origin which raises the question as to what extent our study results can be generalized to other geographical locations. However, almost all other studies on falls were also performed in similar settings. Given the fact that incidence figures were all in the range of previous studies conducted in other western developed countries we believe that our findings should in general well reflect falling risks in similar settings of these regions. However, due to lack of data, we cannot make any suggestions as to whether comparable results could be expected in emerging South American, Asian or African countries. There technical and cultural barriers as well as support systems probably have constituted different mobility environments for elderly people. To investigate the impact of neurological impairment on risk for falls in the elderly in these regions would be an important topic for future projects.~~

## CONCLUSION

It can be said that we managed to show, apparently for the first time, that even among ambulatory neurological outpatients, falls are alarmingly frequent. The aetiology of falls is multi-factorial, but the connection between falls and disturbances of the sensorimotor system frequently found in neurological diseases in elderly patients is of great importance. Our findings revealed that even neurological diseases not directly connected with gait and balance carry an astonishingly high risk for falls. General practitioners, geriatricians, neurologists and carersNeurologists should therefore be aware that their neurological patients are at high risk for falls, as any neurological deficit increases this risk, even more so if a combination of factors is present. Of course the risk has to be evaluated individually, but patients with central diseases like stroke, Parkinson's disease, dementia and epilepsy, and for

Formatted: Indent: Left: 0.49", Line spacing: 1.5 lines

1  
2  
3  
4  
5  
6 repeated falls also patients with peripheral neurological disorders, require special attention.  
7 Greater disability, higher age, female gender, depression and low confidence in the sense of  
8 balance are additional contributory factors that have to be taken into account in this process.  
9 For patients with several of these factors, targeted prevention programs should be  
10 implemented, ~~because~~ ~~However, although~~ they have been shown to generally reduce falls  
11 and injuries ~~in the community dwelling elderly~~<sup>48</sup>, ~~there is but inconclusive evidence for~~  
12 ~~patients following stroke~~<sup>49</sup> ~~and with PD~~<sup>50, 51</sup> ~~and even more scanty information for patients~~  
13 ~~with other neurological diseases.~~ ~~Therefore~~ ~~Due to the prevalence of falls and the personal~~  
14 ~~and social impact they have on the lives of many, it seems important that~~ further larger scale  
15 multicenter neuro-geriatric surveys with larger sample sizes for neurological subgroups  
16 should be performed ~~not only to confirm our observations~~ ~~and but to~~ acquire more  
17 extensive knowledge of the effectiveness of preventive measures in patient cohorts with  
18 various neurological conditions and different degrees of disability. These studies should also  
19 include more objective monitoring systems and include further potential risk factors like  
20 medication and fear of falling.  
21  
22  
23  
24  
25  
26  
27  
28  
29  
30  
31  
32

Field Code Changed

Field Code Changed

Formatted: Font: Times New Roman

Field Code Changed

Field Code Changed

Formatted: English (U.K.)

### NOTES

33 Acknowledgements: We acknowledge the study participants for their help and participation.

34 Funding and Competing interests: All authors have completed the Unified Competing Interest form  
35 and declare: no support from any organisation for the submitted work; no financial relationships  
36 with any organisations that might have an interest in the submitted work in the previous three years;  
37 and no other relationships or activities that could appear to have influenced the submitted work.  
38 Thus, neither the study nor the salary of participants was funded by any third party.

39 Ethical approval: This study was approved by the Ethics Committee of the Medical University Graz

40 Patient consent: obtained  
41  
42  
43  
44  
45  
46  
47  
48  
49  
50  
51  
52  
53  
54  
55  
56  
57  
58  
59  
60

## REFERENCES

1. WHO. WHO global report on falls prevention in older age. Geneva, Switzerland: World Health Organization, 2007.
2. Gillespie LD. Preventing falls in older people: the story of a Cochrane review. *Cochrane database of systematic reviews* 2013;2:ED000053.
3. Luukinen H, Koski K, Hiltunen L, Kivela SL. Incidence rate of falls in an aged population in northern Finland. *Journal of clinical epidemiology* 1994;47:843-850.
4. Sattin RW, Lambert Huber DA, DeVito CA, et al. The incidence of fall injury events among the elderly in a defined population. *American journal of epidemiology* 1990;131:1028-1037.
5. Sleet DA, Moffett DB, Stevens J. CDC's research portfolio in older adult fall prevention: a review of progress, 1985-2005, and future research directions. *Journal of safety research* 2008;39:259-267.
6. Collerton J, Kingston A, Bond J, et al. The personal and health service impact of falls in 85 year olds: cross-sectional findings from the Newcastle 85+ cohort study. *PloS one* 2012;7:e33078.
7. O'Loughlin JL, Robitaille Y, Boivin JF, Suissa S. Incidence of and risk factors for falls and injurious falls among the community-dwelling elderly. *American journal of epidemiology* 1993;137:342-354.
8. Deandrea S, Lucenteforte E, Bravi F, Foschi R, La Vecchia C, Negri E. Risk factors for falls in community-dwelling older people: a systematic review and meta-analysis. *Epidemiology* 2010;21:658-668.
9. Guillochon A, Crinquette C, Gaxatte C, et al. [Neurological diseases detected in the Lille Multidisciplinary Falls Consultation]. *Revue neurologique* 2010;166:235-241.
10. Lamb SE, Ferrucci L, Volapto S, et al. Risk factors for falling in home-dwelling older women with stroke: the Women's Health and Aging Study. *Stroke; a journal of cerebral circulation* 2003;34:494-501.
11. Paul SS, Canning CG, Sherrington C, Lord SR, Close JC, Fung VS. Three simple clinical tests to accurately predict falls in people with Parkinson's disease. *Movement disorders : official journal of the Movement Disorder Society* 2013;28:655-662.
12. Horikawa E, Matsui T, Arai H, Seki T, Iwasaki K, Sasaki H. Risk of falls in Alzheimer's disease: a prospective study. *Internal medicine* 2005;44:717-721.
13. Stolze H, Klebe S, Zechlin C, Baecker C, Friege L, Deuschl G. Falls in frequent neurological diseases--prevalence, risk factors and aetiology. *J Neurol* 2004;251:79-84.
14. Mahoney FI, Barthel DW. Functional Evaluation: The Barthel Index. *Maryland state medical journal* 1965;14:61-65.
15. Fahn S ER, ed. Unified Parkinsons Disease Rating Scale. Florham Park: Macmillan Healthcare Information, 1987.
16. Hautzinger MB, Maya. Allgemeine Depressions Skala, Manual. Göttingen: Beltz Test GmbH, 1993.
17. Radloff LS. The CES-D Scale. *Applied Psychological Measurement* 1977;1:385-401.
18. Schrag A, Barone P, Brown RG, et al. Depression rating scales in Parkinson's disease: critique and recommendations. *Movement disorders : official journal of the Movement Disorder Society* 2007;22:1077-1092.
19. Peretz C, Herman T, Hausdorff JM, Giladi N. Assessing fear of falling: Can a short version of the Activities-specific Balance Confidence scale be useful? *Movement disorders : official journal of the Movement Disorder Society* 2006;21:2101-2105.
20. Forster A, Young J. Incidence and consequences of falls due to stroke: a systematic inquiry. *Bmj* 1995;311:83-86.

Formatted: Spanish (International Sort)

21. Lord SR, Sambrook PN, Gilbert C, et al. Postural stability, falls and fractures in the elderly: results from the Dubbo Osteoporosis Epidemiology Study. *The Medical journal of Australia* 1994;160:684-685, 688-691.
22. Prudham D, Evans JG. Factors associated with falls in the elderly: a community study. *Age and ageing* 1981;10:141-146.
23. Campbell AJ, Borrie MJ, Spears GF, Jackson SL, Brown JS, Fitzgerald JL. Circumstances and consequences of falls experienced by a community population 70 years and over during a prospective study. *Age and ageing* 1990;19:136-141.
24. Blake AJ, Morgan K, Bendall MJ, et al. Falls by elderly people at home: prevalence and associated factors. *Age and ageing* 1988;17:365-372.
25. Tinetti ME, Speechley M, Ginter SF. Risk factors for falls among elderly persons living in the community. *The New England journal of medicine* 1988;319:1701-1707.
26. Campbell AJ, Borrie MJ, Spears GF. Risk factors for falls in a community-based prospective study of people 70 years and older. *Journal of gerontology* 1989;44:M112-117.
27. Hirtz D, Thurman DJ, Gwinn-Hardy K, Mohamed M, Chaudhuri AR, Zalutsky R. How common are the "common" neurologic disorders? *Neurology* 2007;68:326-337.
28. Schmid AA, Kapoor JR, Dallas M, Bravata DM. Association between stroke severity and fall risk among stroke patients. *Neuroepidemiology*;34:158-162.
29. Soriano TA, DeCherrie LV, Thomas DC. Falls in the community-dwelling older adult: a review for primary-care providers. *Clinical interventions in aging* 2007;2:545-554.
30. Fletcher PC, Hirdes JP. Risk factors for falling among community-based seniors using home care services. *The journals of gerontology Series A, Biological sciences and medical sciences* 2002;57:M504-510.
31. Yates JS, Lai SM, Duncan PW, Studenski S. Falls in community-dwelling stroke survivors: an accumulated impairments model. *Journal of rehabilitation research and development* 2002;39:385-394.
32. Balash Y, Peretz C, Leibovich G, Herman T, Hausdorff JM, Giladi N. Falls in outpatients with Parkinson's disease: frequency, impact and identifying factors. *Journal of neurology* 2005;252:1310-1315.
33. Koller WC, Glatt S, Vetere-Overfield B, Hassanein R. Falls and Parkinson's disease. *Clinical neuropharmacology* 1989;12:98-105.
34. Ashburn A, Stack E, Pickering RM, Ward CD. Predicting fallers in a community-based sample of people with Parkinson's disease. *Gerontology* 2001;47:277-281.
35. Gray P, Hildebrand K. Fall risk factors in Parkinson's disease. *The Journal of neuroscience nursing : journal of the American Association of Neuroscience Nurses* 2000;32:222-228.
36. Wood BH, Bilclough JA, Bowron A, Walker RW. Incidence and prediction of falls in Parkinson's disease: a prospective multidisciplinary study. *Journal of neurology, neurosurgery, and psychiatry* 2002;72:721-725.
37. Pickering RM, Grimbergen YA, Rigney U, et al. A meta-analysis of six prospective studies of falling in Parkinson's disease. *Movement disorders : official journal of the Movement Disorder Society* 2007;22:1892-1900.
38. Hely MA, Reid WG, Adena MA, Halliday GM, Morris JG. The Sydney multicenter study of Parkinson's disease: the inevitability of dementia at 20 years. *Movement disorders : official journal of the Movement Disorder Society* 2008;23:837-844.
39. Ryan JJ, McCloy C, Rundquist P, Srinivasan V, Laird R. Fall risk assessment among older adults with mild Alzheimer disease. *J Geriatr Phys Ther*;34:19-27.
40. DeMott TK, Richardson JK, Thies SB, Ashton-Miller JA. Falls and gait characteristics among older persons with peripheral neuropathy. *American journal of physical medicine & rehabilitation / Association of Academic Physiatrists* 2007;86:125-132.
41. Richardson JK, Ching C, Hurvitz EA. The relationship between electromyographically documented peripheral neuropathy and falls. *Journal of the American Geriatrics Society* 1992;40:1008-1012.

- 1  
2  
3  
4  
5  
6 42. Richardson JK, Hurvitz EA. Peripheral neuropathy: a true risk factor for falls. *The journals of gerontology Series A, Biological sciences and medical sciences* 1995;50:M211-215.
- 7  
8 43. Flierl-Hecht A, Pfafflin M, May TW, Kohlschutter S, Hensel B, Stefan H. [Is epilepsy in the elderly overlooked? An investigation in a home for the aged]. *Der Nervenarzt* 2003;74:691-698.
- 9  
10 44. Tinetti ME, Williams TF, Mayewski R. Fall risk index for elderly patients based on number of chronic disabilities. *The American journal of medicine* 1986;80:429-434.
- 11  
12 45. Kose N, Cuvalci S, Ekici G, Otman AS, Karakaya MG. The risk factors of fall and their correlation with balance, depression, cognitive impairment and mobility skills in elderly nursing home residents. *Saudi medical journal* 2005;26:978-981.
- 13  
14 46. Lamb SE, Jorstad-Stein EC, Hauer K, Becker C, Prevention of Falls Network E, Outcomes Consensus G. Development of a common outcome data set for fall injury prevention trials: the Prevention of Falls Network Europe consensus. *Journal of the American Geriatrics Society* 2005;53:1618-1622.
- 15  
16 47. Howcroft J, Kofman J, Lemaire ED. Review of fall risk assessment in geriatric populations using inertial sensors. *Journal of neuroengineering and rehabilitation* 2013;10:91.
- 17  
18 48. Oliver D, Connelly JB, Victor CR, et al. Strategies to prevent falls and fractures in hospitals and care homes and effect of cognitive impairment: systematic review and meta-analyses. *Bmj* 2007;334:82.
- 19  
20 49. Verheyden GS, Weerdesteyn V, Pickering RM, et al. Interventions for preventing falls in people after stroke. *Cochrane database of systematic reviews* 2013;5:CD008728.
- 21  
22 50. Goodwin VA, Richards SH, Henley W, Ewings P, Taylor AH, Campbell JL. An exercise intervention to prevent falls in people with Parkinson's disease: a pragmatic randomised controlled trial. *Journal of neurology, neurosurgery, and psychiatry* 2011;82:1232-1238.
- 23  
24 51. Li F, Harmer P, Fitzgerald K, et al. Tai chi and postural stability in patients with Parkinson's disease. *The New England journal of medicine* 2012;366:511-519.
- 25  
26  
27  
28  
29  
30  
31  
32  
33  
34  
35  
36  
37  
38  
39  
40  
41  
42  
43  
44  
45  
46  
47  
48  
49  
50  
51  
52  
53  
54  
55  
56  
57  
58  
59  
60

TABLES AND FIGURES

Table 1: Neurological patients and healthy controls: General demographics and fall frequency

|                                   | Total               |                    |         | Matched pairs       |                    |         |
|-----------------------------------|---------------------|--------------------|---------|---------------------|--------------------|---------|
|                                   | Patients<br>(n=228) | Healthy<br>(n=193) | p-value | Patients<br>(n=171) | Healthy<br>(n=171) | p-value |
| <b>Total</b>                      |                     |                    |         |                     |                    |         |
| Age                               | 74.5±7.8            | 71.4±6.8           | 0.000   | 72.2±7.0            | 72.0±6.9           | 0.839   |
| Gender (f in %)                   | 61%                 | 63%                | 0.572   | 59%                 | 59%                | 1.000   |
| <b>Fallers</b>                    |                     |                    |         |                     |                    |         |
| Falls (n (%))                     | 46.5%               | 16.1%              | 0.000   | 42.1%               | 16.9%              | 0.000   |
| Multiple Falls (>2 falls) (n (%)) | 28.3%               | 22.6%              | 0.528   | 26.4%               | 24.1%              | 0.815   |
| Fall frequency Index (in fallers) | 1.42±0.8            | 1.23±0.4           | 0.078   | 1.44±0.9            | 1.24±0.4           | 0.14    |

|                                  | Total               |                    |         | Matched pairs       |                    |         |
|----------------------------------|---------------------|--------------------|---------|---------------------|--------------------|---------|
|                                  | Patients<br>(n=228) | Healthy<br>(n=193) | p-value | Patients<br>(n=171) | Healthy<br>(n=171) | p-value |
| <b>Total</b>                     |                     |                    |         |                     |                    |         |
| Age                              | 74.5±7.8            | 71.4±6.8           | 0.000   | 72.2±7.0            | 72.0±6.9           | 0.839   |
| Gender (f in %)                  | 61%                 | 63%                | 0.572   | 59%                 | 59%                | 1.000   |
| Region (Residential Index: mean) | 2.53                | 2.21               | 0.021   | 2.66                | 2.22               | 0.004   |
| Disability (Bartelindex: mean)   | 98.20               | n.d.               |         | 98.24               | n.d.               |         |
| Balance (ABC-score: mean)        | 73.19               | n.d.               |         | 83.39               | n.d.               |         |
| Depression (ADS-K-score: mean)   | 7.2                 | n.d.               |         | 6.9                 | n.d.               |         |

Formatted: Justified, Level 1, No widow/orphan control, Don't hyphenate

Formatted: Justified, Level 1, No widow/orphan control, Don't hyphenate

Formatted: Justified, Level 1, Space Before: 0 pt, After: 0 pt, No widow/orphan control, Don't hyphenate

Formatted: Justified, Level 1, Space Before: 0 pt, After: 0 pt, No widow/orphan control, Don't hyphenate

Formatted: Justified, Level 1, Space Before: 0 pt, After: 0 pt, No widow/orphan control, Don't hyphenate

Formatted: Justified, Level 1, Space Before: 0 pt, After: 0 pt, No widow/orphan control, Don't hyphenate

Formatted: Justified, Level 1, Space Before: 0 pt, After: 0 pt, No widow/orphan control, Don't hyphenate

Formatted: Justified, Level 1, Space Before: 0 pt, After: 0 pt, No widow/orphan control, Don't hyphenate

Formatted: Justified, Level 1, Space Before: 0 pt, After: 0 pt, No widow/orphan control, Don't hyphenate

Formatted: Justified, Level 1, Space Before: 0 pt, After: 0 pt, No widow/orphan control, Don't hyphenate



1  
2  
3  
4  
5  
6  
7  
8  
9  
10  
11  
12  
13  
14  
15  
16  
17  
18  
19  
20  
21  
22  
23  
24  
25  
26  
27  
28  
29  
30  
31  
32  
33  
34  
35  
36  
37  
38  
39  
40  
41  
42  
43  
44  
45  
46  
47  
48  
49  
50  
51  
52  
53  
54  
55  
56  
57  
58  
59  
60

| Fallers                           |                 |                 |              |                 |                 |              |
|-----------------------------------|-----------------|-----------------|--------------|-----------------|-----------------|--------------|
| Falls (n (%))                     | <u>46.5%</u>    | <u>16.1%</u>    | <u>0.000</u> | <u>42.1%</u>    | <u>16.9%</u>    | <u>0.000</u> |
| Multiple Falls (>2 falls) (n (%)) | <u>28.3%</u>    | <u>22.6%</u>    | <u>0.528</u> | <u>26.4%</u>    | <u>24.1%</u>    | <u>0.815</u> |
| Fall frequency Index (in fallers) | <u>1.42±0.8</u> | <u>1.23±0.4</u> | <u>0.078</u> | <u>1.44±0.9</u> | <u>1.24±0.4</u> | <u>0.14</u>  |

For peer review only

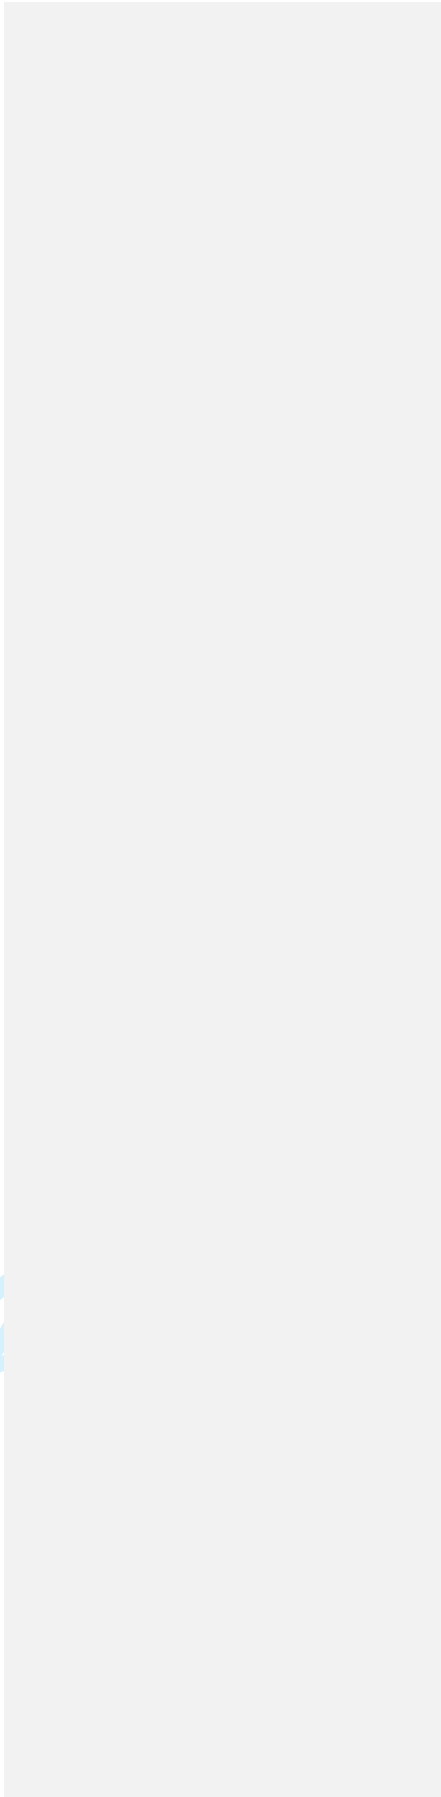

**Percentage of multifallers in various Neurological Diseases according to FFI categories**

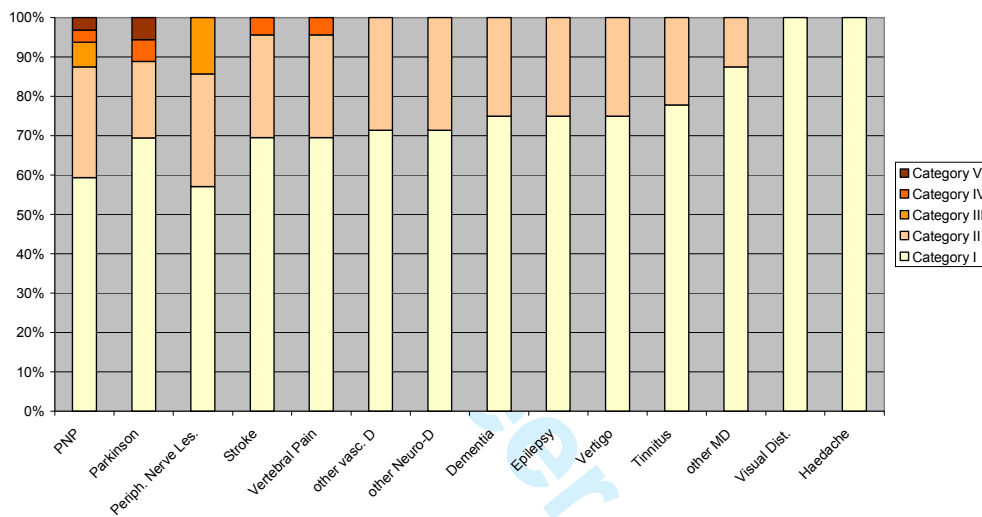

Formatted: Font: 12 pt, Check spelling and grammar

| <u>Cate-<br/>gories</u> | <u>PNP<br/>(n)</u> | <u>PD<br/>(n)</u> | <u>PNL<br/>(n)</u> | <u>Strok<br/>e<br/>(n)</u> | <u>Vert P<br/>(n)</u> | <u>other<br/>vasc<br/>(n)</u> | <u>Other<br/>n. D.<br/>(n)</u> | <u>Dem<br/>(n)</u> | <u>Epi<br/>(n)</u> | <u>Vertig<br/>(n)</u> | <u>Tinni-<br/>tus<br/>(n)</u> | <u>other<br/>MD<br/>(n)</u> | <u>Visual<br/>Dist<br/>(n)</u> | <u>Haed-<br/>ache<br/>(n)</u> |
|-------------------------|--------------------|-------------------|--------------------|----------------------------|-----------------------|-------------------------------|--------------------------------|--------------------|--------------------|-----------------------|-------------------------------|-----------------------------|--------------------------------|-------------------------------|
| V                       | 1                  | 2                 | 0                  | 0                          | 0                     | 0                             | 0                              | 0                  | 0                  | 0                     | 0                             | 0                           | 0                              | 0                             |
| IV                      | 1                  | 2                 | 0                  | 1                          | 1                     | 0                             | 0                              | 0                  | 0                  | 0                     | 0                             | 0                           | 0                              | 0                             |
| III                     | 2                  | 0                 | 1                  | 0                          | 0                     | 0                             | 0                              | 0                  | 0                  | 0                     | 0                             | 0                           | 0                              | 0                             |
| II                      | 9                  | 7                 | 2                  | 6                          | 6                     | 4                             | 4                              | 1                  | 1                  | 3                     | 2                             | 1                           | 0                              | 0                             |
| I                       | 19                 | 25                | 4                  | 16                         | 16                    | 10                            | 10                             | 3                  | 3                  | 9                     | 7                             | 7                           | 4                              | 4                             |
| 0                       | 27                 | 11                | 11                 | 3                          | 15                    | 11                            | 20                             | 3                  | 3                  | 18                    | 21                            | 6                           | 6                              | 10                            |
| <b>Total</b>            | <b>59</b>          | <b>47</b>         | <b>18</b>          | <b>26</b>                  | <b>48</b>             | <b>25</b>                     | <b>34</b>                      | <b>7</b>           | <b>7</b>           | <b>30</b>             | <b>30</b>                     | <b>14</b>                   | <b>10</b>                      | <b>14</b>                     |

**Fall Frequency Index in neurological patients**

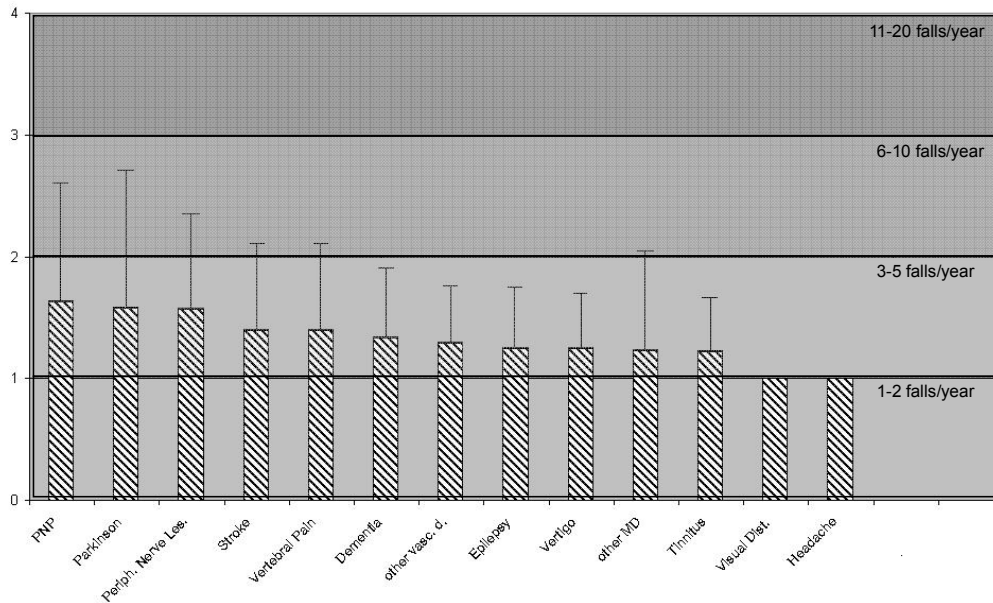

**Fig.1** Frequency of falls in neurological patients according to their neurological disorder. [Fall Frequency Index \(FFI\)](#)  
[Category I](#) = 1-2 falls in the last twelve months, [2-Category II](#) = 3-5, [3-Category III](#) = 6-10, [4-Category IV](#) = 11-20,  
 and [5-Category V](#) = more than 20.

**Abbreviations:** PNP = peripheral neuropathy, Periph. nerve les. = peripheral nerve lesion, other MD = other movement disorders, other vasc. d. = other vascular disease, Visual.Dist. = visual disturbances

One year fall incidence in common neurological disorders

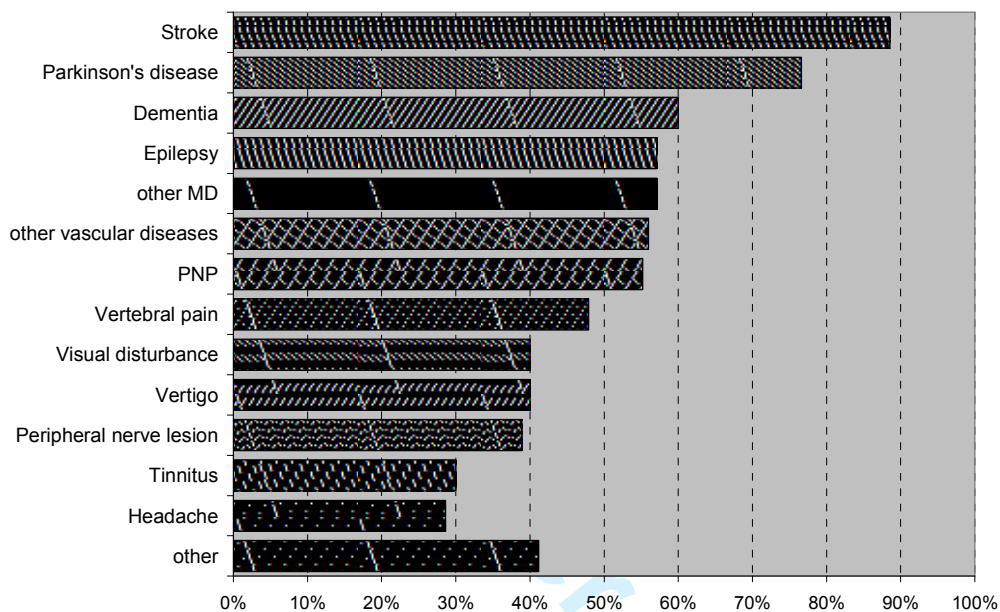

Fig.2 Difference in frequency of having at least one fall within the twelve-month period for patients suffering from the 13 most commonly encountered neurological disorders.

Table 2: Neurological Patient groups: General demographics and fall risk

| Diagnosis       | Age      | Bartel | Total<br>(n) | Falls<br>(n (%)) | Multiple<br>Falls*<br>(n (%)) | Fall fre-<br>quency**<br>(in fallers) | Risk of falling |              |         |
|-----------------|----------|--------|--------------|------------------|-------------------------------|---------------------------------------|-----------------|--------------|---------|
|                 |          |        |              |                  |                               |                                       | OR              | CI           | p-value |
| Stroke          | 82,7±2,3 | 99,76  | 26           | 23 (89%)         | 7 (30%)                       | 1,39±0,72                             | 40,1            | (11,3-141,7) | 0.000   |
| Parkinson D     | 74,8±8,1 | 99,79  | 47           | 36 (77%)         | 11 (31%)                      | 1,58±1,13                             | 17,1            | (7,9-37,2)   | 0.000   |
| Dementia        | 77,5±9,2 | 99,77  | 7            | 3 (60%)          | 1 (33%)                       | 1,33±0,58                             | 7,8             | (1,3-48,9)   | 0.01    |
| Epilepsy        | 71,0±8,2 | 99,78  | 7            | 4 (57%)          | 1 (25%)                       | 1,25±0,5                              | 7,0             | (1,5-32,7)   | 0.005   |
| other MD        | 74,3±7,9 | 100    | 14           | 8 (57%)          | 1 (13%)                       | 1,23±0,82                             | 7,0             | (2,3-21,5)   | 0.000   |
| other vasc. D   | 74,8±8,1 | 99,79  | 25           | 14 (56%)         | 4 (29%)                       | 1,29±0,47                             | 6,7             | (2,8-16,0)   | 0.000   |
| PNP             | 71,0±8,1 | 99,78  | 58           | 32 (55%)         | 13 (43%)                      | 1,63±0,98                             | 6,4             | (3,4-12,3)   | 0.000   |
| Vertebral Pain  | 76,8±9,1 | 99,75  | 48           | 23 (48%)         | 7 (30%)                       | 1,39±0,72                             | 4,8             | (2,4-9,5)    | 0.000   |
| Visual Disturb. | 69,5±0,7 | 99,77  | 10           | 4 (40%)          | 0 (0%)                        | 1±0                                   | 3,5             | (0,9-13,1)   | 0.051   |
| Vertigo         | 72,0±8,1 | 99,75  | 30           | 12 (40%)         | 3 (25%)                       | 1,25±0,45                             | 3,5             | (1,5-8,0)    | 0.002   |
| P. Nerve Les.   | 66,0±8,1 | 99,79  | 18           | 7 (39%)          | 3 (43%)                       | 1,57±0,79                             | 3,3             | (1,2-9,2)    | 0.016   |
| Tinnitus        | 74,3±8,4 | 99,76  | 30           | 9 (30%)          | 2 (22%)                       | 1,22±0,44                             | 2,2             | (0,9 - 5,3)  | 0.064   |
| Headache        | 74,8±8,1 | 99,79  | 14           | 4 (29%)          | 0 (0%)                        | 1,0±0,0                               | 2,1             | (0,6-7,1)    | 0,228   |
| Other           | 79,4±7,1 | 99,74  | 34           | 14 (41%)         | 4 (29%)                       | 1,29±0,47                             | 3,7             | (1,7 - 8,0)  | 0.001   |

\*) Multiple falls were defined as more than two falls per year (i.e. a fall frequency index >2)-

\*\*) Fall frequency index: **Category I** = 1-2 falls in the last twelve months, **Category II** = 3-5 falls in the last twelve months, **Category III** = 6-10 falls in the last twelve months, **Category IV** = 11-20 falls in the last twelve months, and **Category V** = more than 20 falls in the last twelve months.

Formatted: Font: 10 pt

Formatted: Font: 10 pt

Formatted: Font: 10 pt

1  
2  
3  
4  
5  
6  
7  
8  
9  
10  
11  
12  
13  
14  
15  
16  
17  
18  
19  
20  
21  
22  
23  
24  
25  
26  
27  
28  
29  
30  
31  
32  
33  
34  
35  
36  
37  
38  
39  
40  
41  
42  
43  
44  
45  
46  
47  
48  
49  
50  
51  
52  
53  
54  
55  
56  
57  
58  
59  
60

For peer review only



a) Balance confidence and occurrence of falls

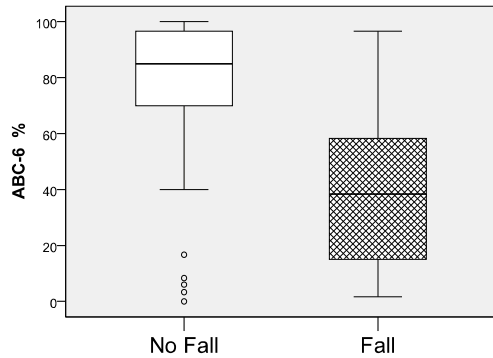

b) Neurological comorbidities and falls

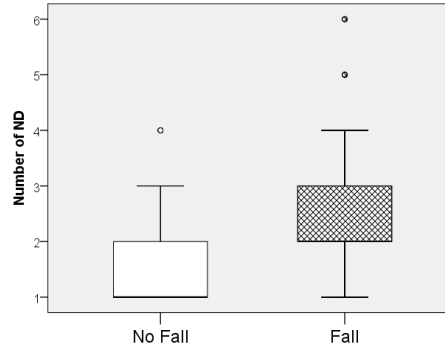

**Fig.3a,b** Differences in Activities-Specific Balance Confidence (ABC-6) scores (3a) and number of neurological diseases (ND) (3b) of ~~indicate that~~ neurological patients with and without falls indicate that fallers as compared to non-fallers those without have lower confidence in their balance and a higher number of concomitant neurological diseases.

(ABC-6% meaning percentage scores of the 6-item version of the Activities-Specific Balance Confidence scale, number of ND meaning number of neurological diseases a patient is afflicted with)

Formatted: Font: 10 pt

Formatted: Font: 10 pt



**The impact of various neurological disorders on the risk for falls in the community dwelling elderly: a case controlled study**

|                                 |                                                                                                                                                                                                                                                                                                                                                                                                                                                                                                                                           |
|---------------------------------|-------------------------------------------------------------------------------------------------------------------------------------------------------------------------------------------------------------------------------------------------------------------------------------------------------------------------------------------------------------------------------------------------------------------------------------------------------------------------------------------------------------------------------------------|
| Journal:                        | <i>BMJ Open</i>                                                                                                                                                                                                                                                                                                                                                                                                                                                                                                                           |
| Manuscript ID:                  | bmjopen-2013-003367.R2                                                                                                                                                                                                                                                                                                                                                                                                                                                                                                                    |
| Article Type:                   | Research                                                                                                                                                                                                                                                                                                                                                                                                                                                                                                                                  |
| Date Submitted by the Author:   | 23-Oct-2013                                                                                                                                                                                                                                                                                                                                                                                                                                                                                                                               |
| Complete List of Authors:       | Homann, Barbara; Medical University Graz, Neurology<br>Plaschg, Annemarie; Medical University Graz, Neurology<br>Grundner, Marion; Medical University Graz, Neurology<br>Haubenhofner, Alice; Medical University Graz, Neurology<br>Griedl, Theresa; Medical University Graz, Neurology<br>Ivanic, Gerd; Private Paracelsus Medical University Salzburg, Orthopedic Surgery<br>Hofer, Edith; Medical University Graz, Neurology<br>Fazekas, Franz; Medical University Graz, Neurology<br>Homann, Carl; Medical University Graz, Neurology |
| <b>Primary Subject Heading</b>: | Neurology                                                                                                                                                                                                                                                                                                                                                                                                                                                                                                                                 |
| Secondary Subject Heading:      | Geriatric medicine, Public health                                                                                                                                                                                                                                                                                                                                                                                                                                                                                                         |
| Keywords:                       | Falls, fall risk, elderly, community dwelling, neurological disorders                                                                                                                                                                                                                                                                                                                                                                                                                                                                     |
|                                 |                                                                                                                                                                                                                                                                                                                                                                                                                                                                                                                                           |

SCHOLARONE™  
Manuscripts

only



1  
2  
3  
4 **The impact of neurological disorders on the risk for falls in the community**  
5  
6 **dwelling elderly: a case controlled study**  
7  
8  
9

10  
11  
12 Homann, Barbara<sup>1</sup>; Plaschg, Annemarie<sup>1</sup>; Grundner, Marion<sup>1</sup>; Griedl, Theresa<sup>1</sup>; Ivanic, Gerd<sup>2</sup>;  
13  
14 Hofer, Edith<sup>1</sup>; Fazekas, Franz<sup>1</sup>; Homann, Carl Nikolaus<sup>1</sup>  
15

16  
17 <sup>1</sup>) Medical University Graz, Dept of Neurology, <sup>2</sup>) Paracelsus Medical University Salzburg, Dep. of  
18  
19 Orthopaedic Surgery  
20  
21  
22  
23  
24  
25  
26  
27  
28  
29  
30  
31  
32  
33  
34  
35  
36  
37  
38  
39  
40  
41  
42  
43  
44  
45  
46  
47  
48  
49  
50  
51  
52  
53  
54  
55  
56  
57  
58  
59  
60

**ABSTRACT**

**Objectives:** Owing to a lack of data, our aim was to evaluate and compare the impact of various common neurological diseases on the risk for falls in independent community dwelling senior citizens.

**Design:** Prospective case controlled study

**Setting:** General Hospital

**Participants:** Out of 298 consecutive patients and 214 controls enrolled, 228 patients (aged 74.5±7.8; 61% women) and 193 controls (aged 71.4±6.8; 63% women) were included. Exclusion criteria for patients were severe disability, disabling general condition, or severe cognitive impairment, for controls any history of neurological disorders or disabling medical conditions, and for both age below 60 years. A matching process led to 171 age- and gender-matched pairs of neurological patients and healthy controls.

**Main outcome measures:** One-year incidence of falls based on patients' 12 month recall; motor and non- motor function tests to detect additional risk factors.

**Results:** 46% of patients and 16% of controls fell at least once a year. Patients with stroke (89%), Parkinson's disease (77%), dementia (60%) or epilepsy (57%) had a particularly high **proportion of fallers**, but even **subgroups of** patients with the least fall-associated neurological diseases like tinnitus (30%) and headache (28%) had a higher **proportion of fallers** than the control group. Neuropathies, peripheral nerve lesions and Parkinson's disease were predisposing to recurrent falls. A higher number of neurological comorbidities ( $p<0.001$ ), lower Barthel Index values ( $p<0.001$ ), lower Activities-Specific Balance Confidence scores ( $p<0.001$ ), and higher Center of Epidemiological Studies Depression scores ( $p<0.001$ ) as well as higher age ( $p<0.001$ ) and female gender ( $p=0.003$ ) proved to further increase the risk of falls.

**Conclusions:** Medical practitioners, allied health professionals and carers should be aware that all elderly neurological patients seen in outpatient settings are potentially at high risk for falls; they should query them routinely about previous falls and fall risks and advise them on preventive strategies.

## Article summary

### *Article focus*

- Previous studies have shown that falls in the elderly are common and substantial amount of data on single neurological conditions like stroke and Parkinson's disease suggest that neurological impairments further increase the risk for falls.
- However, little is known on the influence of a broad range of neurological diseases and how they differ among each other.
- The aim of this study is to provide comparative data on the risk of falling in ambulatory elderly subjects afflicted with various common neurological diseases and to evaluate the role of additional risk factors.

### *Key messages*

- The results of our study suggest that all elderly neurological patients even when still ambulatory carry a heightened risk for falls.
- The impact differs according to disease but those with impairments of the sensorimotor system are particularly endangered. However our findings investigating yet unstudied populations, eg, such as headache revealed that even neurological disorders not directly connected with gait and balance carry an unexpected high risk for falls and that there is a cumulative effect of more than one neurological condition on the risk of falls.

### *Strengths and limitations of this study*

- Strengths of this study include the prospective study design, the number of standardised outcome measures, the standardised assessment of neurological patients and the thorough examination and inclusion of healthy controls.
- The following limitations should be considered: although the design is prospective, the falls history is retrospective, based on patients' recall over 12 months, therefore underreporting of cases is possible. Small sample sizes in some of the subgroups of neurological diseases. Participants were mostly of Caucasian origin and there was a high drop-out rate, which may limit the generalisability of the results to other populations.

## INTRODUCTION

Due to budget cuts and austerity measures the costs of accidents and falls have come into the spotlight of health policy makers. The World Health Organisation too has recently made fall prevention in the elderly one of its top priorities. The WHO Global Report on Falls Prevention in Older Age states that due to the high percentage of elderly people worldwide the economic and societal burden of falls will increase by epidemic proportions in all parts of the world over the next few decades, unless concerted action is taken in a systematic and proactive fashion by policy makers, researchers and practitioners<sup>1</sup>.

It is known that falls in the elderly are common and have a great impact on life and wellbeing. Studies have shown that around 30% of subjects of 65 years plus had a fall during the last 12 months<sup>2</sup> with 10% sustaining severe injuries<sup>3</sup>. Injuries are the fifth most frequent cause of death in the elderly and up to 70% of these injuries were caused by falls<sup>4</sup>. Elderly persons surviving a fall experience significant morbidity: as many as one-third require assistance in their activities of daily living for as long as 6 months<sup>5</sup>. Lasting disabilities are also common as many do not reach pre-fall physical functional states, resulting in increased dependency and (in up to 50%) a transfer to a care facility<sup>4</sup>. Associated as they are with considerable mortality as well as psychological and physical morbidity, these falls lead to increased dependence upon social support and health care services, with high economic impact on the social and health care system<sup>6</sup>. But there is substantial evidence that falls can be prevented when subjects at risk are identified and enrolled in targeted prevention programs.

Several risk factors like sociodemographic variables, physical activity, alcohol consumption, acute and chronic health problems, dizziness, mobility, and medications have been documented repeatedly<sup>7</sup>. Neurological impairments in the elderly are also thought to increase the risk for falls, though evidence for this is mostly derived indirectly from investigations into the causes of falls in the elderly<sup>8</sup>. These studies show that patients admitted to hospitals due to falls frequently also suffer from neurological disorders. Data derived from a multidisciplinary fall consultation survey suggest that in two out of three patients, potentially fall inducing neurological disorders were present, most of them (85%) previously undiagnosed<sup>9</sup>.

There is, however, substantially less known about the risk for falls in patients afflicted with various common neurological diseases. While there is already a substantial amount known about increased risk of falls in the stroke<sup>10</sup>, Parkinson's disease<sup>11</sup> or dementia<sup>12</sup> population, to our knowledge there is only one comparative study investigating falls in patients with of a broad range of neurological diseases. This study by Stolze, however, was conducted on patients with neurological diseases severe enough to require hospital admission<sup>13</sup>. To date little is known about the risk of falling in

1 independent, community dwelling senior citizens afflicted with neurological diseases treatable in  
2 outpatient facilities. Studies targeting this issue so far either did not use a control group or, if they  
3 did, the absence of neurological signs and symptoms in this cohort was not guaranteed.  
4

5 Because falls in community dwelling elderly patients are assumed to be both prevalent and  
6 preventable, neurologists in outpatient settings need a sound base to identify patients with the  
7 highest risk, to reduce not only the number of falls and the suffering they entail, but also overall  
8 health care costs. Our study thus aimed to investigate the risk of falls in elderly patients with  
9 various neurological diseases that are commonly encountered in outpatient facilities. We  
10 hypothesized that even in community dwelling elderly patients, the impact one or more  
11 neurological diseases on top of an already increased propensity for falls is substantial; that patients  
12 with certain diseases like stroke or Parkinson's disease are particularly at risk; and that affliction  
13 with more than one of these high risk diseases increases the risk even further.  
14  
15  
16  
17  
18  
19  
20  
21  
22  
23  
24  
25  
26

## 27 **PARTICIPANTS AND METHODS**

### 28 **Setting**

29 Data were collected at the general outpatient department of the Department of Neurology of the  
30 University Hospital in Graz, Austria. As visits to the outpatient department do not require specialist  
31 referrals, the disease spectrum largely resembles that seen by community based neurologists.  
32  
33  
34  
35  
36  
37  
38  
39

### 40 **Selection of participants and baseline examination**

41 Physically independent community dwelling patients treated in our general neurological outpatient  
42 clinic aged 60 years and over were included in the study. Patients were all seen consecutively by  
43 one and the same consultant (CNH) in the period from July 2007 to May 2008, what also explains  
44 the study size. Severely disabled patients who were no longer able to walk unaided or were in poor  
45 general condition, be it for reasons of neurological or other medical disease, were excluded from the  
46 study. Cognitive impairment to an extent that an interview would no longer yield reliable results  
47 (MMSE $\leq$ 12), was also a cause for exclusion. All neurological patients included underwent a full  
48 neurological workup with an extensive history to detect signs of past and present neurological  
49 disorders. For the sake of uniformity, both the workup and history were structured and followed the  
50 study protocol.  
51  
52  
53  
54  
55  
56  
57

58 As healthy controls, individuals from the general public out of the same catchment area as cases  
59  
60

1 were enrolled. They were recruited among friends and acquaintances of the author and his co-  
2 workers who were aged 60+ and without any history of neurological disorders or other disabling  
3 medical conditions like heart failure, chronic obstructive pulmonary disease or rheumatoid arthritis  
4 severe enough to cause limitation of ordinary physical activity. Examination and history were as per  
5 study protocol, whereby special emphasis was placed on identifying symptoms and signs of  
6 Parkinson's disease, peripheral neuropathy, stroke or epilepsy, as well as minor sensory-motor  
7 deficits and gait or balance impairments. Controls with even subtle neurological pathologies were  
8 excluded. Although not routinely screened for cognitive deficits, obvious signs of or a known  
9 diagnosis of dementia or even of mild cognitive impairment was a reason for exclusion.

10 A telephone follow-up was scheduled 12 months after the baseline outpatient visit; it was carried  
11 out by one of two examiners (AP, MG) following a predefined format and only subjects who had  
12 given verbal informed consent at the start of the telephone contact were interviewed.

13 The first section of the interview questionnaire covered demographic data like age and place of  
14 residence. The residence category had 5 subsections on size and traffic infrastructure, with group 1  
15 being the state capital and group 5 a small town in the periphery. Next were specific questions on  
16 fall frequency, physical disability, depression and confidence in one's own sense of balance. The  
17 final section dealt with risk situations (like when using public transport) and general mobility  
18 issues, whereby the latter are not included in this publication.

19 The survey, including all details concerning the selection process, was approved by the Ethics  
20 Committee of the Medical University Graz.

### 21 **Frequency of falls**

22 In the main section of the questionnaire patients and healthy controls were asked whether they had  
23 had a fall during the past 12 months and, if yes, how many times they had fallen. The yearly fall  
24 incidence was graded according to the fall frequency index into 5 categories. Category one means  
25 1-2 falls, category two 3-5, three 6-10, four 11-20, and five more than 20 falls.

### 26 **Disability**

27 The Barthel Index <sup>14</sup>, a disability scale with scores from 0 (completely dependent) to 100  
28 (completely independent) was used to evaluate the functional status of all neurological patients.

29 Parkinson patients were also rated according to the the Schwab and England Scale and Part II of the  
30 Unified Parkinson's Disease Rating Scale (UPDRS) <sup>15</sup>.

### 31 **Depression**

32 To determine the grade of depression, the Allgemeine Depressionsskala Kurzform (ADS-K) <sup>16</sup>, the  
33 German short form of the Center of Epidemiological Studies Depression Scale (CES-D) <sup>17</sup> was  
34

1 used. It is known to be particularly well suited for the use in the elderly and in patients with certain  
2 neurological disabilities<sup>18</sup>.  
3  
4

### 5 6 7 **Balance Confidence**

8  
9 We also rated the patients' confidence in their own sense of balance with the Activities-Specific  
10 Balance Confidence Scale (ABC -6 scale)<sup>19</sup>. Participants judged their confidence in performing  
11 specific activities without loss of balance or being unsteady on a scale ranging from 0% (no  
12 confidence at all) to 100% (completely confident). The total score was then computed as an average  
13 of the subscores.  
14  
15  
16  
17

### 18 19 **Statistical analysis**

20  
21 The primary outcomes was falls, based on participant recall over the prior 12 months. Falls were  
22 defined according to the WHO definition<sup>1</sup> as an event which results in a person coming to rest  
23 inadvertently on the ground or floor or other lower level irrespective of cause, thus including e.g.  
24 falls from epileptic seizures. The one-year incidence of falls was calculated for both healthy elderly  
25 individuals and the whole sample of neurological patients. Further calculations were done for  
26 subsamples of 13 neurological disorders with the highest prevalence ( $n \geq 7$ ). The diagnoses were  
27 based on the ICD-10 system for classification of diseases. The means and standard deviations were  
28 calculated for numerical values like the rating scale scores. For the identification of fall related risk  
29 factors, correlations (Kendall's  $\tau$ -B), and for the individual neurological disorders, odds ratios were  
30 computed ( $\alpha$ -level of significance  $p < 0.05$ ). Differences between neurological patients and healthy  
31 controls were tested with the Mann-Whitney U test or the chi-square test ( $\alpha$ -levels of significance  $p$   
32  $< 0.05$ ). To insure comparability of cohorts we formed age- and gender-matched pairs of patients  
33 and control subjects. For the matching process we used alphabetical lists of names of male and  
34 female neurological patients and likewise of healthy controls, sorted by age. Then working down  
35 the list we searched manually to find for each neurological patient one control subject of the same  
36 age. If no match was found then we looked for a control that was one year younger, then one year  
37 older, then two years and finally three years younger respectively older. Only complete sets of data  
38 were included in the calculations and no approximates to replace missing values were computed.  
39 Calculations were performed with SPSS<sup>®</sup> statistical software PASW statistics 18. Potential bias  
40 and how it was addressed will be dealt with in the section on limitations.  
41  
42  
43  
44  
45  
46  
47  
48  
49  
50  
51  
52  
53  
54  
55  
56  
57

## 58 **RESULTS**

1  
2  
3 During a period of 10 months we recruited 298 mobile neurological outpatients and 214 healthy  
4 controls aged 60 years and over. In the group of healthy controls 21 patients initially recruited could  
5 not be included in the study due to neurological symptoms and signs, or a history of a neurological  
6 disorder. In the group of neurological patients another 70 patients had to be excluded from the study  
7 because at the time of the interview they (n=10) or their caregiver (n=6) requested exclusion, the  
8 telephone number on record had been disconnected (n=24), all attempts to contact them failed  
9 (n=11), they had become so disabled that they could no longer participate in the survey (n=10), they  
10 had died (n=4), or for other reasons (n=5).

11  
12  
13  
14  
15  
16  
17  
18  
19  
20  
21  
22  
23  
24  
25  
26  
27  
28  
29  
30  
31  
32  
33  
34  
35  
36  
37  
38  
39  
40  
41  
42  
43  
44  
45  
46  
47  
48  
49  
50  
51  
52  
53  
54  
55  
56  
57  
58  
59  
60  
Prior to recruitment, twenty patients were excluded because of inability to walk unaided and one  
due to severe dementia. Of those that met inclusion criteria five rejected enrolment and six other  
patients could not be enrolled due to inadequate language skills (n=1), severe aphasia (n=1), or  
severe presbycusis (n=4).

The statistical analysis thus covered 228 neurological outpatients (aged  $74.5 \pm 7.8$ ; 61% women)  
and 193 healthy controls. The matching process led to 171 pairs of neurological patients and  
healthy controls, 101 women and 70 men in each group, aged 72.0 and 72.2 years, respectively. The  
details of these subjects are summarized in Table 1.

### **Incidence of falls in neurological patients and healthy controls**

One hundred and six (46.5%) neurological patients but only 31 (16.1%) healthy controls had fallen  
at least once ( $\text{Chi}^2=43.4$ ;  $p < 0.001$ ) during this one-year period. Out of 106 neurological patients  
experiencing falls, 76 (71.7%) fell once or twice, 22 (20.8%) three to five times, three (2.8%) six to  
nine times, three (2.8%) 11-20 times and two (1.9%) more than 20 times. In the group of healthy  
controls, out of 31 individuals with a history of falls, 24 (77.4%) fell once or twice, and seven  
(22.6%) three to five times, but none more often than that. In the matched cohorts as well falls were  
more frequent in neurological patients (42.1%) than in healthy controls (16.9%) ( $\text{Chi}^2=26.3$ ;  
 $p < 0.001$ ). (Table 1)

The mean age of individuals with a history of falls as compared to those without was higher both in  
the neurologically affected (fallers:  $76.7 \pm 7.6$  vs. nonfallers:  $72.6 \pm 7.5$ ;  $p < 0.001$ ) and in healthy  
controls (fallers:  $73.3 \pm 6.5$  vs. nonfallers:  $71.0 \pm 6.9$ ;  $p = 0.040$ ). In the group of neurological  
patients, 75 of 106 fallers (71%) were female, but only 31 (29%) were male ( $\text{Chi}^2=8.675$ ;  $p = 0.003$ ).



1 Similarly, in the group of healthy controls a higher percentage of fallers was female, with 23 out of  
2 31 (74%), but this did not reach significance ( $\text{Chi}^2=1.915$ ;  $p=0.166$ ).

3  
4  
5 The occurrence of falls in neurological patients was independent of where they lived. For healthy  
6 controls, however, their place of residence had an influence, in that subjects living in more rural  
7 environments were more prone to falls ( $\Gamma\text{-B}=0.217$ ;  $p<0.001$ ).

8  
9  
10 Multiple falls occurred particularly in patients with peripheral neuropathy (43%), peripheral nerve  
11 lesion (43%), dementia (33%), Parkinson's disease (30%), stroke (30%) and vertebral pain (30%).  
12 The average fall frequency index in this group of five diseases ranged from 1.63 (peripheral  
13 neuropathy) to 1.33 (dementia). The proportion of fallers in each index category is shown for all  
14 these diseases in Fig. 1.  
15  
16  
17  
18  
19  
20  
21  
22

### 23 **Risk factors for falls in neurological patients**

24 The type of neurological disease the patient was afflicted with influenced the proportion of fallers in  
25 that patients post stroke (89%), with Parkinson's disease (77%), dementia (60%) and epilepsy (57%)  
26 had the highest frequency of falls. The lowest likelihood of falls was found in patients suffering  
27 from tinnitus (30%) and headache (28%), but was still higher than that of the average healthy  
28 control (16.1%). (Fig. 2)  
29  
30  
31  
32  
33  
34  
35

36 The respective odds ratios are shown in table 2 and range from 40.1 (stroke) to 2.1 (headache) and  
37 the relative risk of falling ranges between 5.5 for stroke patients and 1.8 for patients with headache.

38 No specific combination of two or three neurological diseases characterized by substantial gait or  
39 balance impairment but any accumulation of several neurological diseases regardless of their  
40 influence on gait or balance was able to cause a significant raise in falls ( $\Gamma\text{-B}=0.303$ ;  $p<0.001$ ).

41 Other risk factors for falls in neurological patients were female gender ( $\Gamma\text{-B}=0.195$ ;  $p=0.003$ ),  
42 higher age ( $\Gamma\text{-B}=0.217$ ;  $p<0.001$ ), higher disability or disease severity as measured by the Barthel  
43 Index ( $\Gamma\text{-B}=-0.232$ ;  $p<0.001$ ). Higher disability scores in Parkinson patients expressed by higher  
44 UPDRS II (activities of daily living) scores ( $\Gamma\text{-B}=-0.238$ ;  $p=0.062$ ) and higher Schwab & England  
45 scores ( $\Gamma\text{-B}=-0.235$ ;  $p=0.070$ ) resulted in a trend toward more frequent falls. Severity of depression  
46 as reflected by a higher ADS score ( $\Gamma\text{-B}=0.329$ ;  $p<0.001$ ) and low balance confidence reflected by  
47 lower ABC scores ( $\Gamma\text{-B}=-0.384$ ;  $p<0.001$ ) were also identified as risk factors (Fig. 3).  
48  
49  
50  
51  
52  
53  
54  
55  
56  
57  
58  
59  
60

## DISCUSSION

### Incidence of falling

Our study suggests that even in patients mildly to moderately affected by neurological impairments the incidence of falls was three times higher than in subjects without any neurological symptoms or signs. To our knowledge this is the first survey conducted on elderly neurological outpatients and controls proven to be without neurological impairments, but the extent of this increased relative risk in neurological patients was unexpected, and resulted from low incidence figures in the group of controls and particularly high figures in the patient group.

In our group of healthy controls the 12-month incidence (16.1 %) was considerably lower than in previous population based data serving as a reference for previous studies<sup>20</sup>. Literature suggests that a third to one half of the community dwelling population of 60+ experience falls each year. For a group of 1762 subjects 60+ years of age, Lord reported a yearly incidence rate of falls of 28%<sup>21</sup>. In individuals of 65 years and older Prudham found in his survey conducted on 2793 individuals that 28% experienced one or more falls in the last year<sup>22</sup>. In O'Loughlin's group of 409 it was 29%<sup>7</sup>, in Campbell's group of 533, 33%<sup>23</sup>, and in Blake's group of 1042, 35%.<sup>24</sup> Luukinen's group of 833 individuals aged 70+ showed a 30% annual rate of falls<sup>3</sup> and Tinetti's group of 336 aged 75+ showed a rate of 32%<sup>25</sup>. For the very old, Campbell found in a community-based prospective study based on 761 subjects that half of those age 80 years and over have a fall every year<sup>26</sup>. This incidence rate, twice or three times that of our figures, did not surprise us. Population-based data of elderly individuals inevitably include a considerable number of patients suffering from neurological diseases or other forms of gait or balance problems. Many of these neurological disorders like stroke, Alzheimer's disease or Parkinson's disease are typical diseases of the elderly and others like epilepsy or traumatic brain injury also have a second peak in higher age<sup>27</sup>. This shows that it can be of advantage, when studying groups of elderly patients, to have a truly healthy control group, as in our survey.

Our study also shows that half of all ambulatory neurological patients had had at least one fall within the last 12 month. As to our knowledge this is the first survey of neurological outpatients, the lack of comparative data gave us no choice but to relate our findings to Stolze's data on neurological inpatients showing, much to our surprise, a falling incidence as low as 34%<sup>13</sup>. One would have assumed that Stolze's patients, who required inpatient treatment for their neurological conditions, would be more severely disabled and thus more prone to falls than outpatients. It also appears contradictory our findings that indicators of disease severity like the Barthel index and the UPDRS II correlated positively with the incidence of falls. Several studies further support this concept by stat-

1 ing that the more severely affected patients are, the higher the falling risk<sup>28</sup>. However, we have rea-  
2 sons to believe that the correlation is not linear throughout all grades of disability but rather resem-  
3 bles an inverse U-shaped curve. We think that the initial propensity for falls increases with higher  
4 disability only up to a certain point. Then, as patients become more cautious and use all kind of  
5 supports, it plateaus and even decreases. When patients become so disabled that they are finally  
6 bedridden, the risk approaches zero with the lack of opportunities to fall. Our values so would be  
7 located on the inclining leg close to the peak and Stolze's further down on the declining leg. Since  
8 this concept has yet only been proposed for PD<sup>29</sup> but not for other neurological conditions, further  
9 studies directly comparing the risk of falling in neurological inpatients and outpatients of various  
10 grades of disability are needed to support this assumption.

11 Considering recurrent falls we found that in the group of neurological patients 13.2 % fell three or  
12 more times per year, compared to 3.6% in the group of healthy controls. This is in keeping with the  
13 results of studies investigating recurrent falls, where figures of 8% for three or more falls in ran-  
14 domly selected community dwelling elderly individuals are given<sup>30</sup> and 10% for community based  
15 seniors using home care services<sup>31</sup>. In Stolze's cohort of inpatients the value of 21% for recurrent  
16 falls was higher and can probably be explained by methodological differences. Stolze's category of  
17 recurrent falls already includes patients who had fallen twice, unlike our and other studies<sup>30,31</sup> that  
18 include patients only after more than three falls.

### 32 **Risk factors contributing to falls**

33 We found out that the type of neurological disease afflicting a patient determines the potential risk  
34 factor for falls. Here, two diseases stood out: stroke patients were 6 times (89%) and Parkinson pa-  
35 tients 5 times (71%) more likely to suffer falls than healthy controls (16%). This is in keeping with  
36 previous community based studies showing a high likelihood for falls in stroke patients with a range  
37 of 51-73%<sup>10,20,32</sup> and in Parkinson's patients with a range of 38 – 87%<sup>33-39</sup>. This was followed by  
38 a group of neurological diseases with an almost 4 times higher likelihood (55-60%) of falls, consist-  
39 ing of dementia, epilepsy, other movement disorders, other vascular diseases and peripheral neu-  
40 ropathy. These diseases are also known to carry a high risk for falls, with an annual fall rate of 60-  
41 80%<sup>12,40</sup> in Alzheimer patients and 55-65%<sup>41-43</sup> in patients with peripheral neuropathy. The only  
42 study conducted on falls in elderly patients suffering from epilepsy is one on care facility residents,  
43 providing a 5-year fall incidence of 83%<sup>44</sup>. In our sample peripheral neuropathy also proved to be a  
44 risk factor for recurrent falls, but most likely significance was not reached due to the small sample  
45 size (p=0.061). Confirmative data also obtained from small cohorts revealed that multiple falls oc-  
46 curred in 10 out of 25 (40%) neuropathy patients<sup>43</sup> and another 13 out of 20 neuropathy patients  
47 (65%) had a propensity for multiple falls for an average of 5.8 falls per year<sup>41</sup>. New and unexpected  
48  
49  
50  
51  
52  
53  
54  
55  
56  
57  
58  
59  
60

1 was the fact that even patients suffering from neurological diseases with no direct influence on gait  
2 or balance like headache (28%) had almost twice as many falls as the average healthy control  
3 (16.1%). Also new is that in contrast to all the above cited data derived from studies on patients  
4 with only one neurological disorder, our survey provides comparative values for several neurologi-  
5 cal diseases of elderly ambulatory neurological patients for the first time, allowing a direct compari-  
6 son between these disorders and a ranking according to the risk of falling.  
7

8 But our findings further suggest that not only the type of neurological conditions, but also the num-  
9 ber of neurological diseases a patient was suffering from, no matter whether they had an influence  
10 on gait or balance, correlated with the risk of falling. This came as a surprise as we assumed that  
11 only accumulations of neurological deficits relating to gait and balance would influence the risk for  
12 falls. Although there were no published studies on the influence of neurological diseases, it is  
13 known that persons with an impaired sense of balance have an disproportionately higher risk for  
14 falls when they acquire an additional new disease or condition, even if it is one that seems minor or  
15 not related to falling per se. Tinetti was able to demonstrate that the number of chronic diseases a  
16 patient was suffering from was highly predicative of a risk to fall, better even than a mobility score.  
17 She concluded that falling appears to result from an accumulated effect of multiple specific disabili-  
18 ties<sup>45</sup>. This would be in keeping with our other findings, that old age in combination with any neu-  
19 rological disease increases the risk of falling above that of healthy controls, even if it is a disease  
20 like headache. Also in accordance with this we found that a higher rate of depression, as reflected  
21 by a higher ADS-score, also increased the risk for falls. An alternative explanation for this could be  
22 that depressive thoughts are frequently combined with negative conceptions of one's own sense of  
23 balance, which was found to be a prominent risk factor for falls in our and previous other studies<sup>46</sup>.  
24 That higher age would be a predictive factor for falls in neurological patients replicates previous  
25 findings<sup>13</sup> and is easy to explain: old age is often associated with greater frailty and eventually  
26 frailty with less confidence in one's sense of balance and a higher incidence of falls<sup>46</sup>. That females  
27 are more prone to falls than males has often been stated before<sup>13</sup> and has previously been explained  
28 by a fear of falling and a loss of confidence – both independent risk factors for falls - being more  
29 prominent in women<sup>6</sup>.

## 50 51 52 **LIMITATIONS**

53  
54  
55 We also faced several limitations in our study. First and most importantly, like most other surveys  
56 dealing with falls, we faced the problem that the number of falls are likely to be underreported.  
57 Elderly subjects often try to downplay problems regarding their mobility for fear of having their  
58  
59  
60

1  
2  
3  
4  
5  
6  
7  
8  
9  
10  
11  
12  
13  
14  
autonomy restricted. While this is in general typically found in the healthy elderly, it might be even more prominent in patients with disabilities. But even remembering these events might pose a problem in some of the patients with central degenerative diseases and this might have been a relevant factor in our study, even though we excluded patients with severe dementia. The risk for falls in neurological patients might therefore be greater than shown in any results. Future prospective studies could minimize this problem by using patients diaries according to established guidelines for reporting falls <sup>47</sup> possibly even in combination with wearable miniaturized electronic devices apt to objectively detect and monitor falls <sup>48</sup>.

15  
16  
17  
18  
19  
20  
21  
22  
23  
24  
Secondly, the large drop out rate of 23% from neurological assessment to interview, not containing the 3,6% that had to be excluded prior to recruitment due to inability or unwillingness to participate could have lead to further underestimating the number of patients with falls. However, since these patients did not obviously differ in their baseline characteristics, we assume this problem to be minimal.

25  
26  
27  
28  
29  
30  
31  
32  
33  
34  
35  
36  
37  
38  
39  
40  
41  
42  
43  
44  
Then, we would also like to address the issue of small sample sizes in subgroups of neurological diseases. Some of the groups like vascular diseases, movement disorders, vertebral pain and peripheral neuropathy are adequately sized, and even outnumber subjects of single disease studies like those on peripheral neuropathy <sup>41, 43</sup>. Others, particularly the dementia group with only seven patients, is, due to the exclusion of the more affected, quite small and allows only limited extrapolation. Nevertheless it is remarkable that even here the analysis of difference reached levels of significance.

## 45 46 47 48 49 50 51 52 53 54 55 56 57 58 59 60 CONCLUSION

It can be said that we managed to show, apparently for the first time, that even among ambulatory neurological outpatients, falls are alarmingly frequent. The aetiology of falls is multi-factorial, but the connection between falls and disturbances of the sensorimotor system frequently found in neurological diseases in elderly patients is of great importance. Our findings revealed that even neurological diseases not directly connected with gait and balance carry an astonishingly high risk for falls. Medical practitioners, allied health professionals and carers should therefore be aware that their patients are at high risk for falls, as any neurological deficit increases this risk, even more so if a combination of factors is present. Of course the risk has to be evaluated individually, but patients with central

1 diseases like stroke, Parkinson's disease, dementia and epilepsy, and for repeated falls also  
2 patients with peripheral neurological disorders, require special attention. Greater disability,  
3 higher age, female gender, depression and low confidence in the sense of balance are  
4 additional contributory factors that have to be taken into account in this process. For patients  
5 with several of these factors, targeted prevention programs should be implemented.  
6

7  
8 However, although they have been shown to generally reduce falls and injuries in the  
9 community dwelling elderly<sup>49</sup>, there is but inconclusive evidence for patients following  
10 stroke<sup>50</sup> and with PD<sup>51,52</sup> and even more scanty information for patients with other  
11 neurological diseases. Therefore further larger scale multicenter neuro-geriatric surveys  
12 with larger sample sizes for neurological subgroups should be performed not only to confirm  
13 our observations but to acquire more extensive knowledge of the effectiveness of preventive  
14 measures in patient cohorts with various neurological conditions and different degrees of  
15 disability. These studies should also include more objective monitoring systems and include  
16 further potential risk factors like medication and fear of falling.  
17  
18  
19  
20  
21  
22  
23  
24

## 25 26 27 NOTES

28  
29 Acknowledgements: We acknowledge the study participants for their help and participation.  
30

31 Funding and Competing interests: All authors have completed the Unified Competing Interest form  
32 and declare: no support from any organisation for the submitted work; no financial relationships  
33 with any organisations that might have an interest in the submitted work in the previous three years;  
34 and no other relationships or activities that could appear to have influenced the submitted work.  
35 Thus, neither the study nor the salary of participants was funded by any third party.  
36  
37

38 Contributorship Statement: B. H.: drafting/revising the manuscript, study concept or design, analy-  
39 sis or interpretation of data; A. P.: analysis or interpretation of data, acquisition of data of patients  
40 and controls, study concept or design; M. G.: analysis or interpretation of data, acquisition of data  
41 of patients and controls, study concept or design; A.H. acquisition of data of patients and controls;  
42 T. G.: acquisition of data, study concept or design, G. I.: critical revision of the manuscript for im-  
43 portant intellectual content; E. H.: statistical analysis , analysis or interpretation of data, study con-  
44 cept or design; G.I.: drafting/revising the manuscript, study concept or design, critical revision of  
45 the manuscript for important intellectual content; F. F.: drafting/revising the manuscript, study con-  
46 cept or design, critical revision of the manuscript for important intellectual content; C. N. H.: draft-  
47 ing/revising the manuscript, study concept or design, acquisition of data, study supervision.  
48  
49  
50  
51  
52  
53

54 Ethical approval: This study was approved by the Ethics Committee of the Medical University Graz  
55

56 Patient consent: obtained  
57  
58  
59  
60

## REFERENCES

1. WHO. WHO global report on falls prevention in older age. Geneva, Switzerland: World Health Organization, 2007.
2. Gillespie LD. Preventing falls in older people: the story of a Cochrane review. *Cochrane database of systematic reviews* 2013;2:ED000053.
3. Luukinen H, Koski K, Hiltunen L, Kivela SL. Incidence rate of falls in an aged population in northern Finland. *Journal of clinical epidemiology* 1994;47:843-850.
4. Sattin RW, Lambert Huber DA, DeVito CA, et al. The incidence of fall injury events among the elderly in a defined population. *American journal of epidemiology* 1990;131:1028-1037.
5. Sleet DA, Moffett DB, Stevens J. CDC's research portfolio in older adult fall prevention: a review of progress, 1985-2005, and future research directions. *Journal of safety research* 2008;39:259-267.
6. Collerton J, Kingston A, Bond J, et al. The personal and health service impact of falls in 85 year olds: cross-sectional findings from the Newcastle 85+ cohort study. *PloS one* 2012;7:e33078.
7. O'Loughlin JL, Robitaille Y, Boivin JF, Suissa S. Incidence of and risk factors for falls and injurious falls among the community-dwelling elderly. *American journal of epidemiology* 1993;137:342-354.
8. Deandrea S, Lucenteforte E, Bravi F, Foschi R, La Vecchia C, Negri E. Risk factors for falls in community-dwelling older people: a systematic review and meta-analysis. *Epidemiology* 2010;21:658-668.
9. Guillochon A, Crinquette C, Gaxatte C, et al. [Neurological diseases detected in the Lille Multidisciplinary Falls Consultation]. *Revue neurologique* 2010;166:235-241.
10. Lamb SE, Ferrucci L, Volapto S, et al. Risk factors for falling in home-dwelling older women with stroke: the Women's Health and Aging Study. *Stroke; a journal of cerebral circulation* 2003;34:494-501.
11. Paul SS, Canning CG, Sherrington C, Lord SR, Close JC, Fung VS. Three simple clinical tests to accurately predict falls in people with Parkinson's disease. *Movement disorders : official journal of the Movement Disorder Society* 2013;28:655-662.
12. Horikawa E, Matsui T, Arai H, Seki T, Iwasaki K, Sasaki H. Risk of falls in Alzheimer's disease: a prospective study. *Internal medicine* 2005;44:717-721.
13. Stolze H, Klebe S, Zechlin C, Baecker C, Friege L, Deuschl G. Falls in frequent neurological diseases--prevalence, risk factors and aetiology. *J Neurol* 2004;251:79-84.
14. Mahoney FI, Barthel DW. Functional Evaluation: The Barthel Index. *Maryland state medical journal* 1965;14:61-65.
15. Fahn S ER, ed. Unified Parkinsons Disease Rating Scale. Florham Park: Macmillan Healthcare Information, 1987.
16. Hautzinger MB, Maya. Allgemeine Depressions Skala, Manual. Göttingen: Beltz Test GmbH, 1993.
17. Radloff LS. The CES-D Scale. *Applied Psychological Measurement* 1977;1:385-401.
18. Schrag A, Barone P, Brown RG, et al. Depression rating scales in Parkinson's disease: critique and recommendations. *Movement disorders : official journal of the Movement Disorder Society* 2007;22:1077-1092.
19. Peretz C, Herman T, Hausdorff JM, Giladi N. Assessing fear of falling: Can a short version of the Activities-specific Balance Confidence scale be useful? *Movement disorders : official journal of the Movement Disorder Society* 2006;21:2101-2105.
20. Forster A, Young J. Incidence and consequences of falls due to stroke: a systematic inquiry. *Bmj* 1995;311:83-86.

- 1 21. Lord SR, Sambrook PN, Gilbert C, et al. Postural stability, falls and fractures in the elderly:  
2 results from the Dubbo Osteoporosis Epidemiology Study. *The Medical journal of Australia*  
3 1994;160:684-685, 688-691.
- 4 22. Prudham D, Evans JG. Factors associated with falls in the elderly: a community study. *Age*  
5 and ageing 1981;10:141-146.
- 6 23. Campbell AJ, Borrie MJ, Spears GF, Jackson SL, Brown JS, Fitzgerald JL. Circumstances  
7 and consequences of falls experienced by a community population 70 years and over during a  
8 prospective study. *Age and ageing* 1990;19:136-141.
- 9 24. Blake AJ, Morgan K, Bendall MJ, et al. Falls by elderly people at home: prevalence and  
10 associated factors. *Age and ageing* 1988;17:365-372.
- 11 25. Tinetti ME, Speechley M, Ginter SF. Risk factors for falls among elderly persons living in  
12 the community. *The New England journal of medicine* 1988;319:1701-1707.
- 13 26. Campbell AJ, Borrie MJ, Spears GF. Risk factors for falls in a community-based  
14 prospective study of people 70 years and older. *Journal of gerontology* 1989;44:M112-117.
- 15 27. Hirtz D, Thurman DJ, Gwinn-Hardy K, Mohamed M, Chaudhuri AR, Zalutsky R. How  
16 common are the "common" neurologic disorders? *Neurology* 2007;68:326-337.
- 17 28. Schmid AA, Kapoor JR, Dallas M, Bravata DM. Association between stroke severity and  
18 fall risk among stroke patients. *Neuroepidemiology*;34:158-162.
- 19 29. Bloem BR, van Vugt JP, Beckley DJ. Postural instability and falls in Parkinson's disease.  
20 *Advances in neurology* 2001;87:209-223.
- 21 30. Soriano TA, DeCherrie LV, Thomas DC. Falls in the community-dwelling older adult: a  
22 review for primary-care providers. *Clinical interventions in aging* 2007;2:545-554.
- 23 31. Fletcher PC, Hirdes JP. Risk factors for falling among community-based seniors using home  
24 care services. *The journals of gerontology Series A, Biological sciences and medical sciences*  
25 2002;57:M504-510.
- 26 32. Yates JS, Lai SM, Duncan PW, Studenski S. Falls in community-dwelling stroke survivors:  
27 an accumulated impairments model. *Journal of rehabilitation research and development*  
28 2002;39:385-394.
- 29 33. Balash Y, Peretz C, Leibovich G, Herman T, Hausdorff JM, Giladi N. Falls in outpatients  
30 with Parkinson's disease: frequency, impact and identifying factors. *Journal of neurology*  
31 2005;252:1310-1315.
- 32 34. Koller WC, Glatt S, Vetere-Overfield B, Hassanein R. Falls and Parkinson's disease.  
33 *Clinical neuropharmacology* 1989;12:98-105.
- 34 35. Ashburn A, Stack E, Pickering RM, Ward CD. Predicting fallers in a community-based  
35 sample of people with Parkinson's disease. *Gerontology* 2001;47:277-281.
- 36 36. Gray P, Hildebrand K. Fall risk factors in Parkinson's disease. *The Journal of neuroscience*  
37 nursing : journal of the American Association of Neuroscience Nurses 2000;32:222-228.
- 38 37. Wood BH, Bilclough JA, Bowron A, Walker RW. Incidence and prediction of falls in  
39 Parkinson's disease: a prospective multidisciplinary study. *Journal of neurology, neurosurgery, and*  
40 *psychiatry* 2002;72:721-725.
- 41 38. Pickering RM, Grimbergen YA, Rigney U, et al. A meta-analysis of six prospective studies  
42 of falling in Parkinson's disease. *Movement disorders : official journal of the Movement Disorder*  
43 *Society* 2007;22:1892-1900.
- 44 39. Hely MA, Reid WG, Adena MA, Halliday GM, Morris JG. The Sydney multicenter study of  
45 Parkinson's disease: the inevitability of dementia at 20 years. *Movement disorders : official journal*  
46 *of the Movement Disorder Society* 2008;23:837-844.
- 47 40. Ryan JJ, McCloy C, Rundquist P, Srinivasan V, Laird R. Fall risk assessment among older  
48 adults with mild Alzheimer disease. *J Geriatr Phys Ther*;34:19-27.
- 49 41. DeMott TK, Richardson JK, Thies SB, Ashton-Miller JA. Falls and gait characteristics  
50 among older persons with peripheral neuropathy. *American journal of physical medicine &*  
51 *rehabilitation / Association of Academic Physiatrists* 2007;86:125-132.
- 52  
53  
54  
55  
56  
57  
58  
59  
60



- 1
  - 2
  - 3
  - 4
  - 5
  - 6
  - 7
  - 8
  - 9
  - 10
  - 11
  - 12
  - 13
  - 14
  - 15
  - 16
  - 17
  - 18
  - 19
  - 20
  - 21
  - 22
  - 23
  - 24
  - 25
  - 26
  - 27
  - 28
  - 29
  - 30
  - 31
  - 32
  - 33
  - 34
  - 35
  - 36
  - 37
  - 38
  - 39
  - 40
  - 41
  - 42
  - 43
  - 44
  - 45
  - 46
  - 47
  - 48
  - 49
  - 50
  - 51
  - 52
  - 53
  - 54
  - 55
  - 56
  - 57
  - 58
  - 59
  - 60
42. Richardson JK, Ching C, Hurvitz EA. The relationship between electromyographically documented peripheral neuropathy and falls. *Journal of the American Geriatrics Society* 1992;40:1008-1012.
43. Richardson JK, Hurvitz EA. Peripheral neuropathy: a true risk factor for falls. *The journals of gerontology Series A, Biological sciences and medical sciences* 1995;50:M211-215.
44. Flierl-Hecht A, Pfafflin M, May TW, Kohlschutter S, Hensel B, Stefan H. [Is epilepsy in the elderly overlooked? An investigation in a home for the aged]. *Der Nervenarzt* 2003;74:691-698.
45. Tinetti ME, Williams TF, Mayewski R. Fall risk index for elderly patients based on number of chronic disabilities. *The American journal of medicine* 1986;80:429-434.
46. Kose N, Cuvalci S, Ekici G, Otman AS, Karakaya MG. The risk factors of fall and their correlation with balance, depression, cognitive impairment and mobility skills in elderly nursing home residents. *Saudi medical journal* 2005;26:978-981.
47. Lamb SE, Jorstad-Stein EC, Hauer K, Becker C, Prevention of Falls Network E, Outcomes Consensus G. Development of a common outcome data set for fall injury prevention trials: the Prevention of Falls Network Europe consensus. *Journal of the American Geriatrics Society* 2005;53:1618-1622.
48. Howcroft J, Kofman J, Lemaire ED. Review of fall risk assessment in geriatric populations using inertial sensors. *Journal of neuroengineering and rehabilitation* 2013;10:91.
49. Oliver D, Connelly JB, Victor CR, et al. Strategies to prevent falls and fractures in hospitals and care homes and effect of cognitive impairment: systematic review and meta-analyses. *Bmj* 2007;334:82.
50. Verheyden GS, Weerdesteijn V, Pickering RM, et al. Interventions for preventing falls in people after stroke. *Cochrane database of systematic reviews* 2013;5:CD008728.
51. Goodwin VA, Richards SH, Henley W, Ewings P, Taylor AH, Campbell JL. An exercise intervention to prevent falls in people with Parkinson's disease: a pragmatic randomised controlled trial. *Journal of neurology, neurosurgery, and psychiatry* 2011;82:1232-1238.
52. Li F, Harmer P, Fitzgerald K, et al. Tai chi and postural stability in patients with Parkinson's disease. *The New England journal of medicine* 2012;366:511-519.

## TABLES AND FIGURES

**Table 1: Neurological patients and healthy controls: General demographics and fall frequency**

|                                   | Total               |                    |         | Matched pairs       |                    |         |
|-----------------------------------|---------------------|--------------------|---------|---------------------|--------------------|---------|
|                                   | Patients<br>(n=228) | Healthy<br>(n=193) | p-value | Patients<br>(n=171) | Healthy<br>(n=171) | p-value |
| <b>Total</b>                      |                     |                    |         |                     |                    |         |
| Age                               | 74.5±7.8            | 71.4±6.8           | 0.000   | 72.2±7.0            | 72.0±6.9           | 0.839   |
| Gender (f in %)                   | 61%                 | 63%                | 0.572   | 59%                 | 59%                | 1.000   |
| Region (Residential Index: mean)  | 2.53                | 2.21               | 0.021   | 2.66                | 2.22               | 0.004   |
| Disability (Bartelindex: mean)    | 98.20               | n.d.               |         | 98.24               | n.d.               |         |
| Balance (ABC-score: mean)         | 73.19               | n.d.               |         | 83.39               | n.d.               |         |
| Depression (ADS-K-score: mean)    | 7.2                 | n.d.               |         | 6.9                 | n.d.               |         |
|                                   |                     |                    |         |                     |                    |         |
| <b>Fallers</b>                    |                     |                    |         |                     |                    |         |
| Falls (n (%))                     | 46.5%               | 16.1%              | 0.000   | 42.1%               | 16.9%              | 0.000   |
| Multiple Falls (>2 falls) (n (%)) | 28.3%               | 22.6%              | 0.528   | 26.4%               | 24.1%              | 0.815   |
| Fall frequency Index (in fallers) | 1.42±0.8            | 1.23±0.4           | 0.078   | 1.44±0.9            | 1.24±0.4           | 0.14    |

**Percentage of Fallers in various Neurological Diseases according to FFI Categories**

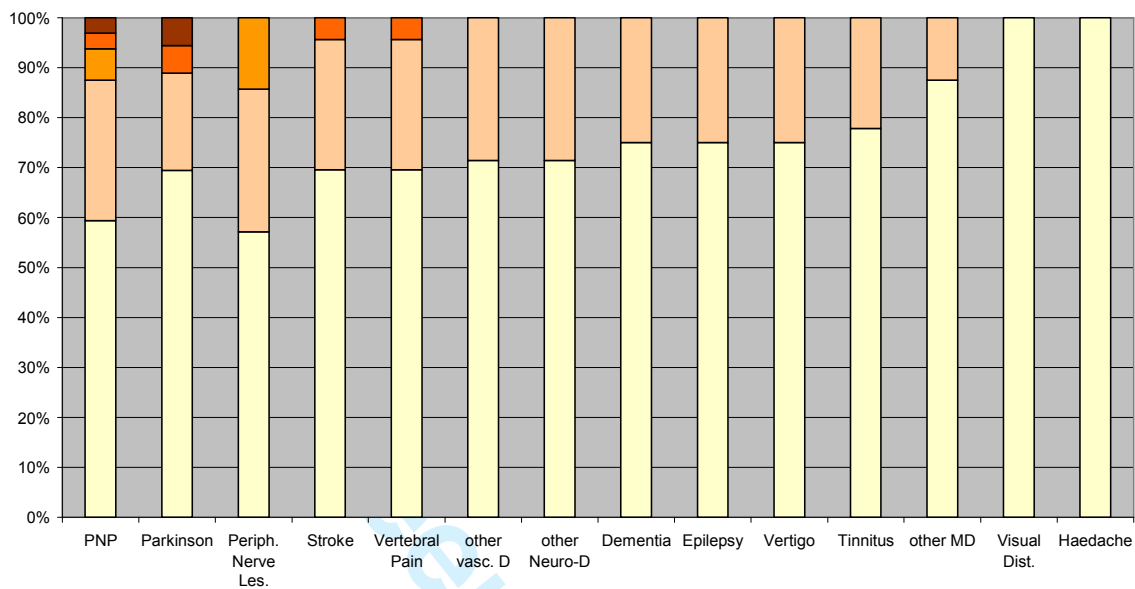

| Categories   | PNP (n)   | PD (n)    | PNL (n)   | Stroke (n) | Vert P (n) | other vasc (n) | Other n. D. (n) | Dem (n)  | Epi (n)  | Vertig (n) | Tinnitus (n) | other MD (n) | Visual Dist (n) | Haedache (n) |
|--------------|-----------|-----------|-----------|------------|------------|----------------|-----------------|----------|----------|------------|--------------|--------------|-----------------|--------------|
| V            | 1         | 2         | 0         | 0          | 0          | 0              | 0               | 0        | 0        | 0          | 0            | 0            | 0               | 0            |
| IV           | 1         | 2         | 0         | 1          | 1          | 0              | 0               | 0        | 0        | 0          | 0            | 0            | 0               | 0            |
| III          | 2         | 0         | 1         | 0          | 0          | 0              | 0               | 0        | 0        | 0          | 0            | 0            | 0               | 0            |
| II           | 9         | 7         | 2         | 6          | 6          | 4              | 4               | 1        | 1        | 3          | 2            | 1            | 0               | 0            |
| I            | 19        | 25        | 4         | 16         | 16         | 10             | 10              | 3        | 3        | 9          | 7            | 7            | 4               | 4            |
| 0            | 27        | 11        | 11        | 3          | 15         | 11             | 20              | 3        | 3        | 18         | 21           | 6            | 6               | 10           |
| <b>Total</b> | <b>59</b> | <b>47</b> | <b>18</b> | <b>26</b>  | <b>48</b>  | <b>25</b>      | <b>34</b>       | <b>7</b> | <b>7</b> | <b>30</b>  | <b>30</b>    | <b>14</b>    | <b>10</b>       | <b>14</b>    |

**Fig.1** Frequency of falls in neurological patients according to their neurological disorder. Fall Frequency Index (FFI) Category I = 1-2 falls in the last twelve months, Category II = 3-5, Category III = 6-10, Category IV = 11-20, and Category V = more than 20.

**Abbreviations:** PNP = peripheral neuropathy, Periph. nerve les. = peripheral nerve lesion, other MD = other movement disorders, other vasc. d. = other vascular disease, Visual.Dist. = visual disturbances

One year fall incidence in common neurological disorders

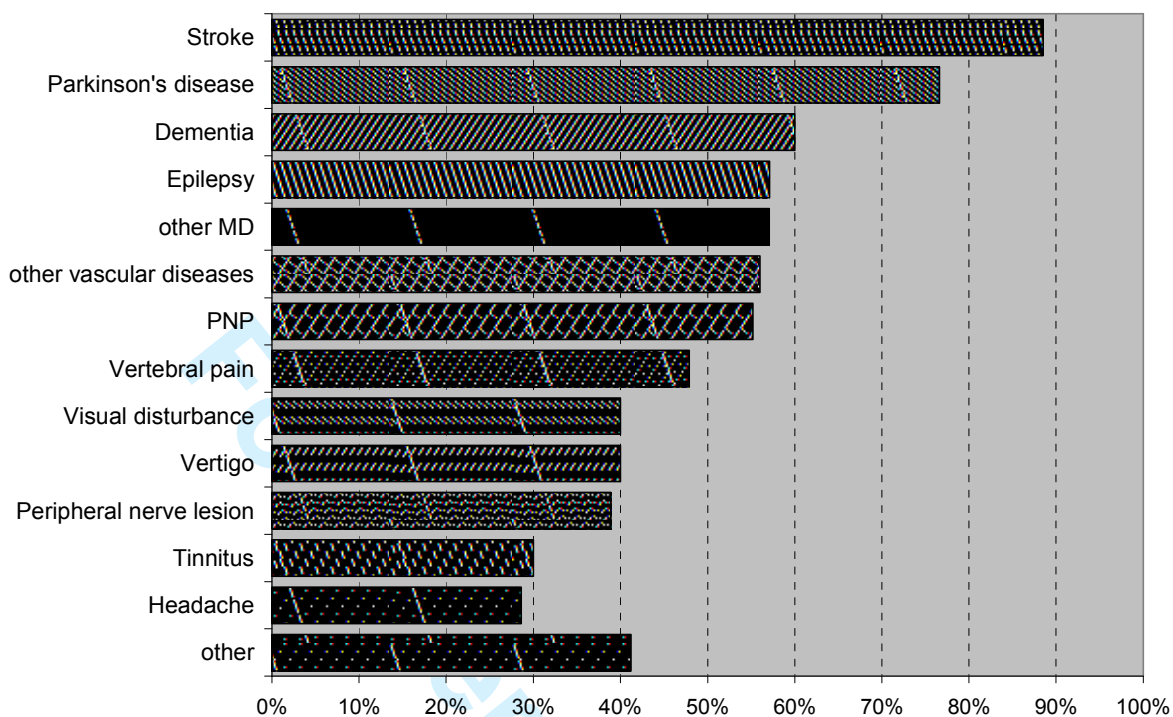

Fig.2 Difference in frequency of having at least one fall within the twelve-month period for patients suffering from the 13 most commonly encountered neurological disorders.

**Table 2: Neurological Patient groups: General demographics and fall risk**

| Diagnosis       | Age      | Bartel | Total<br>(n) | Falls<br>(n (%)) | Multiple<br>Falls*<br>(n (%)) | Fall fre-<br>quency**<br>(in fallers) | Risk of falling |              |         |
|-----------------|----------|--------|--------------|------------------|-------------------------------|---------------------------------------|-----------------|--------------|---------|
|                 |          |        |              |                  |                               |                                       | OR              | CI           | p-value |
| Stroke          | 82,7±2,3 | 99,76  | 26           | 23 (89%)         | 7 (30%)                       | 1,39±0,72                             | 40,1            | (11,3-141,7) | 0.000   |
| Parkinson D     | 74,8±8,1 | 99,79  | 47           | 36 (77%)         | 11 (31%)                      | 1,58±1,13                             | 17,1            | (7,9-37,2)   | 0.000   |
| Dementia        | 77,5±9,2 | 99,77  | 7            | 3 (60%)          | 1 (33%)                       | 1,33±0,58                             | 7,8             | (1,3-48,9)   | 0.01    |
| Epilepsy        | 71,0±8,2 | 99,78  | 7            | 4 (57%)          | 1 (25%)                       | 1,25±0,5                              | 7,0             | (1,5-32,7)   | 0.005   |
| other MD        | 74,3±7,9 | 100    | 14           | 8 (57%)          | 1 (13%)                       | 1,23±0,82                             | 7,0             | (2,3-21,5)   | 0.000   |
| other vasc. D   | 74,8±8,1 | 99,79  | 25           | 14 (56%)         | 4 (29%)                       | 1,29±0,47                             | 6,7             | (2,8-16,0)   | 0.000   |
| PNP             | 71,0±8,1 | 99,78  | 58           | 32 (55%)         | 13 (43%)                      | 1,63±0,98                             | 6,4             | (3,4-12,3)   | 0.000   |
| Vertebral Pain  | 76,8±9,1 | 99,75  | 48           | 23 (48%)         | 7 (30%)                       | 1,39±0,72                             | 4,8             | (2,4-9,5)    | 0.000   |
| Visual Disturb. | 69,5±0,7 | 99,77  | 10           | 4 (40%)          | 0 (0%)                        | 1±0                                   | 3,5             | (0,9-13,1)   | 0.051   |
| Vertigo         | 72,0±8,1 | 99,75  | 30           | 12 (40%)         | 3 (25%)                       | 1,25±0,45                             | 3,5             | (1,5-8,0)    | 0.002   |
| P. Nerve Les.   | 66,0±8,1 | 99,79  | 18           | 7 (39%)          | 3 (43%)                       | 1,57±0,79                             | 3,3             | (1,2-9,2)    | 0.016   |
| Tinnitus        | 74,3±8,4 | 99,76  | 30           | 9 (30%)          | 2 (22%)                       | 1,22±0,44                             | 2,2             | (0,9 - 5,3)  | 0.064   |
| Headache        | 74,8±8,1 | 99,79  | 14           | 4 (29%)          | 0 (0%)                        | 1,0±0.0                               | 2,1             | (0,6-7,1)    | 0,228   |
| Other           | 79,4±7,1 | 99,74  | 34           | 14 (41%)         | 4 (29%)                       | 1,29±0,47                             | 3,7             | (1,7 - 8,0)  | 0.001   |

\*) Multiple falls were defined as more than two falls per year (i.e. a fall frequency index  $\geq 2$ )

\*\*) Fall frequency index: Category I = 1-2 falls in the last twelve months, Category II = 3-5 falls in the last twelve months, Category III = 6-10 falls in the last twelve months, Category IV = 11-20 falls in the last twelve months, and Category V = more than 20 falls in the last twelve months.

## a) Balance confidence and occurrence of falls

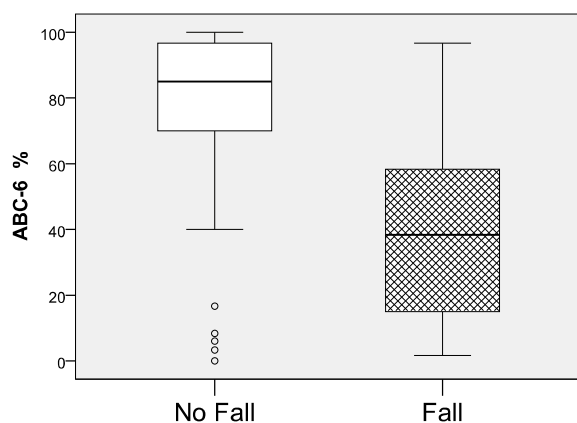

## b) Neurological comorbidities and falls

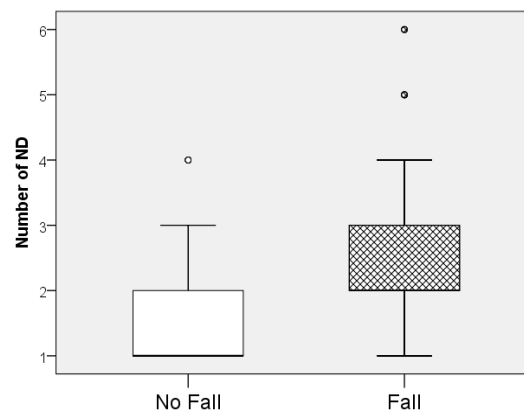

**Fig.3a,b** Differences in ABC-6 scores (3a) and number of neurological diseases (ND) (3b) of neurological patients with and without falls indicate that fallers as compared to non-fallers have lower confidence in their balance and a higher number of concomitant neurological diseases.

(ABC-6% meaning percentage scores of the 6-item version of the Activities-Specific Balance Confidence scale, number of ND meaning number of neurological diseases a patient is afflicted with)

1  
2  
3  
4  
5  
6  
7  
8 **The impact of neurological disorders on the risk for falls in the community**  
9 **dwelling elderly: a case controlled study**  
10  
11  
12  
13

14  
15 Homann, Barbara<sup>1</sup>; Plaschg, Annemarie<sup>1</sup>; Grundner, Marion<sup>1</sup>; Griedl, Theresa<sup>1</sup>; Ivanic, Gerd<sup>2</sup>;  
16 Hofer, Edith<sup>1</sup>; Fazekas, Franz<sup>1</sup>; Homann, Carl Nikolaus<sup>1</sup>  
17  
18

19  
20 <sup>1</sup>) Medical University Graz, Dept of Neurology, <sup>2</sup>) Paracelsus Medical University Salzburg, Dep. of  
21 Orthopaedic Surgery  
22  
23  
24  
25  
26  
27  
28  
29  
30  
31  
32  
33  
34  
35  
36  
37  
38  
39  
40  
41  
42  
43  
44  
45  
46  
47  
48  
49  
50  
51  
52  
53  
54  
55  
56  
57  
58  
59  
60

## ABSTRACT

**Objectives:** Owing to a lack of data, our aim was to evaluate and compare the impact of various common neurological diseases on the risk for falls in independent community dwelling senior citizens.

**Design:** Prospective case controlled study

**Setting:** General Hospital

**Participants:** Out of 298 consecutive patients and 214 controls enrolled, 228 patients (aged 74.5±7.8; 61% women) and 193 controls (aged 71.4±6.8; 63% women) were included. Exclusion criteria for patients were severe disability, disabling general condition, or severe cognitive impairment, for controls any history of neurological disorders or disabling medical conditions, and for both age below 60 years. A matching process led to 171 age- and gender-matched pairs of neurological patients and healthy controls.

**Main outcome measures:** One-year incidence of falls based on patients' 12 month recall; motor and non- motor function tests to detect additional risk factors.

**Results:** 46% of patients and 16% of controls fell at least once a year. Patients with stroke (89%), Parkinson's disease (77%), dementia (60%) or epilepsy (57%) had a particularly high **proportion of fallers**, but even **subgroups of** patients with the least fall-associated neurological diseases like tinnitus (30%) and headache (28%) had a higher **proportion of fallers** than the control group. Neuropathies, peripheral nerve lesions and Parkinson's disease were predisposing to recurrent falls. A higher number of neurological comorbidities ( $p<0.001$ ), lower Barthel Index values ( $p<0.001$ ), lower Activities-Specific Balance Confidence scores ( $p<0.001$ ), and higher Center of Epidemiological Studies Depression scores ( $p<0.001$ ) as well as higher age ( $p<0.001$ ) and female gender ( $p=0.003$ ) proved to further increase the risk of falls.

**Conclusions:** Medical practitioners, allied health professionals and carers ~~Physicians~~ should be aware that all elderly neurological patients seen in outpatient settings are potentially at high risk for falls; they should query them routinely about previous falls and fall risks and advise them on preventive strategies.



## Article summary

### *Article focus*

- Previous studies have shown that falls in the elderly are common and substantial amount of data on single neurological conditions like stroke and Parkinson's disease suggest that neurological impairments further increase the risk for falls.
- However, little is known on the influence of a broad range of neurological diseases and how they differ among each other.
- The aim of this study is to provide comparative data on the risk of falling in ambulatory elderly subjects afflicted with various common neurological diseases and to evaluate the role of additional risk factors.

### *Key messages*

- The results of our study suggest that all elderly neurological patients even when still ambulatory carry a heightened risk for falls.
- The impact differs according to disease but those with impairments of the sensorimotor system are particularly endangered. However our findings investigating yet unstudied populations, eg, such as headache revealed that even neurological disorders not directly connected with gait and balance carry an unexpected high risk for falls and that there is a cumulative effect of more than one neurological condition on the risk of falls.

### *Strengths and limitations of this study*

- Strengths of this study include the prospective study design, the number of standardised outcome measures, the standardised assessment of neurological patients and the thorough examination and inclusion of healthy controls.
- The following limitations should be considered: although the design is prospective, the falls history is retrospective, based on patients' recall over 12 months, therefore underreporting of cases is possible. Small sample sizes in some of the subgroups of neurological diseases. Participants were mostly of Caucasian origin and there was a high drop-out rate, which may limit the generalisability of the results to other populations.

## INTRODUCTION

Due to budget cuts and austerity measures the costs of accidents and falls have come into the spotlight of health policy makers. The World Health Organisation too has recently made fall prevention in the elderly one of its top priorities. The WHO Global Report on Falls Prevention in Older Age states that due to the high percentage of elderly people worldwide the economic and societal burden of falls will increase by epidemic proportions in all parts of the world over the next few decades, unless concerted action is taken in a systematic and proactive fashion by policy makers, researchers and practitioners<sup>1</sup>.

It is known that falls in the elderly are common and have a great impact on life and wellbeing. Studies have shown that around 30% of subjects of 65 years plus had a fall during the last 12 months<sup>2</sup> with 10% sustaining severe injuries<sup>3</sup>. Injuries are the fifth most frequent cause of death in the elderly and up to 70% of these injuries were caused by falls<sup>4</sup>. Elderly persons surviving a fall experience significant morbidity: as many as one-third require assistance in their activities of daily living for as long as 6 months<sup>5</sup>. Lasting disabilities are also common as many do not reach pre-fall physical functional states, resulting in increased dependency and (in up to 50%) a transfer to a care facility<sup>4</sup>. Associated as they are with considerable mortality as well as psychological and physical morbidity, these falls lead to increased dependence upon social support and health care services, with high economic impact on the social and health care system<sup>6</sup>. But there is substantial evidence that falls can be prevented when subjects at risk are identified and enrolled in targeted prevention programs.

Several risk factors like sociodemographic variables, physical activity, alcohol consumption, acute and chronic health problems, dizziness, mobility, and medications have been documented repeatedly<sup>7</sup>. Neurological impairments in the elderly are also thought to increase the risk for falls, though evidence for this is mostly derived indirectly from investigations into the causes of falls in the elderly<sup>8</sup>. These studies show that patients admitted to hospitals due to falls frequently also suffer from neurological disorders. Data derived from a multidisciplinary fall consultation survey suggest that in two out of three patients, potentially fall inducing neurological disorders were present, most of them (85%) previously undiagnosed<sup>9</sup>.

There is, however, substantially less known about the risk for falls in patients afflicted with various common neurological diseases. While there is already a substantial amount known about increased risk of falls in the stroke<sup>10</sup>, Parkinson's disease<sup>11</sup> or dementia<sup>12</sup> population, to our knowledge there is only one comparative study investigating falls in patients with of a broad range of neurological diseases. This study by Stolze, however, was conducted on patients with neurological diseases severe enough to require hospital admission<sup>13</sup>. To date little is known about the risk of falling in

1  
2  
3  
4  
5  
6 independent, community dwelling senior citizens afflicted with neurological diseases treatable in  
7 outpatient facilities. Studies targeting this issue so far either did not use a control group or, if they  
8 did, the absence of neurological signs and symptoms in this cohort was not guaranteed.

9  
10 Because falls in community dwelling elderly patients are assumed to be both prevalent and  
11 preventable, neurologists in outpatient settings need a sound base to identify patients with the  
12 highest risk, to reduce not only the number of falls and the suffering they entail, but also overall  
13 health care costs. Our study thus aimed to investigate the risk of falls in elderly patients with  
14 various neurological diseases that are commonly encountered in outpatient facilities. We  
15 hypothesized that even in community dwelling elderly patients, the impact one or more  
16 neurological diseases on top of an already increased propensity for falls is substantial; that patients  
17 with certain diseases like stroke or Parkinson's disease are particularly at risk; and that affliction  
18 with more than one of these high risk diseases increases the risk even further.  
19  
20  
21  
22  
23

## 24 25 26 27 **PARTICIPANTS AND METHODS**

### 28 29 30 31 **Setting**

32  
33 Data were collected at the general outpatient department of the Department of Neurology of the  
34 University Hospital in Graz, Austria. As visits to the outpatient department do not require specialist  
35 referrals, the disease spectrum largely resembles that seen by community based neurologists.  
36  
37

### 38 39 **Selection of participants and baseline examination**

40  
41 Physically independent community dwelling patients treated in our general neurological outpatient  
42 clinic aged 60 years and over were included in the study. Patients were all seen consecutively by  
43 one and the same consultant (CNH) in the period from July 2007 to May 2008, what also explains  
44 the study size. Severely disabled patients who were no longer able to walk unaided or were in poor  
45 general condition, be it for reasons of neurological or other medical disease, were excluded from the  
46 study. Cognitive impairment to an extent that an interview would no longer yield reliable results  
47 (MMSE $\leq$ 12), was also a cause for exclusion. All neurological patients included underwent a full  
48 neurological workup with an extensive history to detect signs of past and present neurological  
49 disorders. For the sake of uniformity, both the workup and history were structured and followed the  
50 study protocol.  
51

52  
53 As healthy controls, individuals from the general public out of the same catchment area as cases  
54  
55

1  
2  
3  
4  
5  
6 were enrolled. They were recruited among friends and acquaintances of the author and his  
7 workers who were aged 60+ and without any history of neurological disorders or other disabling  
8 medical conditions like heart failure, chronic obstructive pulmonary disease or rheumatoid arthritis  
9 severe enough to cause limitation of ordinary physical activity. Examination and history were as per  
10 study protocol, whereby special emphasis was placed on identifying symptoms and signs of  
11 Parkinson's disease, peripheral neuropathy, stroke or epilepsy, as well as minor sensory-motor  
12 deficits and gait or balance impairments. Controls with even subtle neurological pathologies were  
13 excluded. Although not routinely screened for cognitive deficits, obvious signs of or a known  
14 diagnosis of dementia or even of mild cognitive impairment was a reason for exclusion.

15  
16 A telephone follow-up was scheduled 12 months after the baseline outpatient visit; it was carried  
17 out by one of two examiners (AP, MG) following a predefined format and only subjects who had  
18 given verbal informed consent at the start of the telephone contact were interviewed.

19  
20 The first section of the interview questionnaire covered demographic data like age and place of  
21 residence. The residence category had 5 subsections on size and traffic infrastructure, with group 1  
22 being the state capital and group 5 a small town in the periphery. Next were specific questions on  
23 fall frequency, physical disability, depression and confidence in one's own sense of balance. The  
24 final section dealt with risk situations (like when using public transport) and general mobility  
25 issues, whereby the latter are not included in this publication.

26  
27 The survey, including all details concerning the selection process, was approved by the Ethics  
28 Committee of the Medical University Graz.

### 29 30 31 32 33 34 35 36 **Frequency of falls**

37 In the main section of the questionnaire patients and healthy controls were asked whether they had  
38 had a fall during the past 12 months and, if yes, how many times they had fallen. The yearly fall  
39 incidence was graded according to the fall frequency index into 5 categories. Category one means  
40 1-2 falls, category two 3-5, three 6-10, four 11-20, and five more than 20 falls.

### 41 42 43 44 **Disability**

45 The Barthel Index <sup>14</sup>, a disability scale with scores from 0 (completely dependent) to 100  
46 (completely independent) was used to evaluate the functional status of all neurological patients.

47 Parkinson patients were also rated according to the the Schwab and England Scale and Part II of the  
48 Unified Parkinson's Disease Rating Scale (UPDRS) <sup>15</sup>.

### 49 50 51 52 **Depression**

53 To determine the grade of depression, the Allgemeine Depressionsskala Kurzform (ADS-K) <sup>16</sup>, the  
54 German short form of the Center of Epidemiological Studies Depression Scale (CES-D) <sup>17</sup> was

1  
2  
3  
4  
5  
6 used. It is known to be particularly well suited for the use in the elderly and in patients with certain  
7 neurological disabilities<sup>18</sup>.  
8

### 9 10 11 **Balance Confidence**

12 We also rated the patients' confidence in their own sense of balance with the Activities-Specific  
13 Balance Confidence Scale (ABC -6 scale)<sup>19</sup>. Participants judged their confidence in performing  
14 specific activities without loss of balance or being unsteady on a scale ranging from 0% (no  
15 confidence at all) to 100% (completely confident). The total score was then computed as an average  
16 of the subscores.  
17  
18  
19

### 20 21 **Statistical analysis**

22 The primary outcomes was falls, based on participant recall over the prior 12 months. Falls were  
23 defined according to the WHO definition<sup>1</sup> as an event which results in a person coming to rest  
24 inadvertently on the ground or floor or other lower level irrespective of cause, thus including e.g.  
25 falls from epileptic seizures. The one-year incidence of falls was calculated for both healthy elderly  
26 individuals and the whole sample of neurological patients. Further calculations were done for  
27 subsamples of 13 neurological disorders with the highest prevalence ( $n \geq 7$ ). The diagnoses were  
28 based on the ICD-10 system for classification of diseases. The means and standard deviations were  
29 calculated for numerical values like the rating scale scores. For the identification of fall related risk  
30 factors, correlations (Kendall's  $\tau$ -B), and for the individual neurological disorders, odds ratios were  
31 computed ( $\alpha$ -level of significance  $p < 0.05$ ). Differences between neurological patients and healthy  
32 controls were tested with the Mann-Whitney U test or the chi-square test ( $\alpha$ -levels of significance  $p$   
33  $< 0.05$ ). To insure comparability of cohorts we formed age- and gender-matched pairs of patients  
34 and control subjects. For the matching process we used alphabetical lists of names of male and  
35 female neurological patients and likewise of healthy controls, sorted by age. Then working down  
36 the list we searched manually to find for each neurological patient one control subject of the same  
37 age. If no match was found then we looked for a control that was one year younger, then one year  
38 older, then two years and finally three years younger respectively older. Only complete sets of data  
39 were included in the calculations and no approximates to replace missing values were computed.  
40 Calculations were performed with SPSS® statistical software PASW statistics 18. Potential bias  
41 and how it was addressed will be dealt with in the section on limitations.  
42  
43  
44  
45  
46  
47  
48  
49  
50  
51

## 52 53 54 **RESULTS**

1  
2  
3  
4  
5  
6  
7  
8 During a period of 10 months we recruited 298 mobile neurological outpatients and 214 healthy  
9 controls aged 60 years and over. In the group of healthy controls 21 patients initially recruited could  
10 not be included in the study due to neurological symptoms and signs, or a history of a neurological  
11 disorder. In the group of neurological patients another 70 patients had to be excluded from the study  
12 because at the time of the interview they (n=10) or their caregiver (n=6) requested exclusion, the  
13 telephone number on record had been disconnected (n=24), all attempts to contact them failed  
14 (n=11), they had become so disabled that they could no longer participate in the survey (n=10), they  
15 had died (n=4), or for other reasons (n=5).

16  
17  
18 Prior to recruitment, twenty patients were excluded because of inability to walk unaided and one  
19 due to severe dementia. Of those that met inclusion criteria five rejected enrolment and six other  
20 patients could not be enrolled due to inadequate language skills (n=1), severe aphasia (n=1), or  
21 severe presbycusis (n=4).

22  
23  
24 The statistical analysis thus covered 228 neurological outpatients (aged  $74.5 \pm 7.8$ ; 61% women)  
25 and 193 healthy controls. The matching process led to 171 pairs of neurological patients and  
26 healthy controls, 101 women and 70 men in each group, aged 72.0 and 72.2 years, respectively. The  
27 details of these subjects are summarized in Table 1.  
28  
29  
30  
31  
32  
33

#### 34 **Incidence of falls in neurological patients and healthy controls**

35 One hundred and six (46.5%) neurological patients but only 31 (16.1%) healthy controls had fallen  
36 at least once ( $\text{Chi}^2=43.4$ ;  $p < 0.001$ ) during this one-year period. Out of ~~126~~ 106 neurological  
37 patients experiencing falls, 76 (71.7%) fell once or twice, 22 (20.8%) three to five times, three  
38 (2.8%) six to nine times, three (2.8%) 11-20 times and two (1.9%) more than 20 times. In the group  
39 of healthy controls, out of ~~76~~ 31 individuals with a history of falls, 24 (77.4%) fell once or twice,  
40 and seven (22.6%) three to five times, but none more often than that. In the matched cohorts as well  
41 falls were more frequent in neurological patients (42.1%) than in healthy controls (16.9%)  
42 ( $\text{Chi}^2=26.3$ ;  $p < 0.001$ ). (Table 1)  
43  
44  
45  
46  
47  
48

49 The mean age of individuals with a history of falls as compared to those without was higher both in  
50 the neurologically affected (fallers:  $76.7 \pm 7.6$  vs. nonfallers:  $72.6 \pm 7.5$ ;  $p < 0.001$ ) and in healthy  
51 controls (fallers:  $73.3 \pm 6.5$  vs. nonfallers:  $71.0 \pm 6.9$ ;  $p = 0.040$ ). In the group of neurological  
52 patients, 75 of 106 fallers (71%) were female, but only 31 (29%) were male ( $\text{Chi}^2=8.675$ ;  $p = 0.003$ ).  
53  
54  
55  
56  
57  
58  
59  
60

1  
2  
3  
4  
5  
6 Similarly, in the group of healthy controls a higher percentage of fallers was female, with 23 out of  
7 31 (74%), but this did not reach significance ( $\text{Chi}^2=1.915$ ;  $p=0.166$ ).

8  
9 The occurrence of falls in neurological patients was independent of where they lived. For healthy  
10 controls, however, their place of residence had an influence, in that subjects living in more rural  
11 environments were more prone to falls ( $\Gamma\text{-B}=0.217$ ;  $p<0.001$ ).

12  
13 Multiple falls occurred particularly in patients with peripheral neuropathy (43%), peripheral nerve  
14 lesion (43%), dementia (33%), Parkinson's disease (30%), stroke (30%) and vertebral pain (30%).  
15 The average fall frequency index in this group of five diseases ranged from 1.63 (peripheral  
16 neuropathy) to 1.33 (dementia). The proportion of fallers in each index category is shown for all  
17 these diseases in Fig. 1.  
18  
19

#### 20 21 22 23 24 **Risk factors for falls in neurological patients**

25 The type of neurological disease the patient was afflicted with influenced the proportion of fallers in  
26 that patients post stroke (89%), with Parkinson's disease (77%), dementia (60%) and epilepsy (57%)  
27 had the highest frequency of falls. The lowest likelihood of falls was found in patients suffering  
28 from tinnitus (30%) and headache (28%), but was still higher than that of the average healthy  
29 control (16.1%). (Fig. 2)  
30  
31

32  
33  
34  
35 The respective odds ratios are shown in table 2 and range from 40.1 (stroke) to 2.1 (headache) and  
36 the relative risk of falling ranges between 5.5 for stroke patients and 1.8 for patients with headache.  
37 No specific combination of two or three neurological diseases characterized by substantial gait or  
38 balance impairment but any accumulation of several neurological diseases regardless of their  
39 influence on gait or balance was able to cause a significant raise in falls ( $\Gamma\text{-B}=0.303$ ;  $p<0.001$ ).

40  
41  
42 Other risk factors for falls in neurological patients were female gender ( $\Gamma\text{-B}=0.195$ ;  $p=0.003$ ),  
43 higher age ( $\Gamma\text{-B}=0.217$ ;  $p<0.001$ ), higher disability or disease severity as measured by the Barthel  
44 Index ( $\Gamma\text{-B}=-0.232$ ;  $p<0.001$ ). Higher disability scores in Parkinson patients expressed by higher  
45 UPDRS II (activities of daily living) scores ( $\Gamma\text{-B}=-0.238$ ;  $p=0.062$ ) and higher Schwab & England  
46 scores ( $\Gamma\text{-B}=-0.235$ ;  $p=0.070$ ) resulted in a trend toward more frequent falls. Severity of depression  
47 as reflected by a higher ADS score ( $\Gamma\text{-B}=0.329$ ;  $p<0.001$ ) and low balance confidence reflected by  
48  
49  
50  
51 higher-lower ABC scores ( $\Gamma\text{-B}=-0.384$ ;  $p<0.001$ ) were also identified as risk factors (Fig. 3).  
52  
53  
54  
55  
56  
57  
58  
59  
60

## DISCUSSION

### Incidence of falling

Our study suggests that even in patients mildly to moderately affected by neurological impairments the incidence of falls was three times higher than in subjects without any neurological symptoms or signs. To our knowledge this is the first survey conducted on elderly neurological outpatients and controls proven to be without neurological impairments, but the extent of this increased relative risk in neurological patients was unexpected, and resulted from low incidence figures in the group of controls and particularly high figures in the patient group.

In our group of healthy controls the 12-month incidence (16.1 %) was considerably lower than in previous population based data serving as a reference for previous studies<sup>20</sup>. Literature suggests that a third to one half of the community dwelling population of 60+ experience falls each year. For a group of 1762 subjects 60+ years of age, Lord reported a yearly incidence rate of falls of 28%<sup>21</sup>. In individuals of 65 years and older Prudham found in his survey conducted on 2793 individuals that 28% experienced one or more falls in the last year<sup>22</sup>. In O'Loughlin's group of 409 it was 29%<sup>7</sup>, in Campbell's group of 533, 33%<sup>23</sup>, and in Blake's group of 1042, 35%.<sup>24</sup> Luukinen's group of 833 individuals aged 70+ showed a 30% annual rate of falls<sup>3</sup> and Tinetti's group of 336 aged 75+ showed a rate of 32%<sup>25</sup>. For the very old, Campbell found in a community-based prospective study based on 761 subjects that half of those age 80 years and over have a fall every year<sup>26</sup>. This incidence rate, twice or three times that of our figures, did not surprise us. Population-based data of elderly individuals inevitably include a considerable number of patients suffering from neurological diseases or other forms of gait or balance problems. Many of these neurological disorders like stroke, Alzheimer's disease or Parkinson's disease are typical diseases of the elderly and others like epilepsy or traumatic brain injury also have a second peak in higher age<sup>27</sup>. This shows that it can be of advantage, when studying groups of elderly patients, to have a truly healthy control group, as in our survey.

Our study also shows that half of all ambulatory neurological patients had had at least one fall within the last 12 month. As to our knowledge this is the first survey of neurological outpatients, the lack of comparative data gave us no choice but to relate our findings to Stolze's data on neurological inpatients showing, much to our surprise, a falling incidence as low as 34%<sup>13</sup>. One would have assumed that Stolze's patients, who required inpatient treatment for their neurological conditions, would be more severely disabled and thus more prone to falls than outpatients. It also appears contradictory our findings that indicators of disease severity like the Barthel index and the UPDRS II correlated positively with the incidence of falls. Several studies further support this concept by stat-



1  
2  
3  
4  
5  
6 ing that the more severely affected patients are, the higher the falling risk<sup>28</sup>. However, we have rea-  
7  
8 sons to believe that the correlation is not linear throughout all grades of disability but rather resem-  
9  
10 bles an inverse U-shaped curve. We think that the initial propensity for falls increases with higher  
11  
12 disability only up to a certain point. Then, as patients become more cautious and use all kind of  
13  
14 supports, it plateaus and even decreases. When patients become so disabled that they are finally  
15  
16 bedridden, the risk approaches zero with the lack of opportunities to fall. Our values so would be  
17  
18 located on the inclining leg close to the peak and Stolze's further down on the declining leg. Since  
19  
20 this concept ~~is not yet backed up by sound evidence~~ has yet only been proposed for PD<sup>29</sup> but not for  
21  
22 other neurological conditions, further studies directly comparing the risk of falling in neurological  
23  
24 inpatients and outpatients of various grades of disability are needed to support this assumption.

25  
26 Considering recurrent falls we found that in the group of neurological patients 13.2 % fell three or  
27  
28 more times per year, compared to 3.6% in the group of healthy controls. This is in keeping with the  
29  
30 results of studies investigating recurrent falls, where figures of 8% for three or more falls in ran-  
31  
32 domly selected community dwelling elderly individuals are given<sup>30</sup> and 10% for community based  
33  
34 seniors using home care services<sup>31</sup>. In Stolze's cohort of inpatients the value of 21% for recurrent  
35  
36 falls was higher and can probably be explained by methodological differences. Stolze's category of  
37  
38 recurrent falls already includes patients who had fallen twice, unlike our and other studies<sup>30,31</sup> that  
39  
40 include patients only after more than three falls.

### 41 42 43 **Risk factors contributing to falls**

44  
45 We found out that the type of neurological disease afflicting a patient determines the potential risk  
46  
47 factor for falls. Here, two diseases stood out: stroke patients were 6 times (89%) and Parkinson pa-  
48  
49 tients 5 times (71%) more likely to suffer falls than healthy controls (16%). This is in keeping with  
50  
51 previous community based studies showing a high likelihood for falls in stroke patients with a range  
52  
53 of 51-73%<sup>10, 20, 32</sup> and in Parkinson's patients with a range of 38 – 87%<sup>33-39</sup>. This was followed by  
54  
55 a group of neurological diseases with an almost 4 times higher likelihood (55-60%) of falls, consist-  
56  
57 ing of dementia, epilepsy, other movement disorders, other vascular diseases and peripheral neu-  
58  
59 ropathy. These diseases are also known to carry a high risk for falls, with an annual fall rate of 60-  
60  
80%<sup>12, 40</sup> in Alzheimer patients and 55-65%<sup>41-43</sup> in patients with peripheral neuropathy. The only  
study conducted on falls in elderly patients suffering from epilepsy is one on care facility residents,  
providing a 5-year fall incidence of 83%<sup>44</sup>. In our sample peripheral neuropathy also proved to be a  
risk factor for recurrent falls, but most likely significance was not reached due to the small sample  
size (p=0.061). Confirmative data also obtained from small cohorts revealed that ~~repetitive-multiple~~  
falls occurred in 10 out of 25 (40%) neuropathy patients<sup>43</sup> and another 13 out of 20 neuropathy pa-  
tients (65%) had a propensity for ~~multiple recurrent~~ falls for an average of 5.8 falls per year<sup>41</sup>. New

1  
2  
3  
4  
5  
6 | and quite astonishingly unexpected was the fact that even patients suffering from neurological diseases  
7 with no direct influence on gait or balance like headache (28%) had almost twice as many falls as  
8 the average healthy control (16.1%). Also new is that in contrast to all the above cited data derived  
9 from studies on patients with only one neurological disorder, our survey provides comparative val-  
10 ues for several neurological diseases of elderly ambulatory neurological patients for the first time,  
11 allowing a direct comparison between these disorders and a ranking according to the risk of falling.  
12 But our findings further suggest that not only the type of neurological conditions, but also the num-  
13 ber of neurological diseases a patient was suffering from, no matter whether they had an influence  
14 on gait or balance, correlated with the risk of falling. This came as a surprise as we assumed that  
15 only accumulations of neurological deficits relating to gait and balance would influence the risk for  
16 falls. Although there were no published studies on the influence of neurological diseases, it is  
17 known that persons with an impaired sense of balance have an disproportionately higher risk for  
18 falls when they acquire an additional new disease or condition, even if it is one that seems minor or  
19 not related to falling per se. Tinetti was able to demonstrate that the number of chronic diseases a  
20 patient was suffering from was highly predicative of a risk to fall, better even than a mobility score.  
21 She concluded that falling appears to result from an accumulated effect of multiple specific disabili-  
22 ties <sup>45</sup>. This would be in keeping with our other findings, that old age in combination with any neu-  
23 rological disease increases the risk of falling above that of healthy controls, even if it is a disease  
24 like headache. Also in accordance with this we found that a higher rate of depression, as reflected  
25 by a higher ADS-score, also increased the risk for falls. An alternative explanation for this could be  
26 that depressive thoughts are frequently combined with negative conceptions of one's own sense of  
27 balance, which was found to be a prominent risk factor for falls in our and previous other studies <sup>46</sup>.  
28 That higher age would be a predictive factor for falls in neurological patients replicates previous  
29 findings <sup>13</sup> and is easy to explain: old age is often associated with greater frailty and eventually  
30 frailty with less confidence in one's sense of balance and a higher incidence of falls <sup>46</sup>. That females  
31 are more prone to falls than males has often been stated before <sup>13</sup> and has previously been explained  
32 by a fear of falling and a loss of confidence – both independent risk factors for falls - being more  
33 prominent in women <sup>6</sup>.  
34  
35  
36  
37  
38  
39  
40  
41  
42  
43  
44  
45  
46  
47  
48

#### 49 LIMITATIONS

50  
51 We also faced several limitations in our study. First and most importantly, like most other surveys  
52 dealing with falls, we faced the problem that the number of falls are likely to be underreported.  
53 Elderly subjects often try to downplay problems regarding their mobility for fear of having their  
54  
55  
56  
57  
58  
59  
60

1  
2  
3  
4  
5  
6 autonomy restricted. While this is in general typically found in the healthy elderly, it might be even  
7 more prominent in patients with disabilities. But even remembering these events might pose a  
8 problem in some of the patients with central degenerative diseases and this might have been a  
9 relevant factor in our study, even though we excluded patients with severe dementia. The risk for  
10 falls in neurological patients might therefore be greater than shown in any results. Future  
11 prospective studies could minimize this problem by using patients diaries according to established  
12 guidelines for reporting falls <sup>47</sup> possibly even in combination with wearable miniaturized electronic  
13 devices apt to objectively detect and monitor falls <sup>48</sup>.

14  
15  
16  
17 Secondly, the large drop out rate of 23% from neurological assessment to interview, not containing  
18 the 3,6% that had to be excluded prior to recruitment due to inability or unwillingness to participate  
19 could have lead to further underestimating the number of patients with falls. However, since these  
20 patients did not obviously differ in their baseline characteristics, we assume this problem to be  
21 minimal.  
22  
23  
24

25  
26 Then, we would also like to address the issue of small sample sizes in subgroups of neurological  
27 diseases. Some of the groups like vascular diseases, movement disorders, vertebral pain and  
28 peripheral neuropathy are adequately sized, and even outnumber subjects of single disease studies  
29 like those on peripheral neuropathy <sup>41, 43</sup>. Others, particularly the dementia group with only seven  
30 patients, is, due to the exclusion of the more affected, quite small and allows only limited  
31 extrapolation. Nevertheless it is remarkable that even here the analysis of difference reached levels  
32 of significance.  
33  
34  
35  
36  
37  
38  
39

## 40 CONCLUSION

41  
42  
43 It can be said that we managed to show, apparently for the first time, that even among  
44 ambulatory neurological outpatients, falls are alarmingly frequent. The aetiology of falls is  
45 multi-factorial, but the connection between falls and disturbances of the sensorimotor  
46 system frequently found in neurological diseases in elderly patients is of great importance.  
47 Our findings revealed that even neurological diseases not directly connected with gait and  
48 balance carry an astonishingly high risk for falls. Medical practitioners, allied health  
49 professionals and carers ~~Neurologists~~ should therefore be aware that their patients are at high  
50 risk for falls, as any neurological deficit increases this risk, even more so if a combination of  
51 factors is present. Of course the risk has to be evaluated individually, but patients with  
52  
53  
54  
55  
56  
57  
58  
59  
60

1  
2  
3  
4  
5  
6 central diseases like stroke, Parkinson's disease, dementia and epilepsy, and for repeated  
7 falls also patients with peripheral neurological disorders, require special attention. Greater  
8 disability, higher age, female gender, depression and low confidence in the sense of balance  
9 are additional contributory factors that have to be taken into account in this process. For  
10 patients with several of these factors, targeted prevention programs should be implemented.  
11 However, although they have been shown to generally reduce falls and injuries in the  
12 community dwelling elderly<sup>49</sup>, there is but inconclusive evidence for patients following  
13 stroke<sup>50</sup> and with PD<sup>51,52</sup> and even more scanty information for patients with other  
14 neurological diseases. Therefore further larger scale multicenter neuro-geriatric surveys  
15 with larger sample sizes for neurological subgroups should be performed not only to confirm  
16 our observations but to acquire more extensive knowledge of the effectiveness of preventive  
17 measures in patient cohorts with various neurological conditions and different degrees of  
18 disability. These studies should also include more objective monitoring systems and include  
19 further potential risk factors like medication and fear of falling.  
20  
21  
22  
23  
24  
25  
26  
27  
28  
29

Field Code Changed

### NOTES

30  
31  
32 Acknowledgements: We acknowledge the study participants for their help and participation.  
33

34 Funding and Competing interests: All authors have completed the Unified Competing Interest form  
35 and declare: no support from any organisation for the submitted work; no financial relationships  
36 with any organisations that might have an interest in the submitted work in the previous three years;  
37 and no other relationships or activities that could appear to have influenced the submitted work.  
38 Thus, neither the study nor the salary of participants was funded by any third party.  
39

40 Ethical approval: This study was approved by the Ethics Committee of the Medical University Graz  
41

42  
43 Patient consent: obtained  
44  
45  
46  
47  
48  
49  
50  
51  
52  
53  
54  
55  
56  
57  
58  
59  
60

## REFERENCES

1. WHO. WHO global report on falls prevention in older age. Geneva, Switzerland: World Health Organization, 2007.
2. Gillespie LD. Preventing falls in older people: the story of a Cochrane review. *Cochrane database of systematic reviews* 2013;2:ED000053.
3. Luukinen H, Koski K, Hiltunen L, Kivela SL. Incidence rate of falls in an aged population in northern Finland. *Journal of clinical epidemiology* 1994;47:843-850.
4. Sattin RW, Lambert Huber DA, DeVito CA, et al. The incidence of fall injury events among the elderly in a defined population. *American journal of epidemiology* 1990;131:1028-1037.
5. Sleet DA, Moffett DB, Stevens J. CDC's research portfolio in older adult fall prevention: a review of progress, 1985-2005, and future research directions. *Journal of safety research* 2008;39:259-267.
6. Collerton J, Kingston A, Bond J, et al. The personal and health service impact of falls in 85 year olds: cross-sectional findings from the Newcastle 85+ cohort study. *PloS one* 2012;7:e33078.
7. O'Loughlin JL, Robitaille Y, Boivin JF, Suissa S. Incidence of and risk factors for falls and injurious falls among the community-dwelling elderly. *American journal of epidemiology* 1993;137:342-354.
8. Deandrea S, Lucenteforte E, Bravi F, Foschi R, La Vecchia C, Negri E. Risk factors for falls in community-dwelling older people: a systematic review and meta-analysis. *Epidemiology* 2010;21:658-668.
9. Guillochon A, Crinquette C, Gaxatte C, et al. [Neurological diseases detected in the Lille Multidisciplinary Falls Consultation]. *Revue neurologique* 2010;166:235-241.
10. Lamb SE, Ferrucci L, Volapto S, et al. Risk factors for falling in home-dwelling older women with stroke: the Women's Health and Aging Study. *Stroke; a journal of cerebral circulation* 2003;34:494-501.
11. Paul SS, Canning CG, Sherrington C, Lord SR, Close JC, Fung VS. Three simple clinical tests to accurately predict falls in people with Parkinson's disease. *Movement disorders : official journal of the Movement Disorder Society* 2013;28:655-662.
12. Horikawa E, Matsui T, Arai H, Seki T, Iwasaki K, Sasaki H. Risk of falls in Alzheimer's disease: a prospective study. *Internal medicine* 2005;44:717-721.
13. Stolze H, Klebe S, Zechlin C, Baecker C, Friege L, Deuschl G. Falls in frequent neurological diseases--prevalence, risk factors and aetiology. *J Neurol* 2004;251:79-84.
14. Mahoney FI, Barthel DW. Functional Evaluation: The Barthel Index. *Maryland state medical journal* 1965;14:61-65.
15. Fahn S ER, ed. Unified Parkinsons Disease Rating Scale. Florham Park: Macmillan Healthcare Information, 1987.
16. Hautzinger MB, Maya. Allgemeine Depressions Skala, Manual. Göttingen: Beltz Test GmbH, 1993.
17. Radloff LS. The CES-D Scale. *Applied Psychological Measurement* 1977;1:385-401.
18. Schrag A, Barone P, Brown RG, et al. Depression rating scales in Parkinson's disease: critique and recommendations. *Movement disorders : official journal of the Movement Disorder Society* 2007;22:1077-1092.
19. Peretz C, Herman T, Hausdorff JM, Giladi N. Assessing fear of falling: Can a short version of the Activities-specific Balance Confidence scale be useful? *Movement disorders : official journal of the Movement Disorder Society* 2006;21:2101-2105.
20. Forster A, Young J. Incidence and consequences of falls due to stroke: a systematic inquiry. *Bmj* 1995;311:83-86.

Formatted: Spanish (International Sort)

21. Lord SR, Sambrook PN, Gilbert C, et al. Postural stability, falls and fractures in the elderly: results from the Dubbo Osteoporosis Epidemiology Study. *The Medical journal of Australia* 1994;160:684-685, 688-691.
22. Prudham D, Evans JG. Factors associated with falls in the elderly: a community study. *Age and ageing* 1981;10:141-146.
23. Campbell AJ, Borrie MJ, Spears GF, Jackson SL, Brown JS, Fitzgerald JL. Circumstances and consequences of falls experienced by a community population 70 years and over during a prospective study. *Age and ageing* 1990;19:136-141.
24. Blake AJ, Morgan K, Bendall MJ, et al. Falls by elderly people at home: prevalence and associated factors. *Age and ageing* 1988;17:365-372.
25. Tinetti ME, Speechley M, Ginter SF. Risk factors for falls among elderly persons living in the community. *The New England journal of medicine* 1988;319:1701-1707.
26. Campbell AJ, Borrie MJ, Spears GF. Risk factors for falls in a community-based prospective study of people 70 years and older. *Journal of gerontology* 1989;44:M112-117.
27. Hirtz D, Thurman DJ, Gwinn-Hardy K, Mohamed M, Chaudhuri AR, Zalutsky R. How common are the "common" neurologic disorders? *Neurology* 2007;68:326-337.
28. Schmid AA, Kapoor JR, Dallas M, Bravata DM. Association between stroke severity and fall risk among stroke patients. *Neuroepidemiology*;34:158-162.
29. Bloem BR, van Vugt JP, Beckley DJ. Postural instability and falls in Parkinson's disease. *Advances in neurology* 2001;87:209-223.
30. Soriano TA, DeCherrie LV, Thomas DC. Falls in the community-dwelling older adult: a review for primary-care providers. *Clinical interventions in aging* 2007;2:545-554.
31. Fletcher PC, Hirdes JP. Risk factors for falling among community-based seniors using home care services. *The journals of gerontology Series A, Biological sciences and medical sciences* 2002;57:M504-510.
32. Yates JS, Lai SM, Duncan PW, Studenski S. Falls in community-dwelling stroke survivors: an accumulated impairments model. *Journal of rehabilitation research and development* 2002;39:385-394.
33. Balash Y, Peretz C, Leibovich G, Herman T, Hausdorff JM, Giladi N. Falls in outpatients with Parkinson's disease: frequency, impact and identifying factors. *Journal of neurology* 2005;252:1310-1315.
34. Koller WC, Glatt S, Vetere-Overfield B, Hassanein R. Falls and Parkinson's disease. *Clinical neuropharmacology* 1989;12:98-105.
35. Ashburn A, Stack E, Pickering RM, Ward CD. Predicting fallers in a community-based sample of people with Parkinson's disease. *Gerontology* 2001;47:277-281.
36. Gray P, Hildebrand K. Fall risk factors in Parkinson's disease. *The Journal of neuroscience nursing : journal of the American Association of Neuroscience Nurses* 2000;32:222-228.
37. Wood BH, Bilclough JA, Bowron A, Walker RW. Incidence and prediction of falls in Parkinson's disease: a prospective multidisciplinary study. *Journal of neurology, neurosurgery, and psychiatry* 2002;72:721-725.
38. Pickering RM, Grimbergen YA, Rigney U, et al. A meta-analysis of six prospective studies of falling in Parkinson's disease. *Movement disorders : official journal of the Movement Disorder Society* 2007;22:1892-1900.
39. Hely MA, Reid WG, Adena MA, Halliday GM, Morris JG. The Sydney multicenter study of Parkinson's disease: the inevitability of dementia at 20 years. *Movement disorders : official journal of the Movement Disorder Society* 2008;23:837-844.
40. Ryan JJ, McCloy C, Rundquist P, Srinivasan V, Laird R. Fall risk assessment among older adults with mild Alzheimer disease. *J Geriatr Phys Ther*;34:19-27.
41. DeMott TK, Richardson JK, Thies SB, Ashton-Miller JA. Falls and gait characteristics among older persons with peripheral neuropathy. *American journal of physical medicine & rehabilitation / Association of Academic Physiatrists* 2007;86:125-132.

- 1  
2  
3  
4  
5  
6 42. Richardson JK, Ching C, Hurvitz EA. The relationship between electromyographically  
7 documented peripheral neuropathy and falls. *Journal of the American Geriatrics Society*  
8 1992;40:1008-1012.
- 9 43. Richardson JK, Hurvitz EA. Peripheral neuropathy: a true risk factor for falls. *The journals*  
10 *of gerontology Series A, Biological sciences and medical sciences* 1995;50:M211-215.
- 11 44. Flierl-Hecht A, Pfafflin M, May TW, Kohlschutter S, Hensel B, Stefan H. [Is epilepsy in the  
12 elderly overlooked? An investigation in a home for the aged]. *Der Nervenarzt* 2003;74:691-698.
- 13 45. Tinetti ME, Williams TF, Mayewski R. Fall risk index for elderly patients based on number  
14 of chronic disabilities. *The American journal of medicine* 1986;80:429-434.
- 15 46. Kose N, Cuvalci S, Ekici G, Otman AS, Karakaya MG. The risk factors of fall and their  
16 correlation with balance, depression, cognitive impairment and mobility skills in elderly nursing  
17 home residents. *Saudi medical journal* 2005;26:978-981.
- 18 47. Lamb SE, Jorstad-Stein EC, Hauer K, Becker C, Prevention of Falls Network E, Outcomes  
19 Consensus G. Development of a common outcome data set for fall injury prevention trials: the  
20 Prevention of Falls Network Europe consensus. *Journal of the American Geriatrics Society*  
21 2005;53:1618-1622.
- 22 48. Howcroft J, Kofman J, Lemaire ED. Review of fall risk assessment in geriatric populations  
23 using inertial sensors. *Journal of neuroengineering and rehabilitation* 2013;10:91.
- 24 49. Oliver D, Connelly JB, Victor CR, et al. Strategies to prevent falls and fractures in hospitals  
25 and care homes and effect of cognitive impairment: systematic review and meta-analyses. *Bmj*  
26 2007;334:82.
- 27 50. Verheyden GS, Weerdesteyn V, Pickering RM, et al. Interventions for preventing falls in  
28 people after stroke. *Cochrane database of systematic reviews* 2013;5:CD008728.
- 29 51. Goodwin VA, Richards SH, Henley W, Ewings P, Taylor AH, Campbell JL. An exercise  
30 intervention to prevent falls in people with Parkinson's disease: a pragmatic randomised controlled  
31 trial. *Journal of neurology, neurosurgery, and psychiatry* 2011;82:1232-1238.
- 32 52. Li F, Harmer P, Fitzgerald K, et al. Tai chi and postural stability in patients with Parkinson's  
33 disease. *The New England journal of medicine* 2012;366:511-519.
- 34  
35  
36  
37  
38  
39  
40  
41  
42  
43  
44  
45  
46  
47  
48  
49  
50  
51  
52  
53  
54  
55  
56  
57  
58  
59  
60

## TABLES AND FIGURES

**Table 1: Neurological patients and healthy controls: General demographics and fall frequency**

|                                   | Total               |                    |         | Matched pairs       |                    |         |
|-----------------------------------|---------------------|--------------------|---------|---------------------|--------------------|---------|
|                                   | Patients<br>(n=228) | Healthy<br>(n=193) | p-value | Patients<br>(n=171) | Healthy<br>(n=171) | p-value |
| <b>Total</b>                      |                     |                    |         |                     |                    |         |
| Age                               | 74.5±7.8            | 71.4±6.8           | 0.000   | 72.2±7.0            | 72.0±6.9           | 0.839   |
| Gender (f in %)                   | 61%                 | 63%                | 0.572   | 59%                 | 59%                | 1.000   |
| Region (Residential Index: mean)  | 2.53                | 2.21               | 0.021   | 2.66                | 2.22               | 0.004   |
| Disability (Bartelindex: mean)    | 98.20               | n.d.               |         | 98.24               | n.d.               |         |
| Balance (ABC-score: mean)         | 73.19               | n.d.               |         | 83.39               | n.d.               |         |
| Depression (ADS-K-score: mean)    | 7.2                 | n.d.               |         | 6.9                 | n.d.               |         |
|                                   |                     |                    |         |                     |                    |         |
| <b>Fallers</b>                    |                     |                    |         |                     |                    |         |
| Falls (n (%))                     | 46.5%               | 16.1%              | 0.000   | 42.1%               | 16.9%              | 0.000   |
| Multiple Falls (>2 falls) (n (%)) | 28.3%               | 22.6%              | 0.528   | 26.4%               | 24.1%              | 0.815   |
| Fall frequency Index (in fallers) | 1.42±0.8            | 1.23±0.4           | 0.078   | 1.44±0.9            | 1.24±0.4           | 0.14    |



Percentage of multifallers in various Neurological Diseases according to FFI categories

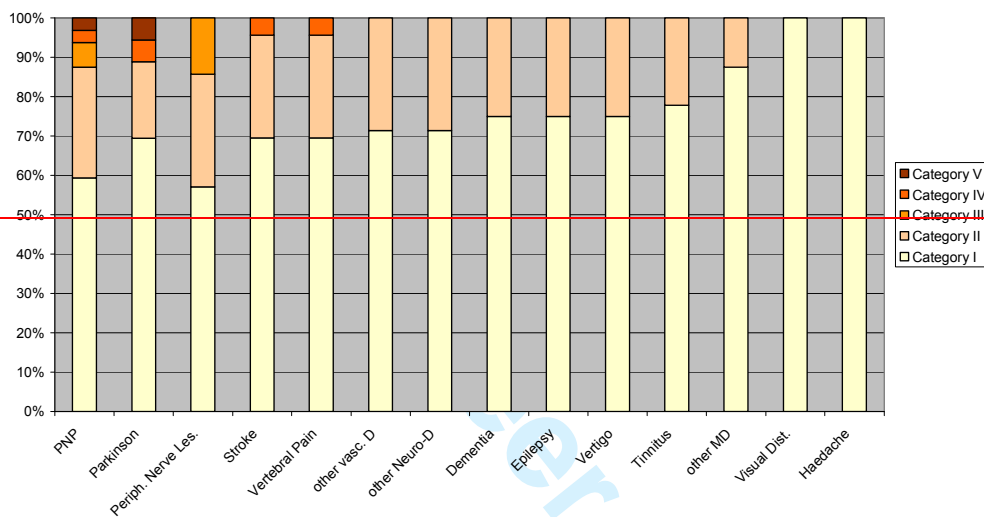

Percentage of Fallers in various Neurological Diseases according to FFI Categories

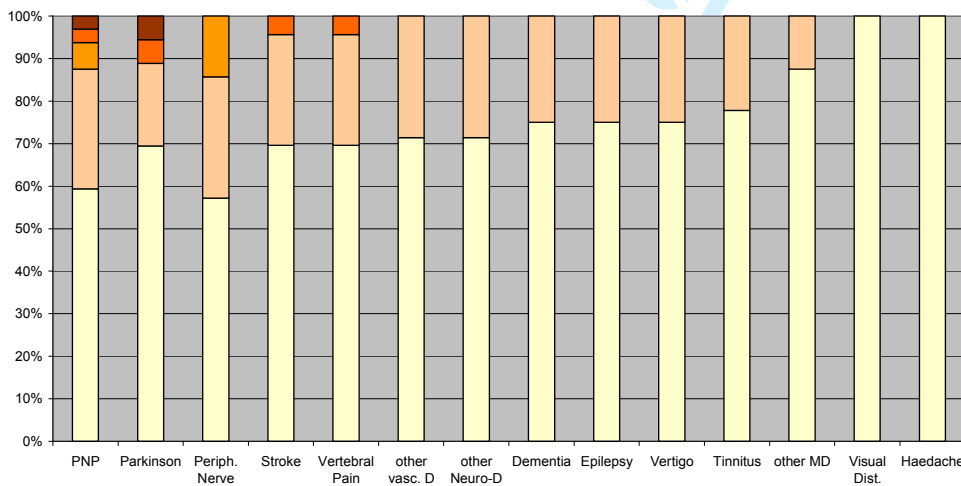

| Cate-gories | PNP (n) | PD (n) | PNL (n) | Strok e (n) | Vert P (n) | other vasc (n) | Other n. D. (n) | Dem (n) | Epi (n) | Vertig (n) | Tinni-tus (n) | other MD (n) | Visual Dist (n) | Haed-ache (n) |
|-------------|---------|--------|---------|-------------|------------|----------------|-----------------|---------|---------|------------|---------------|--------------|-----------------|---------------|
| V           | 1       | 2      | 0       | 0           | 0          | 0              | 0               | 0       | 0       | 0          | 0             | 0            | 0               | 0             |
| IV          | 1       | 2      | 0       | 1           | 1          | 0              | 0               | 0       | 0       | 0          | 0             | 0            | 0               | 0             |
| III         | 2       | 0      | 1       | 0           | 0          | 0              | 0               | 0       | 0       | 0          | 0             | 0            | 0               | 0             |
| II          | 9       | 7      | 2       | 6           | 6          | 4              | 4               | 1       | 1       | 3          | 2             | 1            | 0               | 0             |
| I           | 19      | 25     | 4       | 16          | 16         | 10             | 10              | 3       | 3       | 9          | 7             | 7            | 4               | 4             |

|              |           |           |           |           |           |           |           |          |          |           |           |           |           |           |
|--------------|-----------|-----------|-----------|-----------|-----------|-----------|-----------|----------|----------|-----------|-----------|-----------|-----------|-----------|
| 0            | 27        | 11        | 11        | 3         | 15        | 11        | 20        | 3        | 3        | 18        | 21        | 6         | 6         | 10        |
| <b>Total</b> | <b>59</b> | <b>47</b> | <b>18</b> | <b>26</b> | <b>48</b> | <b>25</b> | <b>34</b> | <b>7</b> | <b>7</b> | <b>30</b> | <b>30</b> | <b>14</b> | <b>10</b> | <b>14</b> |

**Fig.1** Frequency of falls in neurological patients according to their neurological disorder. Fall Frequency Index (FFI) Category I = 1-2 falls in the last twelve months, Category II = 3-5, Category III = 6-10, Category IV = 11-20, and Category V = more than 20.

**Abbreviations:** PNP = peripheral neuropathy, Periph. nerve les. = peripheral nerve lesion, other MD = other movement disorders, other vasc. d. = other vascular disease, Visual.Dist. = visual disturbances

1  
2  
3  
4  
5  
6  
7  
8  
9  
10  
11  
12  
13  
14  
15  
16  
17  
18  
19  
20  
21  
22  
23  
24  
25  
26  
27  
28  
29  
30  
31  
32  
33  
34  
35  
36  
37  
38  
39  
40  
41  
42  
43  
44  
45  
46  
47  
48  
49  
50  
51  
52  
53  
54  
55  
56  
57  
58  
59  
60

**One year fall incidence in common neurological disorders**

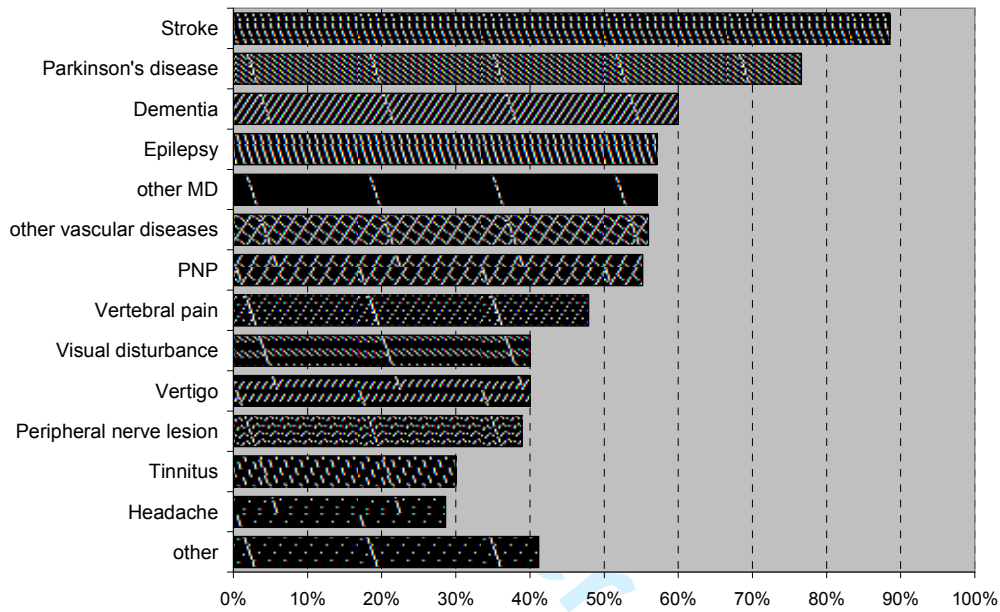

**Fig.2** Difference in frequency of having at least one fall within the twelve-month period for patients suffering from the 13 most commonly encountered neurological disorders.

**Table 2: Neurological Patient groups: General demographics and fall risk**

| Diagnosis       | Age      | Bartel | Total<br>(n) | Falls<br>(n (%)) | Multiple<br>Falls*<br>(n (%)) | Fall fre-<br>quency**<br>(in fallers) | Risk of falling |              |         |
|-----------------|----------|--------|--------------|------------------|-------------------------------|---------------------------------------|-----------------|--------------|---------|
|                 |          |        |              |                  |                               |                                       | OR              | CI           | p-value |
| Stroke          | 82,7±2,3 | 99,76  | 26           | 23 (89%)         | 7 (30%)                       | 1,39±0,72                             | 40,1            | (11,3-141,7) | 0.000   |
| Parkinson D     | 74,8±8,1 | 99,79  | 47           | 36 (77%)         | 11 (31%)                      | 1,58±1,13                             | 17,1            | (7,9-37,2)   | 0.000   |
| Dementia        | 77,5±9,2 | 99,77  | 7            | 3 (60%)          | 1 (33%)                       | 1,33±0,58                             | 7,8             | (1,3-48,9)   | 0.01    |
| Epilepsy        | 71,0±8,2 | 99,78  | 7            | 4 (57%)          | 1 (25%)                       | 1,25±0,5                              | 7,0             | (1,5-32,7)   | 0.005   |
| other MD        | 74,3±7,9 | 100    | 14           | 8 (57%)          | 1 (13%)                       | 1,23±0,82                             | 7,0             | (2,3-21,5)   | 0.000   |
| other vasc. D   | 74,8±8,1 | 99,79  | 25           | 14 (56%)         | 4 (29%)                       | 1,29±0,47                             | 6,7             | (2,8-16,0)   | 0.000   |
| PNP             | 71,0±8,1 | 99,78  | 58           | 32 (55%)         | 13 (43%)                      | 1,63±0,98                             | 6,4             | (3,4-12,3)   | 0.000   |
| Vertebral Pain  | 76,8±9,1 | 99,75  | 48           | 23 (48%)         | 7 (30%)                       | 1,39±0,72                             | 4,8             | (2,4-9,5)    | 0.000   |
| Visual Disturb. | 69,5±0,7 | 99,77  | 10           | 4 (40%)          | 0 (0%)                        | 1±0                                   | 3,5             | (0,9-13,1)   | 0.051   |
| Vertigo         | 72,0±8,1 | 99,75  | 30           | 12 (40%)         | 3 (25%)                       | 1,25±0,45                             | 3,5             | (1,5-8,0)    | 0.002   |
| P. Nerve Les.   | 66,0±8,1 | 99,79  | 18           | 7 (39%)          | 3 (43%)                       | 1,57±0,79                             | 3,3             | (1,2-9,2)    | 0.016   |
| Tinnitus        | 74,3±8,4 | 99,76  | 30           | 9 (30%)          | 2 (22%)                       | 1,22±0,44                             | 2,2             | (0,9 - 5,3)  | 0.064   |
| Headache        | 74,8±8,1 | 99,79  | 14           | 4 (29%)          | 0 (0%)                        | 1,0±0,0                               | 2,1             | (0,6-7,1)    | 0,228   |
| Other           | 79,4±7,1 | 99,74  | 34           | 14 (41%)         | 4 (29%)                       | 1,29±0,47                             | 3,7             | (1,7 - 8,0)  | 0.001   |

\*) Multiple falls were defined as more than two falls per year (i.e. a fall frequency index  $\geq 2$ )

\*\*) Fall frequency index: Category I = 1-2 falls in the last twelve months, Category II = 3-5 falls in the last twelve months, Category III = 6-10 falls in the last twelve months, Category IV = 11-20 falls in the last twelve months, and Category V = more than 20 falls in the last twelve months.

a) Balance confidence and occurrence of falls

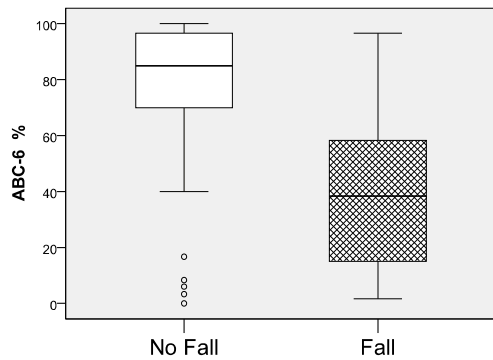

b) Neurological comorbidities and falls

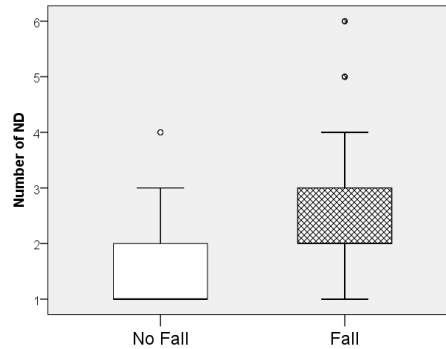

**Fig.3a,b** Differences in ABC-6 scores (3a) and number of neurological diseases (ND) (3b) of neurological patients with and without falls indicate that fallers as compared to non-fallers have lower confidence in their balance and a higher number of concomitant neurological diseases.

(ABC-6% meaning percentage scores of the 6-item version of the Activities-Specific Balance Confidence scale, number of ND meaning number of neurological diseases a patient is afflicted with)

## STROBE checklist - observational studies

|                           | Item No | Recommendation                                                                                                                                                                                                                                                                                                                                                                                                                                                            |                                            |
|---------------------------|---------|---------------------------------------------------------------------------------------------------------------------------------------------------------------------------------------------------------------------------------------------------------------------------------------------------------------------------------------------------------------------------------------------------------------------------------------------------------------------------|--------------------------------------------|
| <b>Title and abstract</b> |         |                                                                                                                                                                                                                                                                                                                                                                                                                                                                           |                                            |
|                           | 1       | (a) Indicate the study's design with a commonly used term in the title or the abstract<br>(b) Provide in the abstract an informative and balanced summary of what was done and what was found                                                                                                                                                                                                                                                                             | p1, p2 I12<br>p2                           |
| <b>Introduction</b>       |         |                                                                                                                                                                                                                                                                                                                                                                                                                                                                           |                                            |
| Background/rationale      | 2       | Explain the scientific background and rationale for the investigation being reported                                                                                                                                                                                                                                                                                                                                                                                      | P4-5                                       |
| Objectives                | 3       | State specific objectives, including any prespecified hypotheses                                                                                                                                                                                                                                                                                                                                                                                                          | P5 I12-20                                  |
| <b>Methods</b>            |         |                                                                                                                                                                                                                                                                                                                                                                                                                                                                           |                                            |
| Study design              | 4       | Present key elements of study design early in the paper                                                                                                                                                                                                                                                                                                                                                                                                                   | P5 I40 – p6 I27                            |
| Setting                   | 5       | Describe the setting, locations, and relevant dates, including periods of recruitment, exposure, follow-up, and data collection                                                                                                                                                                                                                                                                                                                                           | P5 I32-37, p5 I42-47, p6 I17-21, p6 I22-26 |
| Participants              | 6       | (a) <i>Cohort study</i> ? Give the eligibility criteria, and the sources and methods of selection of participants. Describe methods of follow-up<br><i>Case-control study</i> ? Give the eligibility criteria, and the sources and methods of case ascertainment and control selection. Give the rationale for the choice of cases and controls<br><i>Cross sectional study</i> ? Give the eligibility criteria, and the sources and methods of selection of participants | P5 I42- p6 I15                             |
|                           |         | (b) <i>Cohort study</i> ? For matched studies, give matching criteria and number of exposed and unexposed<br><i>Case-control study</i> ? For matched studies, give matching criteria and the number of controls per case                                                                                                                                                                                                                                                  | P7 I4 I48                                  |
| Variables                 | 7       | Clearly define all outcomes, exposures, predictors, potential confounders, and effect modifiers. Give diagnostic criteria, if applicable                                                                                                                                                                                                                                                                                                                                  | P6 I37-p7 I16                              |
| Data sources/measurement  | 8*      | For each variable of interest, give sources of data and details of methods of assessment (measurement). Describe comparability of assessment methods if there is more than one group                                                                                                                                                                                                                                                                                      | P6 I37-p7 I16                              |
| Bias                      | 9       | Describe any efforts to address potential sources of bias                                                                                                                                                                                                                                                                                                                                                                                                                 | P13 I18-21, p7 I40-48                      |
| Study size                | 10      | Explain how the study size was arrived at                                                                                                                                                                                                                                                                                                                                                                                                                                 | P5 I46-47                                  |
| Quantitative variables    | 11      | Explain how quantitative variables were handled in the analyses. If applicable, describe which groupings were chosen and why                                                                                                                                                                                                                                                                                                                                              | P7 I28-30                                  |
| Statistical methods       | 12      | (a) Describe all statistical methods, including those used to control for confounding                                                                                                                                                                                                                                                                                                                                                                                     | P7 I31-53                                  |
|                           |         | (b) Describe any methods used to examine subgroups and interactions                                                                                                                                                                                                                                                                                                                                                                                                       | P7 I37-39                                  |
|                           |         | (c) Explain how missing data were addressed                                                                                                                                                                                                                                                                                                                                                                                                                               | P7 I48-49                                  |
|                           |         | (d) <i>Cohort study</i> ? If applicable, explain how loss to follow-up was addressed<br><i>Case-control study</i> ? If applicable, explain how matching of cases and controls was addressed<br><i>Cross sectional study</i> ? If applicable, describe analytical methods taking account of sampling strategy                                                                                                                                                              | P13 I15-22                                 |
|                           |         | (e) Describe any sensitivity analyses                                                                                                                                                                                                                                                                                                                                                                                                                                     | P7 I35                                     |
| <b>Results</b>            |         |                                                                                                                                                                                                                                                                                                                                                                                                                                                                           |                                            |
| Participants              | 13*     | (a) Report numbers of individuals at each stage of study? eg numbers potentially eligible, examined for eligibility, confirmed eligible, included in the study, completing follow-up, and analysed                                                                                                                                                                                                                                                                        | P8 I4-29                                   |
|                           |         | (b) Give reasons for non-participation at each stage                                                                                                                                                                                                                                                                                                                                                                                                                      | √p8 I4-29                                  |
|                           |         | (c) Consider use of a flow diagram                                                                                                                                                                                                                                                                                                                                                                                                                                        | -                                          |
| Descriptive data          | 14*     | (a) Give characteristics of study participants (eg demographic, clinical, social) and information on exposures and potential confounders                                                                                                                                                                                                                                                                                                                                  | P18                                        |
|                           |         | (b) Indicate number of participants with missing data for each variable of interest                                                                                                                                                                                                                                                                                                                                                                                       | P8 I36-p9 I55                              |
|                           |         | (c) <i>Cohort study</i> ? Summarise follow-up time (eg average and total amount)                                                                                                                                                                                                                                                                                                                                                                                          | P8 I38                                     |
| Outcome data              | 15*     | <i>Cohort study</i> ? Report numbers of outcome events or summary measures over time                                                                                                                                                                                                                                                                                                                                                                                      | n.a.                                       |
|                           |         | <i>Case-control study</i> ? Report numbers in each exposure category, or summary measures of exposure                                                                                                                                                                                                                                                                                                                                                                     | P8 I35 – p9 I55                            |
|                           |         | <i>Cross sectional study</i> ? Report numbers of outcome events or summary measures                                                                                                                                                                                                                                                                                                                                                                                       | n.a.                                       |
| Main results              | 16      | (a) Report the numbers of individuals at each stage of the study? eg numbers                                                                                                                                                                                                                                                                                                                                                                                              | P8 I3-29                                   |

|                          | Item No | Recommendation                                                                                                                                                             |                   |
|--------------------------|---------|----------------------------------------------------------------------------------------------------------------------------------------------------------------------------|-------------------|
|                          |         | potentially eligible, examined for eligibility, confirmed eligible, included in the study, completing follow-up, and analysed                                              |                   |
|                          |         | (b) Give reasons for non-participation at each stage                                                                                                                       | P8 I3-29          |
|                          |         | (c) Consider use of a flow diagram                                                                                                                                         | -                 |
| Other analyses           | 17      | Report other analyses done?eg analyses of subgroups and interactions, and sensitivity analyses                                                                             | P9 I23-55         |
| <b>Discussion</b>        |         |                                                                                                                                                                            |                   |
| Key results              | 18      | Summarise key results with reference to study objectives                                                                                                                   | P3 I25-37         |
| Limitations              | 19      | Discuss limitations of the study, taking into account sources of potential bias or imprecision. Discuss both direction and magnitude of any potential bias                 | P12 I52 – p13 I36 |
| Interpretation           | 20      | Give a cautious overall interpretation of results considering objectives, limitations, multiplicity of analyses, results from similar studies, and other relevant evidence | P13 I43- p14 I24  |
| Generalisability         | 21      | Discuss the generalisability (external validity) of the study results                                                                                                      | P3 I50-53         |
| <b>Other information</b> |         |                                                                                                                                                                            |                   |
| Funding                  | 22      | Give the source of funding and the role of the funders for the present study and, if applicable, for the original study on which the present article is based              | P14 I35-41        |
